# Supplementary material for: Interpretable Machine Learning Model for Pediatric Primary Nephrotic Syndrome Risk Prediction
Source: Research Square preprint supplement (doi:10.21203/rs.3.rs-7281320/v1), 2025-12-05
Supplement: Supplementary file 1 [file 7c14fc4e5439d27081b5dc4e.xlsx]

## Sheet: ����ѧϰԤ�⵰���򼲲����
住院号	姓名	年龄	性别	年龄分组	学业	城镇	身高	体重	原发性肾脏病种	住院天数	起病时间	血小板	纤维蛋白原	尿IgG	血浆IgG	补体C3	乙肝表面抗体	TSH	总蛋白	血浆白蛋白	前白蛋白	尿素氮	肌酐	血清胱抑素C	总胆固醇	维生素D	ASO	尿蛋白定量	尿蛋白定性	肉眼血尿	HTN	镜下血尿	肾功能异常	尿少	浮肿	肾活检	备注
997440	王娜	9	2	3	3	1	#NULL!	24	2	8	1	318	#NULL!	#NULL!	2.34	0.99	#NULL!	#NULL!	38.7	15.8	184	3.11	34	0.9	11.83	#NULL!	25	6.245	3+	-	+	-	-	+	+
990848	王航宇	13	2	4	4	1	#NULL!	35	2	17	20	288	#NULL!	#NULL!	5.55	0.95	0.01	1.7	46.8	24.3	208	7.82	169	1.7	6.92	#NULL!	81.7	2.08	3+	+	-	+	-	+	+
989828	何润东	3	1	1	1	2	#NULL!	13	2	8	5	325	4.04	#NULL!	4.66	1	2.98	#NULL!	46.2	22	126	1.52	19	0.63	7.12	#NULL!	#NULL!	0.552	3+	+	-	+	-	+	+
989795	牟成政	5	1	2	2	2	#NULL!	20	2	10	20	446	7.26	#NULL!	1.56	1.11	0.45	#NULL!	33	12.5	58	6.48	44	1.32	10.28	#NULL!	#NULL!	2.286	3+	-	+	-	-	-	+
989306	杨尔召	10	1	3	3	1	#NULL!	24.5	2	12	7	341	#NULL!	#NULL!	2.29	0.67	0.01	#NULL!	43.9	19.4	300	5.84	63	1.23	7.58	#NULL!	52.2	11.657	3+	-	+	-	-	+	+
988596	梅浩	6	1	2	2	1	#NULL!	17	2	7	15	449	6.44	#NULL!	2.88	1.28	18.78	#NULL!	42.9	17.7	#NULL!	2.57	40	1.11	8.67	#NULL!	25	13.138	3+	-	-	-	-	+	+
985180	吴锦可	3	1	1	1	2	#NULL!	17	2	18	12	867	#NULL!	#NULL!	1.53	0.97	#NULL!	#NULL!	36.1	10.3	45	7.28	65	2.11	20.71	#NULL!	#NULL!	7.416	3+	-	+	-	-	-	+
982233	周健	13	1	4	4	1	#NULL!	43	2	6	33	297	3.8	#NULL!	3.53	1	0.25	#NULL!	46.9	25.6	270	3.16	54	1.17	9.73	#NULL!	#NULL!	4.434	3+	-	-	+	-	+	+
980205	刘辰玉	1	2	1	1	1	#NULL!	9	2	14	3	623	#NULL!	#NULL!	2.43	1.56	29.82	#NULL!	40.5	16.1	110	2.83	26	1.09	11	#NULL!	#NULL!	#NULL!	3+	-	+	-	-	+	+
979576	周文杰	12	1	3	4	2	#NULL!	46	2	18	8	231	8.42	#NULL!	1.52	1.01	397.35	#NULL!	38.5	14.6	210	6	55	1.14	12.29	#NULL!	#NULL!	5.88	3+	-	+	-	-	-	+
974171	赵祥念	9	2	3	3	1	#NULL!	23	2	8	14	377	6.12	#NULL!	2.67	0.89	35.74	#NULL!	51.5	19.4	256	4.95	43	1.75	15.42	#NULL!	110	1.218	3+	-	-	-	-	+	+
970116	邹钰檬	3	2	1	1	2	#NULL!	16	2	10	15	278	#NULL!	#NULL!	0.99	1.12	0.01	#NULL!	33.9	13.3	84	7.18	41	1.17	9.43	#NULL!	#NULL!	2.062	3+	+	+	-	-	-	+
966877	何帅帅	3	1	1	1	1	#NULL!	17.5	2	36	3	519	#NULL!	#NULL!	0.33	0.85	0.01	#NULL!	35.1	10.1	58	4.26	26	1.13	17.36	#NULL!	#NULL!	3.562	3+	+	+	-	-	-	+
966127	万乐	15	1	4	4	2	#NULL!	53	2	10	14	719	#NULL!	#NULL!	2.1	1.07	#NULL!	#NULL!	36.2	11.6	334	4.99	49	0.97	12.7	#NULL!	25	4.246	3+	-	-	-	-	+	+
966125	骆艺红	6	2	2	2	2	#NULL!	20.5	2	10	11	431	#NULL!	#NULL!	4.87	1.11	1.62	#NULL!	42.5	18.9	136	8.36	61	1.12	5	#NULL!	25	2.056	3+	+	-	+	-	+	+
964248	熊三	13	1	4	4	2	#NULL!	35	2	14	6	305	#NULL!	#NULL!	2.53	0.87	0.7	#NULL!	37.9	13.1	84	3.3	37	0.8	10.46	#NULL!	#NULL!	3.715	2+	-	+	-	-	+	+
957951	刘国亮	4	1	2	2	2	#NULL!	16	2	21	7	87	#NULL!	#NULL!	0.72	0.95	21.76	#NULL!	30.8	9.6	40	9.13	39	1.08	10	#NULL!	#NULL!	2.747	3+	+	+	-	-	-	+
957083	王馨诚	3	1	1	1	2	#NULL!	14	2	11	9	377	8.67	#NULL!	1.62	1.37	0.51	#NULL!	36.9	13.4	50	1.95	22	0.95	8.46	#NULL!	#NULL!	1.609	3+	-	+	-	-	-	+
955140	黄跃顺	5	1	2	2	2	#NULL!	42	2	12	4	420	#NULL!	#NULL!	2.03	1.21	1.26	#NULL!	37.9	13.9	148	4.82	33	1.16	8.09	#NULL!	25	1.535	3+	-	-	-	-	+	+
953233	张松兰	3	1	1	1	1	#NULL!	13.5	2	26	7	399	#NULL!	#NULL!	1.47	1.14	112.61	#NULL!	36.6	13.3	73	4.27	30	1.04	13.75	#NULL!	#NULL!	4.087	3+	+	+	-	-	-	+
952515	朱盛涵	3	1	1	1	1	#NULL!	15.5	2	25	4	151	7.04	#NULL!	1.57	1.17	12.1	#NULL!	30.4	8.8	59	10.05	42	1.76	9.72	#NULL!	25	2.289	3+	-	+	-	-	-	+
951049	王雪鑫	4	2	2	2	2	#NULL!	17	2	10	30	538	#NULL!	#NULL!	0.99	0.97	1.24	#NULL!	40.9	12.4	89	3.12	25	0.94	14.56	#NULL!	25	2.289	3+	+	+	-	-	-	+
949991	杨毅	13	1	4	4	1	#NULL!	30	2	10	7	322	#NULL!	#NULL!	3.49	0.96	0.21	#NULL!	39.5	13.2	173	3.51	41	0.96	11.72	#NULL!	25	4.665	3+	-	-	-	-	+	+
934434	张胜海	1	1	1	1	2	#NULL!	10	2	14	5	502	#NULL!	#NULL!	4.07	1.27	16.73	#NULL!	39.7	15.4	219	2.06	25	0.95	10.78	#NULL!	#NULL!	1.526	3+	-	-	+	-	+	+
929146	赵秋玉	8	2	3	3	2	#NULL!	26	2	22	30	334	#NULL!	#NULL!	4.8	1.56	1.21	#NULL!	40.4	14.3	298	#NULL!	#NULL!	#NULL!	8.17	#NULL!	8.7	2.568	3+	+	-	+	-	+	+
926858	刘羽森	4	1	2	2	2	#NULL!	16	2	14	9	302	#NULL!	#NULL!	2.35	1.22	0.53	#NULL!	42.7	15.7	105	20.33	69	1.56	10.21	#NULL!	12.4	1.637	3+	-	+	-	-	+	+
925264	刘兴宇	13	1	4	4	2	#NULL!	40	2	31	61	138	#NULL!	#NULL!	1.43	0.57	0.05	#NULL!	33.6	11.4	161	6.04	63	1.22	13.43	#NULL!	#NULL!	10.176	3+	+	+	-	-	-	+
925050	何帅帅	3	1	1	1	1	#NULL!	15	2	19	17	446	#NULL!	#NULL!	2.06	1.7	#NULL!	#NULL!	44.2	16.3	83	3.07	28	0.74	9.27	#NULL!	10.7	2.893	3+	-	-	-	-	+	+
922145	周杨培瑜	3	1	1	1	2	#NULL!	14	2	22	13	292	#NULL!	#NULL!	2.01	0.73	50.61	#NULL!	36.6	14.4	97	3.4	19	1.03	7.36	#NULL!	7.6	2.286	3+	-	-	-	-	+	+
909354	张小敏	13	2	4	4	2	#NULL!	32	2	12	4	359	#NULL!	#NULL!	3.23	0.75	2.93	#NULL!	34.5	14.2	157	2.89	52	1.04	14.29	#NULL!	24.7	5.102	3+	-	-	-	-	+	+
906220	王建龙	9	1	3	3	2	#NULL!	29	2	12	30	427	#NULL!	#NULL!	2.79	0.83	0.93	#NULL!	41.1	12.5	83	3.79	47	1.04	17.27	#NULL!	3.2	2.045	3+	-	-	-	-	+	+
900011	张雪	2	2	1	1	1	#NULL!	14	2	22	10	217	#NULL!	#NULL!	2.89	1.01	81.03	#NULL!	38.7	13.4	85	6.29	28	1.18	11.15	#NULL!	9	3.349	3+	-	-	-	-	+	+
798010	王力力	13	1	4	4	2	#NULL!	33.5	2	10	10	464	#NULL!	#NULL!	4.34	1.16	94.87	#NULL!	52.6	27.7	377	#NULL!	#NULL!	#NULL!	8.28	#NULL!	108.5	2.929	3+	-	-	+	-	+	+
796464	左静默	10	1	3	3	2	#NULL!	26	2	10	7	246	#NULL!	#NULL!	5.06	0.91	237.31	#NULL!	48	25.7	258	3.59	32	1.01	8.59	#NULL!	179.3	1.498	3+	+	-	+	-	+	+
796212	夏银松	7	1	2	2	1	#NULL!	22	2	7	3	268	#NULL!	#NULL!	3.77	1.02	#NULL!	#NULL!	42.5	20.8	215	7.79	44	1.2	6.46	#NULL!	21.3	#NULL!	3+	-	-	+	-	+	+
795146	王豪	8	1	3	3	1	#NULL!	27.5	2	16	30	209	#NULL!	#NULL!	2.43	1	0.01	#NULL!	39.1	16.3	209	2.99	25	1.08	10.76	#NULL!	21.9	4.143	3+	-	+	-	-	+	+
787932	何佳玉	10	2	3	3	2	#NULL!	30	2	21	30	327	#NULL!	#NULL!	4.18	0.95	#NULL!	#NULL!	42.4	25.4	339	4.06	51	1	5.29	#NULL!	385.5	2.244	3+	+	-	+	-	+	+
785616	王爱文	8	1	3	3	2	#NULL!	22	2	13	8	477	#NULL!	#NULL!	5.06	1.47	#NULL!	#NULL!	51.7	18.1	368	4.96	41	1.08	8.97	#NULL!	#NULL!	2.422	3+	+	-	+	-	+	+
785443	王开雯	11	1	3	3	2	#NULL!	32	2	8	30	214	#NULL!	#NULL!	2.43	0.82	#NULL!	#NULL!	46.2	24	532	10.95	85	1.37	6.83	#NULL!	71.6	#NULL!	3+	-	-	-	-	+	+
785134	汪丹婷	8	2	3	3	2	#NULL!	35	2	29	10	292	#NULL!	#NULL!	1.07	0.59	6.19	#NULL!	28.8	7.8	25	2.52	23	0.92	13.44	#NULL!	14.2	7.282	3+	+	+	-	-	-	+
782855	谢湘莹	4	2	2	2	1	#NULL!	16	2	10	2	481	#NULL!	#NULL!	3.32	2.15	#NULL!	#NULL!	48.5	22.1	446	3.44	46	1.27	11.18	#NULL!	#NULL!	#NULL!	3+	-	-	-	-	+	+
782853	赵辉	11	1	3	3	2	#NULL!	34	2	21	30	327	#NULL!	#NULL!	3.32	0.81	7.75	#NULL!	35.3	13.1	105	7.17	47	1.08	16.32	#NULL!	28.8	4.501	3+	-	-	-	-	+	+
780923	梁子豪	2	1	1	1	1	#NULL!	26	2	20	8	387	#NULL!	#NULL!	2.34	1.28	2	#NULL!	38.2	12	178	6.31	22	1.83	11.31	#NULL!	12.3	2.168	3+	-	+	-	-	+	+
775875	幸小盛	4	1	2	2	2	#NULL!	17	2	16	30	326	#NULL!	#NULL!	2.27	0.99	#NULL!	#NULL!	43.3	14.3	284	#NULL!	#NULL!	#NULL!	8.78	#NULL!	#NULL!	1.485	3+	-	-	-	-	+	+
775033	刘羿磊	2	2	1	1	2	#NULL!	15	2	20	4	380	#NULL!	#NULL!	2.37	#NULL!	11.83	#NULL!	49.7	15	269	4.67	32	1.01	11.25	#NULL!	8.7	3.498	3+	-	+	-	-	+	+
773291	苟文杰	5	2	2	2	2	#NULL!	18	2	7	9	483	#NULL!	#NULL!	5.28	1.32	#NULL!	#NULL!	41.5	16	159	4.67	26	1.11	8.8	#NULL!	#NULL!	2.696	3+	+	-	+	-	+	+
770969	张摇	2	1	1	1	2	#NULL!	12	2	18	10	673	#NULL!	#NULL!	2.38	1	#NULL!	#NULL!	31.7	10.2	#NULL!	1.07	22	1.22	10.48	#NULL!	#NULL!	1.148	3+	-	+	-	-	+	+
767184	李玉凌	4	2	2	2	1	#NULL!	12	2	14	10	202	#NULL!	#NULL!	4.68	0.76	2	#NULL!	34.9	12.2	59	6.02	28	1.26	12.87	#NULL!	2.1	2.888	3+	+	-	+	-	+	+
766083	肖钰	8	1	3	3	1	#NULL!	22	2	14	7	333	#NULL!	#NULL!	3.23	1.02	2.9	#NULL!	38	14.3	63	3.21	31	0.56	11.44	#NULL!	12.3	4.038	3+	-	-	-	-	+	+
764316	王梦银	2	1	1	1	1	#NULL!	13	2	28	6	507	#NULL!	#NULL!	3	1.35	#NULL!	#NULL!	35.7	14.2	69	2.57	30	0.57	9.56	#NULL!	2.3	3.728	3+	-	-	-	-	+	+
762547	袁庆	9	2	3	3	2	#NULL!	25	2	10	90	436	#NULL!	#NULL!	4.44	0.76	#NULL!	#NULL!	40.5	14	322	1.75	27	0.54	16.38	#NULL!	#NULL!	4.18	3+	+	-	+	-	+	+
761721	苏沄堰	9	2	3	3	2	#NULL!	22.5	2	15	30	336	#NULL!	#NULL!	2.54	0.77	#NULL!	#NULL!	39.6	12.8	131	4.55	50	1.13	15.78	#NULL!	5	2.278	3+	-	+	-	-	+	+
760529	罗雪松	12	1	3	4	1	#NULL!	21	2	25	30	325	#NULL!	#NULL!	2.97	1.21	#NULL!	#NULL!	46.1	19.3	516	7.94	44	1.4	15.18	#NULL!	32.7	5.288	3+	-	-	-	-	+	+
757894	王雨婕	9	2	3	3	2	#NULL!	34	2	10	7	272	#NULL!	#NULL!	2.23	#NULL!	#NULL!	7.563	65	12.1	66	4.6	34	0.78	14.97	#NULL!	#NULL!	3.288	3+	-	-	-	-	+	+
756576	杨成义	2	1	1	1	1	#NULL!	10	2	13	10	493	#NULL!	#NULL!	1.85	0.69	#NULL!	#NULL!	33.8	12.9	91	2.61	15	0.63	12.64	#NULL!	2	0.977	3+	-	-	-	-	+	+
754922	张洋洋	13	1	4	4	1	#NULL!	38	2	23	15	204	#NULL!	#NULL!	3.04	1.09	#NULL!	#NULL!	53.2	33.2	480	5.41	49	0.8	7.32	#NULL!	38.5	7.34	3+	-	-	-	-	+	+
751754	罗腾	12	1	3	4	2	#NULL!	34	2	9	30	344	#NULL!	#NULL!	3.18	1.21	#NULL!	#NULL!	41.5	14.2	224	3.44	43	0.76	14.23	#NULL!	#NULL!	4.648	3+	-	-	-	-	+	+
751468	蒋光宇	11	1	3	3	1	#NULL!	30	2	10	4	189	#NULL!	#NULL!	7.66	0.8	#NULL!	#NULL!	53.9	29.4	161	21.2	136	1.3	7.62	#NULL!	31.2	7.17	3+	-	-	+	-	+	+
751236	罗永聂	11	2	3	3	1	#NULL!	36	2	12	15	205	#NULL!	#NULL!	3.04	0.91	#NULL!	#NULL!	45.2	13.6	447	4.79	50	0.58	11.06	#NULL!	10.8	2.699	3+	-	-	-	-	+	+
747552	张航	3	1	1	1	2	#NULL!	14	2	18	5	260	#NULL!	#NULL!	1.81	1.57	76	#NULL!	39.3	13.6	63	3.63	22	0.66	13.29	#NULL!	9.4	3.54	3+	-	-	-	-	-	+
742225	田鸿宇	4	1	2	2	1	#NULL!	16	2	8	60	419	#NULL!	#NULL!	3.25	1.32	#NULL!	#NULL!	48.9	23.8	#NULL!	3.5	25	0.73	7.57	#NULL!	4	1.56	3+	-	-	-	-	+	+
736814	刘叶	14	2	4	4	1	#NULL!	44	2	10	7	164	#NULL!	#NULL!	3.46	1.26	#NULL!	#NULL!	40.2	19.7	185	3.1	33	#NULL!	8.73	#NULL!	12.3	4.85	3+	-	-	-	-	+	+
733751	谢先富	3	1	1	1	1	#NULL!	19	2	12	5	304	#NULL!	#NULL!	2.21	1.38	2	#NULL!	40.1	13.7	270	3.9	43	#NULL!	8.93	#NULL!	1	4.75	3+	-	-	-	-	+	+
733536	何诗婷	3	2	1	1	1	#NULL!	19	2	23	15	694	#NULL!	#NULL!	1.65	0.98	11.4	#NULL!	34	11.1	30	3.5	25	#NULL!	13.01	#NULL!	34.9	9.3	3+	-	+	-	-	-	+
727070	侯俊豪	3	1	1	1	1	#NULL!	13	2	21	3	298	#NULL!	#NULL!	1.46	1.02	#NULL!	#NULL!	34.5	12.6	#NULL!	2.43	22	#NULL!	13.58	#NULL!	4.9	2.61	3+	+	+	-	-	-	+
717998	夏爽	11	1	3	3	1	#NULL!	43	2	16	10	369	#NULL!	#NULL!	3	0.86	#NULL!	#NULL!	53.7	23.5	369	6.22	52	#NULL!	14.23	#NULL!	33.8	2.77	3+	+	-	+	-	+	+
716100	赵福建	10	1	3	3	2	#NULL!	22	2	15	5	392	#NULL!	#NULL!	4.72	0.91	#NULL!	#NULL!	52.3	33.8	141	2.23	38	#NULL!	5.71	#NULL!	13.2	1.79	3+	+	-	+	-	+	+
715714	邹子龙	12	1	3	4	1	#NULL!	35	2	10	7	384	#NULL!	#NULL!	4.83	1.75	#NULL!	#NULL!	43.2	13.8	76	#NULL!	#NULL!	#NULL!	10.4	#NULL!	2.7	2.61	3+	+	-	+	-	+	+
715483	梁俊豪	2	1	1	1	1	#NULL!	15	2	21	10	432	#NULL!	#NULL!	1.91	0.63	2	#NULL!	34.6	13.7	99	3.45	23	#NULL!	11.59	#NULL!	0.1	2.27	3+	-	-	-	-	+	+
714628	满扬	9	1	3	3	2	#NULL!	35.5	2	18	10	258	#NULL!	#NULL!	4.83	0.87	#NULL!	#NULL!	38.6	16.1	236	4.37	42	#NULL!	8.53	#NULL!	2.3	3.37	3+	+	-	+	-	+	+
713577	田玲	9	2	3	3	2	#NULL!	20	2	11	10	397	#NULL!	#NULL!	3.38	1.25	#NULL!	#NULL!	36.9	16.2	140	3.2	34	#NULL!	10.94	#NULL!	#NULL!	1.08	3+	-	-	-	-	+	+
712757	王洪麒	11	1	3	3	1	#NULL!	31	2	14	15	258	#NULL!	#NULL!	7.2	0.89	#NULL!	#NULL!	44.9	21.1	157	4.46	83	7.92	#NULL!	#NULL!	1.3	1.69	3+	-	-	+	-	+	+
709770	刘年松	11	1	4		1	#NULL!	38	2	26	3	444	#NULL!	#NULL!	4.32	0.71	2	#NULL!	25	7.7	18	9.23	60	#NULL!	11.53	#NULL!	#NULL!	4.95	3+	-	-	+	-	+	+
708999	梅柏绿	8	1	3	3	1	#NULL!	33	2	16	10	324	#NULL!	#NULL!	2.83	0.96	#NULL!	#NULL!	30.7	11.3	52	3.66	33	#NULL!	12.07	#NULL!	5.1	4.39	3+	-	-	-	-	+	+
705530	王佳艳	7	2	2	2	1	#NULL!	18.5	2	13	15	459	#NULL!	#NULL!	3.34	0.79	#NULL!	#NULL!	34.3	13.5	107	2.25	23	#NULL!	10.47	#NULL!	5.6	#NULL!	3+	-	-	-	-	+	+
705104	冷志寒	2	1	1	1	2	#NULL!	12.5	2	13	17	263	#NULL!	#NULL!	3.03	1.23	#NULL!	#NULL!	47.7	16.3	399	3.71	18	#NULL!	9.33	#NULL!	#NULL!	1.87	3+	-	-	-	-	+	+
699943	田子轩	5	1	2	2	1	#NULL!	20	2	20	37	519	#NULL!	#NULL!	2.04	1.01	#NULL!	#NULL!	42.3	20.9	209	3.31	23	#NULL!	11.04	#NULL!	1.6	2.89	3+	-	-	-	-	+	+
699126	张丝玉	10	2	3	3	2	#NULL!	26.5	2	20	10	408	#NULL!	#NULL!	8.4	0.75	#NULL!	#NULL!	51.3	19.5	175	20.1	94	#NULL!	7.42	#NULL!	586.3	8.34	3+	-	-	+	-	+	+
688074	邹顺舟	5	1	2	2	1	#NULL!	19.5	2	19	15	389	5.61	#NULL!	6.92	1.85	#NULL!	#NULL!	53.9	23.1	34	10.7	204	#NULL!	6.2	#NULL!	#NULL!	2.37	3+	-	-	+	-	+	+
686023	李杰	13	1	4	4	1	#NULL!	40	2	12	33	#NULL!	5.67	#NULL!	4.31	0.25	27.89	#NULL!	38.2	26.4	265	24.69	343	#NULL!	6.73	#NULL!	#NULL!	3.34	3+	-	-	+	-	+	+
684784	林国旺	4	2	2	2	1	#NULL!	13.5	2	12	10	321	#NULL!	#NULL!	3.56	1.46	#NULL!	#NULL!	45.3	20.6	106	3.24	24	#NULL!	4.5	#NULL!	2.1	1.46	3+	-	-	+	-	+	+
684618	张权鑫	11	1	3	3	1	#NULL!	32	2	17	7	139	#NULL!	#NULL!	7.55	1.13	#NULL!	#NULL!	47.3	19.2	#NULL!	#NULL!	#NULL!	#NULL!	6.43	#NULL!	#NULL!	4.74	3+	-	-	+	-	+	+
682139	罗伦进	10	1	3	3	1	#NULL!	25	2	19	7	893	#NULL!	#NULL!	9.87	2.02	#NULL!	#NULL!	55.8	19.7	#NULL!	#NULL!	#NULL!	#NULL!	9.46	#NULL!	#NULL!	2.61	3+	-	-	+	-	+	+
676658	徐诗刚	13	1	4	4	1	#NULL!	42	2	16	7	307	#NULL!	#NULL!	18.73	0.09	#NULL!	#NULL!	63.1	31.3	160	9.22	75	#NULL!	3.2	#NULL!	1075.2	#NULL!	3+	+	+	-	+	+	+
675887	郑代骞	8	1	3	3	1	#NULL!	20	2	19	30	259	#NULL!	#NULL!	6.26	1.12	#NULL!	#NULL!	52.9	26.6	285	2.44	31	#NULL!	6.45	#NULL!	1327.1	#NULL!	1+	+	+	+	-	+	+
673582	谭飘飘	12	2	3	4	1	#NULL!	29	2	12	15	296	#NULL!	#NULL!	2.97	0.87	#NULL!	#NULL!	42.6	19.4	403	2.04	29	#NULL!	11.34	#NULL!	8.2	3.81	3+	-	-	-	-	+	+
672946	田容容	6	2	2	2	1	#NULL!	17	2	10	60	263	#NULL!	#NULL!	4.65	1.04	2	#NULL!	58.6	29.7	396	3.31	24	#NULL!	6.27	#NULL!	2.6	1.17	2+	+	-	+	-	+	+
668640	何悦菲	10	2	3	3	1	#NULL!	28	2	22	7	247	#NULL!	#NULL!	5.95	1.09	#NULL!	#NULL!	39.5	14	169	2.13	39	#NULL!	11.88	#NULL!	6.4	2.85	3+	+	-	+	-	+	+
668057	龙成成	7	1	2	2	1	#NULL!	27	2	17	6	377	#NULL!	#NULL!	2.8	#NULL!	#NULL!	#NULL!	44.9	18	449	7.83	49	#NULL!	9.38	#NULL!	2.4	2.81	3+	-	-	-	-	+	+
666742	李运松	13	1	4	4	1	#NULL!	37	2	48	10	275	2.53	#NULL!	3.27	1.06	#NULL!	#NULL!	39.1	17.7	241	8.04	183	#NULL!	13.32	#NULL!	17.9	5.34	3+	-	-	-	-	+	+
660645	李鹏	13	1	4	4	2	#NULL!	29	2	13	10	332	4.38	#NULL!	4.09	1.04	2	#NULL!	50	23.8	193	#NULL!	#NULL!	#NULL!	9.7	#NULL!	#NULL!	1.63	3+	-	-	+	-	+	+
660042	焦佳源	1	1	1	1	1	#NULL!	11.5	2	21	7	428	6	#NULL!	2.97	0.84	#NULL!	#NULL!	32.5	11.7	162	3.8	33	#NULL!	8.47	#NULL!	1.6	1.79	2+	-	-	-	-	+	+
658636	吴进	12	1	3	4	1	#NULL!	32	2	16	6	263	#NULL!	#NULL!	3.14	1.23	#NULL!	#NULL!	36.6	16.2	183	4.7	49	#NULL!	6.35	#NULL!	18.9	4.06	2+	-	-	-	-	+	+
650435	万光能	13	1	4	4	1	#NULL!	51	2	6	90	223	10.79	#NULL!	2.11	0.93	140	#NULL!	30.2	9.7	5	13.26	176	#NULL!	9.4	#NULL!	#NULL!	1.8	3+	-	-	-	-	+	+
649788	李小纳	14	2	4	4	2	#NULL!	39	2	28	8	386	3.73	#NULL!	1.78	0.58	2	#NULL!	34.2	13.1	169	5.2	51	#NULL!	15.79	#NULL!	3.8	#NULL!	3+	-	-	-	-	-	+
641854	田乐	16	1	4	4	1	#NULL!	56	2	14	2	534	4.89	#NULL!	4.61	1.38	#NULL!	#NULL!	39.5	14.8	211	5.29	59	1.24	10.06	#NULL!	#NULL!	3.133	3+	+	-	+	-	+	+
632804	娄事	8	1	3	3	1	#NULL!	24	2	14	90	484	#NULL!	#NULL!	6.35	0.96	#NULL!	#NULL!	64.7	39.7	253	3.75	29	#NULL!	6.28	#NULL!	#NULL!	#NULL!	3+	-	-	+	-	+	+
632590	王知庆	3	1	1	1	2	#NULL!	16	2	16	6	196	#NULL!	#NULL!	1.13	1.24	#NULL!	#NULL!	40	19.4	#NULL!	#NULL!	#NULL!	#NULL!	7.37	#NULL!	#NULL!	0.94	3+	+	+	-	-	-	+
561783	赖德军	11	1	3	3	2	#NULL!	27	2	26	7	311	#NULL!	#NULL!	14.29	0.01	#NULL!	#NULL!	50.1	23.8	164	15.6	54	#NULL!	4.53	#NULL!	610.6	7.36	3+	+	+	+	-	+	+
548112	杨波	11	2	3	3	2	#NULL!	41	2	25	13	370	#NULL!	#NULL!	2	#NULL!	8.5	#NULL!	32.2	11.3	14	10.7	86	#NULL!	12.15	#NULL!	#NULL!	6.78	2+1	+	+	-	-	-	+
547973	万丽军	13	2	4	4	1	#NULL!	34	2	18	8	335	#NULL!	#NULL!	3.52	1.12	#NULL!	#NULL!	34.6	16.2	111	3	37	#NULL!	11.96	#NULL!	26.8	3.3	2+	-	-	+	-	+	+
547111	杨超	11	2	3	3	2	#NULL!	34	2	26	12	440	#NULL!	#NULL!	1.8	#NULL!	#NULL!	#NULL!	41.9	21.6	56	8.01	67	#NULL!	6.51	#NULL!	#NULL!	4.29	3+	+	+	-	-	-	+
542704	侯江勇	11	2	3	3	2	#NULL!	31	2	22	11	359	#NULL!	#NULL!	5.24	1.36	2	#NULL!	37.9	10.3	92	5.39	51	#NULL!	10.62	#NULL!	24	2.2	3+	+	-	+	-	+	+
539355	吴钱恒	7	2	2	2	2	#NULL!	30	2	46	15	364	6.67	#NULL!	1.4	1.24	94.42	#NULL!	35.9	11.6	76	2.63	22	#NULL!	14.46	#NULL!	#NULL!	4.65	3+	+	-	-	-	-	+
538717	石敏敏	2	1	1	1	1	#NULL!	12	2	30	12	422	#NULL!	#NULL!	2.64	1.3	#NULL!	#NULL!	40.6	18	130	3.21	22	#NULL!	15.2	#NULL!	8.9	2.01	2+	-	-	-	-	+	+
538716	张继红	7	2	2	2	2	#NULL!	26	2	23	9	292	#NULL!	#NULL!	2.86	1.42	2	#NULL!	38.1	16.1	102	20.38	74	#NULL!	10.12	#NULL!	13.1	2.61	3+	-	-	-	-	+	+
535983	田高飞	4	2	2	2	1	#NULL!	14	2	29	8	490	#NULL!	#NULL!	2.44	1.38	2	#NULL!	36.9	13.2	104	5.5	37	#NULL!	9.8	#NULL!	#NULL!	2.17	3+	-	-	-	-	+	+
535344	胡安贵	13	2	4	4	2	#NULL!	38	2	12	7	214	#NULL!	#NULL!	3.78	0.25	311.6	#NULL!	64.2	11.6	360	29.9	116	#NULL!	10.95	#NULL!	#NULL!	5.38	3+	-	-	-	+	+	+
533507	王立阳	5	2	2	2	1	#NULL!	22	2	29	10	228	#NULL!	#NULL!	4.09	1.41	#NULL!	#NULL!	39.2	18.6	96	4.05	37	#NULL!	6.47	#NULL!	20.1	3.98	2+	-	-	+	-	+	+
2009323	林何	13	1	4	4	2	#NULL!	55	2	12	15	245	6.99	55.9	2.4	0.98	2.586	8.371	51.7	14.8	404	8.6	57	#NULL!	19.05	3	29.6	14.82	3+	-	+	-	-	-	+
2008855	朱顺利	2	1	1	1	2	#NULL!	15	2	8	100	597	5.29	#NULL!	2.9	1.11	1.42	#NULL!	40	17.8	114	3	24	0.63	11.95	18	#NULL!	1.37	3+	-	-	-	-	-	+
2007587	张佳婷	3	2	2	2	2	#NULL!	16	2	12	150	415	9.28	34.5	1.1	0.94	39.959	#NULL!	35.5	14.4	62	14.6	79	#NULL!	10.76	14.6	25	2.18	3+	-	-	+	-	+	+
2006903	青晓锐	7	1	3	3	1	#NULL!	32.5	2	14	7	375	6.22	6.2	2.1	1.16	20.52	6.912	33.5	13.7	101	14	53	#NULL!	11.72	#NULL!	26.8	1.44	3+	-	-	+		-	+
2002314	淳欣钰	2	13	4	3	2	#NULL!	35	2	8	60	345	4.45	2.4	5.5	#NULL!	1.59	2.255	49	26.9	231	4.1	50	#NULL!	5.5	#NULL!	#NULL!	2.87	3+	-	-	+	-	-	+
1993257	皮宇辰	3	1	2	1	1	#NULL!	17	2	3	3	567	#NULL!	1.6	4.2	1.68	54.03	#NULL!	43.8	21	133	3.2	26	0.72	#NULL!	#NULL!	#NULL!	1.21	3+	-	-	-	-	-	+
1983387	杨承煜	8	1	3	3	2	#NULL!	40	2	6	7	418	4.24	2.1	3.4	0.8	1.335	10.5	38	17.4	129	2.5	32	0.81	8.82	13.2	51.5	1.51	3+	-	+	+	-	+	+
1979919	万思颖	10	2	3	3	2	#NULL!	27	2	6	10	432	4.11	2.1	3.7	1.03	0.4	17.372	37.3	20.1	147	3.8	52	#NULL!	9.17	6.2	88.2	2.83	3+	-	-	-	-	+	+
1977311	周傲然	13	1	4	4	2	#NULL!	51	2	7	7	450	3.41	1	3.4	0.73	1.74	#NULL!	29.3	15.2	139	6.2	69	#NULL!	13.15	3	#NULL!	6.93
1976201	李梓萱	8	2	3	3	2	#NULL!	32	2	6	3	350	7.27	26.6	5.3	1.69	6.56	6.816	39.3	16.2	104	3	43	#NULL!	11.18	3.9	#NULL!	4.15
1975279	韩雨萱	8	2	3	3	2	#NULL!	30	2	9	3	442	8.02	10.9	4.2	1.36	12.688	3.314	36.1	14.1	73	4	41	#NULL!	9	#NULL!	25	3.39
1968289	刘俊希	8	1	3	3	2	#NULL!	32	2	7	1	263	5.57	5.1	3	0.99	38.81	7.16	38.5	18	140	7.5	46	#NULL!	7.99	#NULL!	#NULL!	4.37
1962494	杨青格格	4	2	2	2	2	#NULL!	17.5	2	8	7	261	5.24	10.9	5.5	0.77	103.54	6.27	47.5	23.2	91	11.7	52	#NULL!	6.16	15	#NULL!	#NULL!
1960165	杨博豪	1	1	1	1	2	#NULL!	11	2	53	15	613	5.86	#NULL!	0.33	#NULL!	#NULL!	13.4	28.8	10.9	76	6	23	#NULL!	8.54	3.22	#NULL!	1.55
1959331	代梓康	3	1	1	1	1	#NULL!	20	2	5	30	572	7.81	#NULL!	2.3	1.1	#NULL!	#NULL!	42.7	21.3	204	3.2	27	#NULL!	9.75	#NULL!	#NULL!	1.28
1943208	刘民熙	2	1	1	1	2	#NULL!	13	2	8	15	498	7.87	#NULL!	0.6	0.8	157.27	#NULL!	33	10.8	96	4.6	31	#NULL!	18.14	#NULL!	#NULL!	6.08
1941823	赵欣悦	3	2	1	1	2	#NULL!	13.5	2	14	7	639	5.07	77.6	1.5	1.29	2.807	#NULL!	62.3	17.7	132	2.1	31	#NULL!	14.65	#NULL!	#NULL!	2.17
1940313	母宇阳	6	1	2	2	2	#NULL!	32	2	19	10	302	5.78	4.4	3.1	1.51	3.77	13.8	36	16.3	92	2.2	31	#NULL!	6.26	#NULL!	106	5.94
1938670	汪莎	12	2	3	4	2	#NULL!	75	2	3	15	398	3.19	5.6	8.2	1.16	#NULL!	#NULL!	62.1	37.6	363	3.3	57	#NULL!	6.9	8.5	#NULL!	#NULL!
1938095	吕亦辰	2	1	1	1	2	#NULL!	16.5	2	9	3	370	6.21	10.3	1.5	1.15	2.93	#NULL!	34.9	12.3	51	3.3	31	#NULL!	11.4	#NULL!	#NULL!	#NULL!
1936820	邹诗航	8	1	3	3	2	#NULL!	32	2	8	4	333	5.55	0.4	3.2	1.16	2.488	16.5	35.3	15.1	65	2.1	34	#NULL!	8.61	#NULL!	75.4	1.3
1931666	明思成	13	1	4	4	1	#NULL!	90	2	8	4	228	4.64	4.7	3.8	1.22	3.21	#NULL!	38.4	18.1	226	3.4	77	#NULL!	7.34	4	25	8.42			-
1929376	孙明彬	1	1	1	1	1	#NULL!	12	2	8	15	325	6.65	1.1	1.4	1.24	15.04	#NULL!	33.31	13.3	123	4.4	19	#NULL!	9.84	3.6	#NULL!	2.95
1927976	刘宇丞	13	1	4	4	1	#NULL!	47	2	6	11	436	5.54	11.8	3.6	1.34	1.317	#NULL!	36.2	18.3	145	5.2	54	#NULL!	11.45	#NULL!	25	4.15
1926130	罗铭昱	4	1	2	2	2	#NULL!	17	2	5	4	390	6.21	4.2	2.8	1.09	0.001	7.439	37.9	16.3	93	3.2	22	#NULL!	8.85	#NULL!	25	2.38
1925572	敖雪翎	4	2	2	2	1	#NULL!	20	2	3	3	348	2.95	2.9	1.7	0.7	2.03	#NULL!	35.3	20.5	156	3.2	32	#NULL!	9.13	#NULL!	25	3.5
1925191	袁锌剑	7	1	2	2	1	#NULL!	19	2	15	3	472	8.82	#NULL!	0.88	1.58	0.28	#NULL!	45.4	18.1	78	1.6	25	#NULL!	10.15	#NULL!	#NULL!	#NULL!
1917563	汤富尧	4	1	2	2	1	#NULL!	19	2	6	10	393	5.59	0.4	5.3	1.14	1.85	8.523	39.3	22.9	126	3.3	36	#NULL!	11.79	#NULL!	25	3.19
1917555	李博文	6	1	2	2	2	#NULL!	24	2	9	20	342	4.39	6.4	5.5	1.13	23.055	#NULL!	48.8	24.5	192	#NULL!	#NULL!	#NULL!	9.02	#NULL!	#NULL!	2.03
1917262	梁煜晨	3	1	1	1	1	#NULL!	15	2	10	4	209	4.51	2.9	5.2	1.09	971.65	#NULL!	47.7	21.6	146	2.9	25	#NULL!	6.19	#NULL!	25	0.37
1913531	龚依琳	10	2	3	3	2	#NULL!	31	2	18	2	306	6.16	51.9	2.8	0.6	1.45	#NULL!	32	13.4	68	8.9	51	#NULL!	12.67	#NULL!	25	7.79
1913494	张浩	10	1	3	3	2	#NULL!	28	2	21	10	440	1.88	18.7	3.9	0.74	1.095	#NULL!	44.6	18.9	248	10.4	65	#NULL!	6.54	5.4	#NULL!	7.31
1910647	胡全敏	8	2	3	3	2	#NULL!	26	2	6	7	592	6.44	#NULL!	3.2	1.12	1.794	#NULL!	41.5	15.1	164	5.4	50	#NULL!	17.18	#NULL!	#NULL!	#NULL!
1909725	周勇康	10	1	3	3	2	#NULL!	26	2	19	7	367	6.21	144	2.8	0.89	7.36	#NULL!	33.8	14.3	52	10.1	99	#NULL!	11.03	#NULL!	#NULL!	4.02
1908099	李明骏	8	1	3	3	1	#NULL!	40	2	10	4	435	5.94	#NULL!	2.8	1.42	1000	#NULL!	40.4	15.4	79	2.8	38	#NULL!	11.87	#NULL!	25	#NULL!
1907089	宋思妍	3	1	1	1	2	#NULL!	16	2	7	4	448	5.54	#NULL!	1.5	#NULL!	70.5	#NULL!	#NULL!	14.4	#NULL!	#NULL!	#NULL!	#NULL!	13.93	#NULL!	#NULL!	1.47
1905427	郭家瑞	1	1	1	1	2	#NULL!	13.9	2	19	7	416	5.41	9.4	0.55	0.77	40.09	#NULL!	34.4	9.6	54	5.5	24	#NULL!	11.29	7.2	25	#NULL!
1900585	林宸伊	1	2	1	1	1	#NULL!	18	2	5	2	436	6.69	6	3.2	1.28	3.91	#NULL!	44.2	17.7	56	3.5	25	#NULL!	6.72	10.7	25	2.32
1888078�	陈宇涵	3	1	1	1	2	#NULL!	17	2	10	5	399	5.94	#NULL!	1.2	1.21	4.8	#NULL!	33.5	14	75	2.9	29	0.94	11.57	#NULL!	#NULL!	3.53
1882117	姚景浩	1	1	1	1	1	#NULL!	27	2	6	4	484	5.29	10.7	3.1	1.15	7.48	#NULL!	39.6	15.8	129	6.2	37	#NULL!	9.7	3	#NULL!	3.05
1876996	夏筠汐	6	2	2	2	1	#NULL!	21	2	5	14	478	8.59	1.6	6.6	1.22	23.383	9.51	43.7	20.1	108	4.2	32	#NULL!	10.14	10.7	25	3.81	3+	-	-	-	-	-	+
1871091	王家豪	8	1	3	3	2	#NULL!	26	2	5	20	373	4.73	0.6	3.6	1.15	11.59	#NULL!	40.6	19.4	223	1.8	25	#NULL!	8.57	#NULL!	55.7	2.97
1870703	周雨	4	2	2	2	2	#NULL!	20	2	10	7	383	5.54	11.8	0.9	0.86	2.76	#NULL!	30.8	17	15	10.3	65	#NULL!	10.78	#NULL!	101.85	5.17
1870033	龙建安	7	1	2	2	2	#NULL!	37	2	4	7	357	6.21	18.2	1.1	0.78	1.43	#NULL!	44	12.4	60	16.3	141	1.57	8.81	#NULL!	#NULL!	#NULL!
1868708	杨雨飞	3	1	1	1	1	#NULL!	15	2	9	20	266	5.24	0.3	2.1	1.16	#NULL!	#NULL!	43.2	22.3	267	4.3	32	#NULL!	8.18	#NULL!	#NULL!	3.213
1866928	谢川辰	8	1	3	3	1	#NULL!	40	2	9	5	342	5.94	17.6	2.3	1.33	3.136	#NULL!	42.2	18.7	154	4.9	32	0.39	13.84	#NULL!	#NULL!	5.23
1866484	刘应然	7	1	2	2	2	#NULL!	25	2	5	10	370	5.03	9.9	1.9	0.87	2.91	#NULL!	39.3	15.8	46	5.9	27	0.72	11.42	3	#NULL!	3.77
1866209	李亿豪	5	1	2	2	2	#NULL!	19	2	6	4	346	5.18	16.8	4.6	0.79	99.476	#NULL!	43.6	21.6	117	4	28	#NULL!	7.58	#NULL!	51.9	5.19
1862920	李登源	5	1	2	2	1	#NULL!	20	2	26	4	279	1.91	#NULL!	5.8	0.62	#NULL!	3.07	43.9	16.9	69	24.8	159	#NULL!	3.17	#NULL!	#NULL!	6.24
1862877	张春勇	4	1	2	2	2	#NULL!	19	2	6	30	343	5.99	0.7	2.7	1.01	17.743	#NULL!	41.7	20.5	79	3.6	43	#NULL!	9.94	3	25	2.96
1858730	令狐林	12	1	3	4	2	#NULL!	40	2	16	7	266	5.07	81	2.7	0.92	68.76	#NULL!	31.2	16	92	3.5	47	#NULL!	9.24	7.1	25	1.49
1850995	杨浩宇	11	1	3	3	2	#NULL!	51	2	14	10	432	6.69	13.9	1.3	0.77	3.62	#NULL!	37.2	13	59	7.8	98	#NULL!	18.07	#NULL!	#NULL!	#NULL!
1830218	文思绮	4	2	2	2	1	#NULL!	21	2	7	30	421	5.71	12	1.6	1.01	1.43	#NULL!	31	12.7	12	2.6	24	#NULL!	9.67	#NULL!	25	3.21
1823906	侯诗语	1	2	1	1	1	#NULL!	12	2	7	20	490	9.24	0.7	1.5	1.24	189.24	#NULL!	37	16.6	58	4.3	25	#NULL!	11.63	5.1	#NULL!	#NULL!
1795716	陈帝森	4	1	2	2	1	#NULL!	18.5	2	15	10	322	#NULL!	2.7	3.1	1.02	6.61	#NULL!	36.7	16.4	76	4.5	29	0.87	7.59	#NULL!	25	#NULL!
1745041	喻粢安	3	1	1	1	2	#NULL!	20	2	7	5	681	6.99	116.58	5.3	1.08	9.44	#NULL!	42	19.3	98	5	33	0.72	8.32	5.5	#NULL!	6
1740368	张国豪	11	2	3	3	2	#NULL!	40	2	18	3	574	6.99	#NULL!	3.3	1.1	#NULL!	#NULL!	30.8	11.7	34	6.3	72	0.95	13.55	#NULL!	74	6.44	3+	-	-	-	-	+	+
1737045	陆立进	9	2	3	3	2	#NULL!	44	2	8	20	339	3.96	#NULL!	2	1	95.45	#NULL!	36.3	15	278	4.2	47	1.05	11.3	#NULL!	#NULL!	2.55	3+	-	-	-	-	+	+
1736682	林煜庭	11	2	3	3	2	#NULL!	37	2	16	15	268	2.18	#NULL!	3.5	0.9	3.92	#NULL!	36.1	14	112	9.2	55	1.01	11.24	#NULL!	46.1	4.98	3+	-	-	+	-	+	+
1734698	马天放	5	2	2	2	2	#NULL!	25	2	4	2	314	5.64	#NULL!	3.8	1.04	136.518	#NULL!	41.2	21.1	115	2.6	36	0.76	8.56	#NULL!	25	2.14	3+	-	-	+	-	+	+
1728255	涂尊国	8	2	3	3	2	#NULL!	27	2	10	5	481	8.02	#NULL!	2	1	#NULL!	#NULL!	34.9	12.6	41	3.4	31	0.5	13.01	#NULL!	25	2.58	2+	-	-	-	-	+	+
1726191	张天成	6	2	2	2	2	#NULL!	36	2	11	4	553	6.7	#NULL!	2.9	1.12	9.24	#NULL!	33.4	14.1	125	19.4	61	1.38	13.93	#NULL!	94.6	3.03	3+	-	-	-	-	+	+
1722485	周昌伟	9	1	3	3	2	#NULL!	33	2	8	20	251	5.61	110	1.3	0.79	2.129	#NULL!	33.6	13.7	35	7.2	68	#NULL!	13.66	#NULL!	#NULL!	3.81
1713967	娄思杰	6	2	2	2	2	#NULL!	26	2	7	7	417	6.24	1.677	3.08	0.82	1.78	#NULL!	35.9	17	162	2.3	33	0.69	6.74	#NULL!	25	2.631	3+	-	-	-	-	+	+
1708135	杜寒洛	4	1	2	2	1	#NULL!	21	2	7	2	380	7.4	0.962	2.75	1.09	77.36	#NULL!	37.7	14.9	115	5	31	0.86	11.48	#NULL!	25	0.931	2+
1706114	李佳亿	5	1	2	2	1	#NULL!	18.5	2	8	3	549	6.25	0.159	0.97	0.88	0.77	#NULL!	34.9	14.5	100	2.66	24	0.58	9.79	#NULL!	25	2.206	3+	+	-	-	-	-	+
1704374	赵子辰	4	2	2	2	2	#NULL!	20	2	8	1	527	5.46	7.274	2.12	1.18	39.77	#NULL!	43.8	19.3	185	2.99	27	0.92	6.88	#NULL!	#NULL!	1.228	3+	-	-	-	-	+	+
1700910	祝语微	3	1	1	1	2	#NULL!	14	2	10	15	600	7.02	4.665	1.93	0.98	70.19	#NULL!	42.5	19	164	6.33	23	0.71	7	#NULL!	25	#NULL!	3+	-	-	-	+	+	+
1688324	罗宇浩	1	2	1	1	2	#NULL!	9	2	10	2	378	6.56	0.298	1.76	1.34	9.65	#NULL!	35.9	14.6	104	3.3	18	0.8	12.61	#NULL!	25	#NULL!	3+	-	-	-	-	-	+
1685817	涂骏驰	9	2	3	3	2	#NULL!	28	2	9	10	248	4.49	#NULL!	5.41	0.97	1.48	#NULL!	39.3	18.1	156	5.39	39	0.83	7.73	#NULL!	25	5.565	3+	+	-	+	-	+	+
1682520	龚云博	1	1	1	1	2	#NULL!	9	2	10	30	582	11.76	#NULL!	1.47	1	#NULL!	#NULL!	35	12.4	36	3.84	19	0.92	14.76	#NULL!	#NULL!	6.873	3+	+	-	-	-	-	+
1678697	刘昱橙	2	2	1	1	2	#NULL!	15	2	11	15	567	7.92	#NULL!	2.25	1.12	8.28	#NULL!	33	12.3	62	9	39	1.27	11.7	#NULL!	25	1.242	3+	-	-	-	-	+	+
1676718	杨紫涵	9	1	3	3	1	#NULL!	28	2	6	10	408	5.88	#NULL!	2.68	1.16	0.59	#NULL!	37.4	19.5	64	4.5	40	0.76	8.93	#NULL!	25	0.832	3+	-	-	-	-	+	+
1674772	吴俊桐	2	2	1	1	2	#NULL!	15	2	7	#NULL!	619	3.4	#NULL!	1.29	1.08	89.86	#NULL!	37.5	15.1	136	1.95	23	0.72	13.07	#NULL!	#NULL!	1.572	3+	+	-	-	-	-	+
1673067	王华	11	2	3	3	2	#NULL!	35	2	3	10	285	5.65	#NULL!	3.2	1.08	1.2	#NULL!	37.7	15.4	92	11.46	73	1.18	7.43	#NULL!	25	#NULL!	3+	-	-	-	-	+	+
1672997	张应豪	6	2	2	2	1	#NULL!	24	2	15	10	448	4.21	#NULL!	3.45	1.21	14.12	#NULL!	39.4	16.7	131	5.62	49	0.93	9.26	#NULL!	25	9.57	3+	-	-	-	-	+	+
1668617	肖静雅	8	1	3	3	2	#NULL!	25	2	8	4	450	9.04	1.707	1.7	1.17	0.5	#NULL!	38.5	12.8	92	2.39	24	0.66	14.61	#NULL!	25	6.582	3+	-	-	-	-	-	+
1668224	周钰城	4	2	2	2	1	#NULL!	18	2	5	10	389	7.67	#NULL!	5.37	1.02	1.53	#NULL!	44.6	18.4	125	4.83	27	0.67	8.84	#NULL!	25	7.192	2+	+	-	+	-	+	+
1659178	文穆然	4	2	2	2	1	#NULL!	20	2	14	15	474	5	#NULL!	1.96	0.84	42.44	#NULL!	28.5	11.5	54	5.13	29	0.93	9.87	#NULL!	25	3.382	3+	-	-	-	+	+	+
1650028	赵子晗	2	2	1	1	2	#NULL!	15	2	10	7	416	6.22	#NULL!	1.99	1.16	76.31	#NULL!	34.1	14.2	57	3.69	26	0.84	10.11	#NULL!	#NULL!	#NULL!	2+	-	-	-	+	+	+
1646931	刘慧	12	1	3	4	1	#NULL!	43	2	14	15	260	8.43	#NULL!	3.06	1.5	#NULL!	#NULL!	41.5	15.6	216	2.88	48	1.19	9.69	#NULL!	25	#NULL!	3+	-	-	-	-	+	+
1643318	何皓宸	2	2	1	1	1	#NULL!	11	2	9	7	346	5.28	#NULL!	4.84	0.81	#NULL!	#NULL!	42.3	37.3	133	4.8	28	0.92	5.1	#NULL!	25	1.454	3+	+	-	+	-	+	+
1642242	韦艺瑶	3	1	1	1	1	#NULL!	15	2	9	4	361	9.04	#NULL!	2.91	1.3	#NULL!	#NULL!	39	15.3	67	2.9	30	0.91	8.18	#NULL!	25	2.746	3+	-	-	-	-	+	+
1642206	钟超	8	2	3	3	2	#NULL!	22.5	2	8	7	450	2.6	#NULL!	8.16	0.27	#NULL!	#NULL!	48.6	21.5	220	4.44	46	0.98	5.25	#NULL!	#NULL!	2.11	2+	-	-	-	+	+	+
1640059	令狐克凤	12	1	3	4	2	#NULL!	57	2	6	8	268	4.74	#NULL!	4.62	1.05	2.71	#NULL!	41.5	19.1	237	4.24	42	0.73	8.36	#NULL!	25	2.639	3+	+	-	+	-	+	+
1638214	胡敏芝	3	1	1	1	1	#NULL!	26	2	6	7	417	5.43	#NULL!	3.79	0.76	#NULL!	#NULL!	39	17.7	71	3.64	24	0.73	6.16	#NULL!	#NULL!	2.432	3+	-	-	-	+	+	+
1635257	蒋垒	13	2	4	4	1	#NULL!	39	2	9	10	402	5.26	#NULL!	4.39	1.21	#NULL!	#NULL!	45.1	19.3	163	3.39	53	0.97	10.05	#NULL!	25	3.18	3+	+	-	+	-	+	+
1631854	任宇晨	7	2	2	2	2	#NULL!	21.5	2	15	2	497	5.88	#NULL!	4.35	1.19	52.1	#NULL!	38.6	7.8	72	5.89	39	1.01	7.91	#NULL!	57.2	5.707	3+	-	-	+	-	+	+
1628895	尤登优	14	1	4	4	2	#NULL!	34	2	12	5	472	7.31	#NULL!	4.15	1.24	15.23	#NULL!	41.6	17.3	105	5.85	72	0.69	9.96	#NULL!	25	8.333	3+	-	-	+	-	+	+
1623920	杨孝一	2	1	1	1	1	#NULL!	12.5	2	11	7	413	5.88	#NULL!	3.17	1.25	#NULL!	#NULL!	39.9	16.6	131	4.36	25	0.93	12.3	#NULL!	25	10.292	3+	-	-	-	-	+	+
1616924	牟瑾玥	4	1	2	2	2	#NULL!	19	2	13	4	584	10.39	#NULL!	1.64	1.15	2.21	#NULL!	35.3	11.7	62	6.44	28	0.61	11.94	#NULL!	25	1.867	3+	-	-	-	-	-	+
1615311	赵富国	13	2	4	4	2	#NULL!	49	2	15	10	425	9.04	#NULL!	3.52	1.05	1.18	#NULL!	36.1	12.3	68	7.51	63	1.33	11.27	#NULL!	25	7.577	3+	-	-	+	-	+	+
1614928	罗梅	10	1	3	3	2	#NULL!	31	2	22	1	253	3.69	#NULL!	2.69	0.66	3.04	#NULL!	33.3	7.8	76	11.55	163	1.64	4.43	#NULL!	25	4.675	3+	-	-	-	+	+	+
1612783	吴钰轩	3	2	1	1	2	#NULL!	16	2	8	7	425	7.64	#NULL!	3.06	1.25	8.39	#NULL!	41	18.2	155	2.97	29	0.86	9.57	#NULL!	25	3.766	3+	-	-	-	-	+	+
1610146	张喻恒	6	2	2	2	2	#NULL!	22	2	8	7	377	5.56	#NULL!	3.51	1.15	2.49	#NULL!	40.1	17.9	119	1.93	33	0.57	9.88	#NULL!	25	0.759	3+	-	-	+	-	+	+
1605716	王子诗琦	4	2	2	2	2	#NULL!	18.5	2	22	4	385	7.92	#NULL!	1.3	1.16	98.36	#NULL!	36.8	14.5	72	11.28	109	1.7	10.57	#NULL!	25	2.836	3+	+	-	-	-	-	+
1590250	刘孝鹏	7	2	2	2	2	#NULL!	25	2	11	10	305	4.11	#NULL!	2.98	0.74	0.28	12.708	35.9	14.1	156	6.21	63	1.31	9.28	#NULL!	25	3.196	3+	-	-	-	+	+	+
1590000	韩奧瀚	2	2	1	1	2	#NULL!	13.5	2	16	5	593	9.04	#NULL!	0.91	1.69	#NULL!	#NULL!	41.2	13	46	11.92	49	1.42	12.93	#NULL!	25	4.44	2+	+	-	-	+	-	+
1587796	赵佳扬	3	2	1	1	2	#NULL!	16	2	19	7	475	7.44	#NULL!	1.24	1.03	2.31	#NULL!	36.3	9.3	135	9.21	62	1.48	9.51	#NULL!	#NULL!	3.082	3+	+	-	-	-	-	+
1586889	喻忠鹏	5	2	2	2	2	#NULL!	17	2	13	30	403	5.28	#NULL!	0.82	1.07	0.54	#NULL!	33.5	8.3	142	4.8	19	0.92	17.53	#NULL!	25	3.491	3+	+	-	-	-	-	+
1586128	田莹莹	10	1	3	3	2	#NULL!	55	2	6	10	399	7.44	#NULL!	1.09	1.16	0.5	#NULL!	38.9	14.4	142	4.53	35	0.69	17.09	#NULL!	#NULL!	5.629	3+	+	-	-	-	-	+
1585282	余方海	2	2	1	1	2	#NULL!	14	2	10	3	379	6.22	#NULL!	2.45	1.14	75.46	#NULL!	34.4	14	122	5.69	32	0.98	11.18	#NULL!	26.4	2.187	3+	-	-	-	-	+	+
1580153	黄宇轩	1	2	1	1	2	#NULL!	13	2	9	15	325	6.22	#NULL!	0.93	1.07	62.27	#NULL!	40	15.1	118	7.29	42	1.72	10.64	#NULL!	#NULL!	5.512	3+	+	-	-	-	-	+
1576494	李皓博	2	2	1	1	1	#NULL!	17	2	10	7	306	5.28	#NULL!	1.16	0.71	9.35	12.632	30.8	14.5	82	2.82	23	0.63	9.78	#NULL!	#NULL!	6.011	3+	+	-	-	+	-	+
1564563	杨浩缘	2	2	1	1	2	#NULL!	14	2	12	4	368	6.59	#NULL!	2.63	1.35	70.15	#NULL!	34.9	13.9	180	4.19	20	0.72	9.03	#NULL!	#NULL!	0.912	3+	-	-	-	-	+	+
1563302	龙海悦	3	2	1	1	1	#NULL!	21.5	2	15	7	481	13.39	#NULL!	2.3	1.58	11.64	#NULL!	39.3	14.8	87	18.2	67	1.31	12.43	#NULL!	25	1.384	3+	-	-	-	-	+	+
1562871	田婧玲	9	1	3	3	2	#NULL!	26	2	16	7	417	8.73	#NULL!	2.14	1.19	1000	#NULL!	35.9	8.1	97	4.94	35	0.94	12.99	#NULL!	25	24.563	3+	-	-	-	-	+	+
1556558	黄梓欣	13	1	4	4	1	#NULL!	61	2	10	30	283	4.63	#NULL!	6.28	1.06	6.02	#NULL!	57	29.1	288	7.91	84	1.24	6.74	#NULL!	161	5.627	3+	+	-	+	-	+	+
1554345	郭群佳	7	2	2	2	2	#NULL!	28	2	7	3	367	5.57	#NULL!	3.61	1.17	18.24	#NULL!	37.9	12.8	110	4.11	41	0.78	11.93	#NULL!	45.4	3.505	3+	-	-	+	-	+	+
1548934	欧情	8	1	3	3	2	#NULL!	24	2	6	30	386	7	#NULL!	3.22	1.18	2.49	#NULL!	44.9	19	182	2.46	38	0.63	9.12	#NULL!	25	0.204	3+	-	-	-	-	+	+
1541540	宋信宸	2	1	1	1	1	#NULL!	10	2	12	10	365	7.44	#NULL!	4.08	1.34	27.21	#NULL!	42.3	15.2	105	5.71	27	1.17	9.49	#NULL!	25	0.795	3+	-	-	+	-	+	+
1529807	贺俊杰	8	1	3	3	1	#NULL!	22	2	21	2	307	3.8	#NULL!	8.69	0.68	2.87	#NULL!	55.33	24.9	126	8.14	88	1.15	3.39	#NULL!	26.3	2.219	2+	-	-	-	+	+	+
1529320	鲁仲辕	3	1	1	1	1	#NULL!	15	2	16	7	465	322	#NULL!	1.3	0.88	12.27	#NULL!	45.8	8.9	99	2.55	27	0.72	16.04	#NULL!	#NULL!	0.971	3+	+	+	-	-	-	+
1524614	李佳鄅	5	1	2	2	1	#NULL!	24	2	7	4	353	6.93	#NULL!	3.11	1.16	8.85	#NULL!	42.5	15	168	3.24	27	0.8	9.82	#NULL!	25	2.172	3+	-	-	-	-	+	+
1513526	胡文艺	8	1	3	3	2	#NULL!	26	2	10	7	315	6.93	#NULL!	4.29	1.16	2.53	#NULL!	43	17.9	109	4.28	39	0.65	8.17	#NULL!	25	4.111	3+	-	-	+	-	+	+
1510691	肖宏峰	4	1	2	2	2	#NULL!	15	2	14	7	233	7.65	#NULL!	3.76	1.28	40.02	#NULL!	45.3	19.2	83	11.82	59	1.84	9.72	#NULL!	#NULL!	1.442	3+	-	-	+	-	+	+
1510432	杨俊辉	10	1	3	3	2	#NULL!	30	2	6	1	354	4.7	#NULL!	4.75	1	0.73	#NULL!	46.3	23.1	176	3.12	42	0.63	7.73	#NULL!	34.1	2.834	3+	+	-	+	-	+	+
1508408	张天进	8	1	3	3	2	#NULL!	26	2	10	3	517	6.67	#NULL!	3.01	0.9	9.24	#NULL!	38.4	13.1	148	6.67	45	0.82	9.6	#NULL!	25	9.432	3+	-	-	-	-	+	+
1504788	李诺昌	6	1	2	2	2	#NULL!	20	2	4	7	195	3.06	#NULL!	2.64	0.75	#NULL!	#NULL!	51.1	11.3	26	3.96	34	0.58	9.78	#NULL!	#NULL!	6.375	3+	-	-	-	+	+	+
1504512	孙婷婷	10	2	3	3	2	#NULL!	25	2	13	4	535	6.93	#NULL!	4.7	1.13	11.61	#NULL!	32.7	13.5	39	4.41	43	0.65	1.97	#NULL!	54.1	2.472	3+	+	-	+	-	+	+
1502551	余广豪	8	1	3	3	2	#NULL!	25	2	10	4	233	1.6	#NULL!	4.49	0.76	36.93	#NULL!	39.8	14.7	222	5.29	50	1.22	6.96	#NULL!	70.2	1.448	3+	+	-	-	+	+	+
1500335	韩励勤	10	2	3	3	2	#NULL!	46	2	9	20	272	3.42	#NULL!	4.53	0.89	8.37	#NULL!	45.1	23.4	23.4	3.51	38	0.91	9.41	#NULL!	39.3	0.678	2+	+	-	+	-	+	+
1497531	何栩彤	5	2	2	2	2	#NULL!	22	2	7	7	295	7.28	#NULL!	1.68	1.29	2.97	#NULL!	35.7	14.3	100	5.23	30	0.7	13.02	#NULL!	25	0.888	3+	-	-	-	-	-	+
1497203	袁玉航	13	2	4	4	2	#NULL!	47	2	5	30	255	4.36	#NULL!	2.5	0.74	3.06	#NULL!	38.4	21.7	178	3.99	61	1.12	7.53	#NULL!	25	7.1	3+	-	-	-	+	+	+
1492369	余永鑫	5	1	2	2	2	#NULL!	17	2	8	30	306	5.63	#NULL!	1.5	0.89	2.51	#NULL!	32	10.4	156	2.95	20	0.89	17.02	#NULL!	25	1.952	2+	-	-	-	-	-	+
1489952	余思妍	3	2	1	1	2	#NULL!	15	2	9	6	314	3.82	#NULL!	1.37	0.86	33.4	#NULL!	63	10	353	3.16	35	0.8	11.57	#NULL!	25	2.317	3+	+	-	-	-	-	+
1485282	朱丽佳	13	2	4	4	1	#NULL!	62	2	7	20	263	5.15	#NULL!	8.42	0.96	0.86	#NULL!	52.2	24.7	247	2.01	39	0.56	7.17	#NULL!	654	2.794	3+	-	-	+	-	+	+
1475464	罗源泉	10	1	3	3	2	#NULL!	28	2	9	7	354	4.56	#NULL!	4.34	0.96	#NULL!	#NULL!	47.5	20.5	252	4.44	56	0.84	9.48	#NULL!	43.5	0.951	2+	-	-	+	-	+	+
1471671	钟玥希	2	2	1	1	1	#NULL!	10	2	23	1	471	3.24	#NULL!	1.64	0.08	16.62	#NULL!	37.5	11.6	62	11.62	45	1.21	9.66	#NULL!	#NULL!	6.999	3+	-	-	-	+	-	+
1471014	袁冰冰	8	1	3	3	2	#NULL!	28	2	8	7	425	3.74	#NULL!	2.65	0.83	12.49	#NULL!	38	15.6	110	4.05	49	0.71	10.74	#NULL!	25	1.979	3+	-	-	-	-	+	+
1468666	柳方杰	5	1	2	2	2	#NULL!	17	2	8	2	277	8.1	#NULL!	1.1	0.72	0.11	#NULL!	51.3	21.9	158	2.2	22	0.6	7.5	#NULL!	25	1.122	3+	+	+	-	-	-	+
1457187	龙佳瑶	4	2	2	2	2	#NULL!	31	2	12	8	411	10.2	#NULL!	1.87	1.46	2.46	#NULL!	35.9	11.1	43	2.35	33	0.88	10.32	#NULL!	25	7.52	3+	-	-	-	-	+	+
1451586	任成林	6	1	2	2	2	#NULL!	19	2	15	20	425	5.5	#NULL!	1.25	1.1	0.01	#NULL!	35.2	11.8	54	2.56	36	0.74	12.45	#NULL!	25	3.285	2+	+	+	-	-	-	+
1450338	彭嘉俊	4	1	2	2	2	#NULL!	14	2	18	15	510	6.18	#NULL!	1.5	0.99	2.17	7.994	34.4	12.1	64	7.52	34	0.84	10.94	#NULL!	25	2.77	3+	-	+	-	-	-	+
1449762	刘梓鑫	4	1	2	2	2	#NULL!	30	2	9	5	397	3.76	1.856	2.02	1.39	10.76	#NULL!	34.8	13.9	87	2.9	34	0.89	9.41	#NULL!	25	3.697	3+	-	-	-	-	+	+
1444098	杨心源	7	1	2	2	1	#NULL!	25	2	11	3	361	5.38	#NULL!	5.95	1.43	6.5	#NULL!	39.4	17.9	77	8.87	47	1.13	10.15	#NULL!	25	4.543	3+	+	-	+	-	+	+
1443946	刘烨灵	6	1	2	2	1	#NULL!	20.5	2	15	3	478	3.92	#NULL!	12	0.68	497.13	#NULL!	45.1	11.5	57	12.86	58	0.91	8.55	#NULL!	#NULL!	9.336	3+	-	-	+	-	+	+
1423648	王鹤杰	11	1	3	3	1	#NULL!	43	2	10	30	412	5.85	#NULL!	2.59	0.9	0.49	#NULL!	40.4	14	180	3.29	43	0.87	13.68	#NULL!	25	5.536	3+	-	-	-	-	+	+
1421685	龙博宇	3	1	1	1	2	#NULL!	17.5	2	8	30	549	#NULL!	#NULL!	1.96	1.42	0.001	#NULL!	34.5	11.3	29	2.88	21	0.77	12.38	#NULL!	25	1.788	2+	-	-	-	+	+	+
1420568	张博瀚	4	1	2	2	1	#NULL!	20	2	12	7	359	7.33	#NULL!	2.73	1.1	3.57	#NULL!	39.1	15.3	#NULL!	13.04	67	1.37	9.72	#NULL!	#NULL!	2.396	3+	-	-	-	-	+	+
1419749	李志轩	2	1	1	1	2	#NULL!	11	2	16	30	541	5.51	#NULL!	3.68	1.09	3.3	#NULL!	57.5	12.4	188	3.16	40	1.43	8.46	#NULL!	#NULL!	2.358	2+	-	-	+	-	+	+
1418100	罗小雨	12	2	3	4	2	#NULL!	37	2	6	30	272	1.69	#NULL!	2.56	0.76	0.08	#NULL!	35	17.78	176	2.95	63	1.39	9.58	#NULL!	25	1.795	3+	-	-	-	-	+	+
1410375	郑传有	11	1	3	3	1	#NULL!	37	2	15	5	672	6.48	#NULL!	4.54	1.38	0.23	#NULL!	37.2	11.7	69	3.46	46	0.67	11.4	#NULL!	102	6.665	2+	+	-	+	-	+	+
1407167	罗子文	6	1	2	2	1	#NULL!	25	2	12	2	518	#NULL!	#NULL!	2.13	1.37	1.98	#NULL!	35.6	12	19	2.91	39	0.82	7.07	#NULL!	25	30.912	3+	-	-	-	-	+	+
1404201	梁俊豪	9	2	3	3	2	#NULL!	15	2	19	3	284	2.94	#NULL!	2.28	0.71	0.85	0.825	37.1	16.3	122	7.23	24	0.73	9.11	#NULL!	0.1	4.299	3+	-	-	-	+	+	+
1403572	蒋韩龙	5	1	2	2	2	#NULL!	20	2	13	3	485	#NULL!	#NULL!	3.59	#NULL!	0.41	#NULL!	55.1	26.8	330	11.26	51	1.22	8.47	#NULL!	#NULL!	4.445	3+	-	-	+	-	+	+
1397350	李诺昌	5	1	2	2	2	#NULL!	20	2	9	15	379	#NULL!	#NULL!	2.64	0.75	13.01	#NULL!	42.2	11.3	297	#NULL!	#NULL!	#NULL!	9.78	#NULL!	#NULL!	6.375	3+	-	-	-	-	+	+
1395459	罗光豪	3	1	1	1	2	#NULL!	19.5	2	10	10	611	#NULL!	#NULL!	1.32	#NULL!	14.47	#NULL!	41.2	14.6	240	2.65	39	0.76	13.72	#NULL!	#NULL!	5.633	3+	+	+	-	-	-	+
1390819	田诗渝	9	2	3	3	1	#NULL!	38	2	4	2	448	8.39	#NULL!	6.55	1.52	1000	#NULL!	36.8	12.2	#NULL!	3.75	48	0.72	9.67	#NULL!	25	2.477	3+	-	-	+	-	+	+
1389494	杨建军	12	1	3	4	2	#NULL!	52	2	19	7	129	#NULL!	#NULL!	4.18	0.65	0.5	#NULL!	38.9	18.8	295	28.02	371	5.45	3.83	#NULL!	136	#NULL!	2+	-	-	+	-	+	+
1381452	张洪睿	3	1	1	1	2	#NULL!	17	2	6	6	361	#NULL!	#NULL!	1.75	0.8	12.12	#NULL!	35.7	12.1	15	3.18	53	0.69	7.66	#NULL!	25	#NULL!	3+	-	-	-	-	-	+
1381361	刘城成	4	1	2	2	2	#NULL!	20	2	11	7	567	#NULL!	#NULL!	2.11	1.41	15.78	#NULL!	35.6	12	96	2.67	24	0.73	12.19	#NULL!	25	3.381	2+	-	-	-	-	+	+
1380980	王雨泽	7	1	2	2	2	#NULL!	37	2	8	7	287	#NULL!	#NULL!	2.8	1.09	0.17	#NULL!	42.1	18.4	133	3.97	43	0.71	9.95	#NULL!	25	4.069	3+	-	-	-	-	+	+
1370913	黎俊楠	2	1	1	1	2	#NULL!	12.5	2	12	2	191	#NULL!	#NULL!	5.44	1.03	59.45	#NULL!	37	13.6	53	2.68	26	0.89	7.2	#NULL!	25	3.902	3+	+	-	+	-	+	+
1370208	杨珺泽	3	1	1	1	2	#NULL!	17	2	11	7	296	4.78	#NULL!	1.38	0.78	30.43	#NULL!	36.3	19.6	88	3.3	27	0.86	8.7	#NULL!	25	1.392	3+	+	+	-	-	-	+
1368245	骆厅	9	1	3	3	2	#NULL!	23	2	10	10	480	#NULL!	#NULL!	3.72	0.86	0.48	#NULL!	52.5	27.2	242	5.93	51	0.93	8.62	#NULL!	25	4.018	3+	-	-	+	-	+	+
1365168	姚瑞杰	10	1	3	3	2	#NULL!	33	2	9	1	323	#NULL!	#NULL!	9.68	0.99	#NULL!	#NULL!	55.7	28	197	3.08	53	0.91	9.82	#NULL!	#NULL!	10.784	3+	-	-	+	-	+	+
1365024	王姣	14	2	4	4	1	#NULL!	57	2	6	37	317	4.27	#NULL!	2.27	#NULL!	7.96	#NULL!	#NULL!	29.6	#NULL!	#NULL!	#NULL!	#NULL!	6.47	#NULL!	25	2.036	3+	-	-	-	-	+	+
1360395	李欣怡	1	1	1	1	2	#NULL!	10	2	6	30	551	7.68	#NULL!	0.88	0.9	141.31	#NULL!	35.5	11.3	39	1.39	17	0.69	14.86	#NULL!	#NULL!	1.148	3+	+	+	-	-	-	+
1359524	黄灏雨	3	1	1	1	2	#NULL!	16.5	2	9	1	392	5.8	#NULL!	2.15	1	7.89	#NULL!	39.5	14.7	121	2.73	24	0.67	9.04	#NULL!	25	1.44	3+	-	-	-	-	+	+
1356735	庄逸辰	5	1	2	2	1	#NULL!	20	2	10	7	706	#NULL!	#NULL!	4.64	#NULL!	49.11	#NULL!	47.1	20.3	316	3.65	41	0.77	8.14	#NULL!	25	2.865	3+	+	-	+	-	+	+
1355267	张贵涛	14	1	4	4	1	#NULL!	43	2	5	7	395	#NULL!	#NULL!	6.25	#NULL!	0.246	#NULL!	41.2	17.5	241	6.15	59	0.99	13.09	#NULL!	#NULL!	3.956	3+	+	-	+	-	+	+
1354227	李雨嘉	5	2	2	2	2	#NULL!	22	2	10	5	379	5.62	#NULL!	1.75	1.1	0.024	#NULL!	35	13	85	4.51	38	0.76	15.04	#NULL!	25	2.069	3+	-	-	-	-	-	+
1347410	莫文菲	5	2	2	2	2	#NULL!	14	2	10	3	213	4.98	#NULL!	1.36	0.84	7.714	#NULL!	24.5	12.8	35	2.88	24	0.51	8.25	#NULL!	25	0.92	3+	+	+	-	-	-	+
1343852	盛优璇	2	2	1	1	2	#NULL!	11	2	9	7	485	7.3	#NULL!	2.02	1.32	0.983	#NULL!	36.8	12.4	27	6.92	32	0.64	13.78	#NULL!	25	#NULL!	3+	-	-	-	-	+	+
1339094	米兴华	5	1	2	2	2	#NULL!	22	2	10	7	436	#NULL!	#NULL!	3.34	0.93	0.823	#NULL!	45.3	12.7	263	5.49	42	1.26	10.6	#NULL!	94.7	2.347	3+	-	-	-	-	+	+
1337870	杨睿颖	2	2	1	1	2	#NULL!	10	2	17	5	397	3.99	#NULL!	2.68	0.91	2.484	#NULL!	39.7	13.7	81	2.59	17	0.75	15.16	#NULL!	25	0.919	3+	-	-	-	-	+	+
1327681	欧怡晨	2	1	1	1	2	#NULL!	11.5	2	12	7	376	#NULL!	#NULL!	0.85	0.82	34.022	#NULL!	36.6	14	52	3.73	23	0.86	14.41	#NULL!	25	2.924	3+	+	+	-	-	-	+
1327502	李宇航	9	1	3	3	1	#NULL!	28	2	5	6	345	#NULL!	#NULL!	4.35	0.71	2.498	#NULL!	47.2	21.7	200	9.28	58	1.62	8.13	#NULL!	#NULL!	1.917	3+	-	-	+	-	+	+
1320969	梁茂林	11	1	3	3	2	#NULL!	28	2	6	2	298	#NULL!	#NULL!	4.01	1.19	0.001	#NULL!	42.4	17.4	118	2.95	44	0.94	7.1	#NULL!	25	5.777	3+	-	-	+	-	+	+
1317751	吴优	1	2	1	1	2	#NULL!	10	2	25	20	773	4.71	#NULL!	10.4	0.56	17.379	#NULL!	33.1	15	180	7.85	19	2.06	12.96	#NULL!	#NULL!	2.439	3+	+	+	-	-	-	+
1311183	刘纾萌	2	2	1	1	1	#NULL!	11	2	8	7	503	#NULL!	#NULL!	3.57	#NULL!	#NULL!	#NULL!	48.9	17.8	182	5.74	25	0.87	13.06	#NULL!	#NULL!	2.875	2+	-	-	+	-	+	+
1304557	徐冰冰	13	2	4	4	2	#NULL!	38	2	7	14	522	#NULL!	#NULL!	4.89	#NULL!	147.601	#NULL!	48.2	26.4	477	13.12	131	1.98	7.1	#NULL!	#NULL!	4.382	3+	+	-	+	-	+	+
1302554	洪金	13	1	4	4	2	#NULL!	40	2	16	15	330	6.3	#NULL!	1.73	0.89	0.206	#NULL!	45.7	13.9	424	6.2	56	0.89	12.36	#NULL!	36	4.712	3+	-	+	-	-	-	+
1299590	袁宗敏	4	1	2	2	1	#NULL!	17	2	10	7	326	6.5	#NULL!	1.52	1.37	2.06	#NULL!	40	12.51	78	7.71	53	1.77	13.84	#NULL!	25	2.781	3+	-	+	-	-	-	+
1299244	秦芷涵	3	2	1	1	2	#NULL!	15	2	13	30	367	#NULL!	#NULL!	3.01	0.71	0.001	#NULL!	28.2	8.9	87	5.42	26	1.08	14.49	#NULL!	25	#NULL!	3+	-	-	-	-	+	+
1293947	何伟诚	1	1	1	1	1	#NULL!	13	2	13	7	553	#NULL!	#NULL!	1.73	1.73	#NULL!	#NULL!	34.6	13.2	66	#NULL!	#NULL!	#NULL!	10.36	#NULL!	25	7.946	3+	-	+	-	-	-	+
1292740	杨立新	2	1	1	1	2	#NULL!	13.5	2	17	6	463	#NULL!	#NULL!	1.43	1.04	11.961	#NULL!	33.4	11	21	5.93	35	1.01	14.67	#NULL!	25	#NULL!	3+	+	+	-	-	-	+
1291609	唐澧铖	3	1	1	1	2	#NULL!	15	2	14	2	393	#NULL!	#NULL!	2.31	0.71	21.535	#NULL!	47.7	12	438	2.72	50	1.72	5.19	#NULL!	#NULL!	1.771	3+	-	+	-	-	+	+
1291603	赵俊	6	1	2	2	1	#NULL!	7	2	12	15	348	#NULL!	#NULL!	1.61	0.97	6.145	#NULL!	34.8	20.3	28	4.4	31	0.8	14.2	#NULL!	#NULL!	5.266	3+	-	+	-	-	-	+
1290332	尹华岚	5	2	2	2	2	#NULL!	21	2	11	7	440	#NULL!	#NULL!	2.45	1.04	366.826	#NULL!	38.1	13.8	68	4.15	46	0.99	14.44	#NULL!	25	6.455	3+	-	+	-	-	+	+
1289764	吴文杰	4	1	2	2	2	#NULL!	18	2	14	6	344	#NULL!	#NULL!	1.94	#NULL!	17.668	#NULL!	37.5	25.1	487	3.52	39	1.12	6.94	#NULL!	#NULL!	1.871	3+	-	-	-	+	+	+
1288650	黄耀	8	1	3	3	2	#NULL!	24	2	11	7	361	#NULL!	#NULL!	2.03	0.7	0.497	#NULL!	45.2	20.1	125	4.38	31	0.78	11.1	#NULL!	25	2.592	3+	-	-	-	-	+	+
1285971	谢国全	13	1	4	4	2	#NULL!	44	2	10	8	276	#NULL!	#NULL!	4.46	0.76	2.417	#NULL!	35.3	13.9	199	5.54	50	1	7.2	#NULL!	#NULL!	3.525	3+	+	-	+	-	+	+
1285198	杨子豪	8	1	3	3	2	#NULL!	28	2	6	4	455	#NULL!	#NULL!	8.62	0.88	4.303	#NULL!	#NULL!	13.5	#NULL!	#NULL!	#NULL!	#NULL!	9	#NULL!	25	6.778	3+	-	-	+	-	+	+
1283423	张玄馨	2	2	1	1	1	#NULL!	14	2	10	8	388	#NULL!	#NULL!	1.87	0.83	40.131	#NULL!	32.9	15.8	68	3.39	26	0.93	10.95	#NULL!	#NULL!	0.303	2+	-	-	-	-	+	+
1282688	李航宇	10	1	3	3	2	#NULL!	14	2	9	7	388	#NULL!	#NULL!	3.75	0.98	40.131	#NULL!	32.9	20.7	68	4.53	32	0.87	8.07	#NULL!	25	2.401	2+	-	-	+	-	+	+
1281739	赵永丹	13	2	4	4	2	#NULL!	45	2	11	7	258	#NULL!	#NULL!	2.54	1.39	1.834	#NULL!	35.9	13.9	13.9	5.5	53	1.12	11.26	#NULL!	25	3.405	3+	-	+	-	-	+	+
1280959	覃石先	9	2	3	3	2	#NULL!	33	2	11	4	201	#NULL!	#NULL!	16.6	0.06	0.001	#NULL!	#NULL!	24.8	#NULL!	12.38	104	1.89	3.54	#NULL!	624	#NULL!	2+	-	+	-	-	+	+
1278468	李家怡	11	2	3	3	2	#NULL!	31	2	11	11	440	#NULL!	#NULL!	2.35	1.62	#NULL!	#NULL!	42.3	14.6	129	2.76	41	0.78	11.41	#NULL!	25	1.387	2+	-	+	-	-	+	+
1267577	李娅	14	2	4	4	2	#NULL!	40	2	6	21	115	#NULL!	#NULL!	4.35	0.71	3.518	#NULL!	34.5	24.4	124	4.85	63	1.1	13.44	#NULL!	25	7.26	2+	-	-	+	-	+	+
1267356	乐文熙	5	2	2	2	1	#NULL!	23	2	5	7	490	#NULL!	#NULL!	2.51	1.08	1.056	#NULL!	45.7	12.8	146	3.29	28	0.92	13.61	#NULL!	25	1.544	2+	-	+	-	-	+	+
1260556	周项江	12	1	3	4	2	#NULL!	29	2	28	3	316	#NULL!	#NULL!	2.15	0.78	0.058	#NULL!	31.3	13	104	4.51	56	0.92	9.03	#NULL!	#NULL!	0.098	3+	-	-	-	-	+	+
1259317	吴飞燕	13	2	4	4	2	#NULL!	52	2	19	6	278	#NULL!	#NULL!	6.56	1.76	0.01	#NULL!	55.7	23.2	338	4.17	49	0.96	7.19	#NULL!	#NULL!	1.672	2+	-	-	+	-	+	+
1253389	李佳存	6	1	2	2	2	#NULL!	28	2	7	4	193	#NULL!	#NULL!	2.87	0.9	1.436	#NULL!	36.4	17.1	147	6.44	32	0.77	7.08	#NULL!	25	1.87	2+	-	-	-	-	+	+
1252318	邱文益	5	1	2	2	2	#NULL!	16.5	2	10	5	501	#NULL!	#NULL!	2.54	1.37	0.1	#NULL!	38.9	13.3	49	2.48	24	0.95	12.4	#NULL!	25	1.627	3+	-	+	-	-	+	+
1251784	张倩倩	7	2	2	2	2	#NULL!	20	2	10	20	330	1.6	#NULL!	6.82	0.05	5.959	0.32	#NULL!	34.9	#NULL!	12.03	48	1.6	6.05	#NULL!	359	0.926	2+	+	+	+	-	+	+
1249203	娄俊杰	5	1	2	2	1	#NULL!	16	2	7	60	275	#NULL!	#NULL!	4.32	1.04	0.697	#NULL!	45.9	23.9	182	4.2	26	0.89	5.91	#NULL!	#NULL!	1.159	3+	-	-	+	-	+	+
1243171	杨兴汇晗	2	1	1	1	2	#NULL!	13.5	2	10	10	431	#NULL!	#NULL!	1.72	1.2	2.902	#NULL!	36.6	10.7	27	4.59	20	0.87	11.89	#NULL!	25	1.57	3+	-	+	-	-	-	+
1237418	张龙龙	11	1	3	3	2	#NULL!	36.5	2	10	2	334	3.76	#NULL!	2.99	#NULL!	0.01	#NULL!	44.8	21.5	258	3.41	49	1.28	10.54	#NULL!	#NULL!	3.368	2+	-	-	-	-	+	+
1234971	朱政易	3	1	1	1	2	#NULL!	19.5	2	10	32	183	#NULL!	#NULL!	2.54	1.18	18.81	#NULL!	37.4	14.5	132	2.49	28	0.85	8.27	#NULL!	25	1.036	3+	-	+	-	-	+	+
1234509	穆瑾萱	2	2	1	1	1	#NULL!	13	2	14	3	337	#NULL!	#NULL!	0.92	1.12	2.688	#NULL!	49.6	11.6	248	7.08	24	0.98	16.84	#NULL!	#NULL!	0.746	3+	+	+	-	-	-	+
1226650	王峻熙	2	1	1	1	1	#NULL!	13	2	10	7	344	#NULL!	#NULL!	3.08	1.69	0.933	#NULL!	37.2	13.5	64	3.47	41	1.15	8.12	#NULL!	#NULL!	5.089	±	-	-	-	-	+	+
1213681	王承滏	5	1	2	2	1	#NULL!	20	2	8	7	318	7.7	#NULL!	1.84	1.4	0.846	#NULL!	35.7	11.9	23	2.36	28	1.02	8.66	#NULL!	#NULL!	1.293	3+	-	-	-	-	+	+
1212237	王慧雨	4	2	2	2	2	#NULL!	17.5	2	11	3	250	8.8	#NULL!	1.42	1	55.219	#NULL!	27.9	7.1	11	4.66	34	1.03	10.22	#NULL!	25	4.136	3+	-	-	+	-	+	+
1204214	张淋城	5	1	2	2	2	#NULL!	18	2	6	20	328	5.73	#NULL!	2	1.11	2.28	#NULL!	41.1	16.8	156	3.65	23	0.71	13.09	#NULL!	#NULL!	3.408	2+	-	-	-	-	+	+
1204094	谢良杰	7	1	2	2	2	#NULL!	25	2	14	8	351	7.46	#NULL!	1.63	0.88	0.72	#NULL!	29.1	12.1	119	4.78	63	0.97	9.18	#NULL!	25	3.877	3+	-	+	-	-	-	+
1203649	周煜浩	12	1	2	4	1	#NULL!	20	2	11	10	331	7.75	#NULL!	3.4	1.19	21.85	#NULL!	34.8	11.06	61	3.98	26	0.8	11.47	#NULL!	#NULL!	3.104	3+	-	-	-	-	+	+
1203176	周梓睿	4	2	2	2	2	#NULL!	25	2	8	6	261	9.04	#NULL!	4.97	1.16	8.68	#NULL!	39.5	15.2	58	3.7	44	0.85	7.77	#NULL!	62.9	2.22	3+	+	-	+	-	+	+
1200682	张广胜	9	1	3	3	2	#NULL!	26	2	14	7	536	6.93	#NULL!	2.29	1.1	0.38	#NULL!	31.4	11.3	92	10.43	54	0.98	8.58	#NULL!	#NULL!	3.508	3+	-	+	-	-	+	+
1197836	熊定飞	14	1	4	4	2	#NULL!	45	2	11	30	400	2.89	#NULL!	5.26	#NULL!	0.05	#NULL!	33.3	14.6	200	9.09	83	1.51	8.5	#NULL!	#NULL!	7.798	3+	+	-	+	-	+	+
1195751	饶文杰	8	1	3	3	2	#NULL!	22	2	8	5	381	6.42	#NULL!	1.72	1.22	6.76	#NULL!	35.7	12.8	83	3.89	60	0.94	13.74	#NULL!	25	3.623	3+	-	+	-	-	-	+
1194486	王亮亮	4	1	2	2	1	#NULL!	14	2	12	5	702	2.83	#NULL!	8.36	1.32	0.18	#NULL!	27	10.8	26	5	25	1.01	15.95	#NULL!	#NULL!	8.336	3+	-	-	+	-	+	+
1192827	莫镇东	6	1	2	2	2	#NULL!	26	2	23	8	313	6.96	#NULL!	3.25	0.88	327.65	#NULL!	28.8	11.8	82	2.78	40	0.91	6.54	#NULL!	25	6.043	3+	-	-	-	-	+	+
1188041	殷豪杰	7	1	2	2	2	#NULL!	26	2	14	22	422	8.21	#NULL!	1.5	1.16	#NULL!	#NULL!	35.6	11.5	46	3.67	30	1.1	13.5	#NULL!	31.8	4.642	3+	-	+	-	-	-	+
1179228	吴昌建	12	1	3	4	2	#NULL!	37	2	11	3	388	3.71	#NULL!	9.24	0.08	0.54	#NULL!	38.8	14.2	147	10.68	61	1.11	5.45	#NULL!	380	6.671	3+	-	-	+	-	+	+
1178315	杨静诺言	7	1	2	2	2	#NULL!	36	2	19	4	342	#NULL!	#NULL!	1.83	0.71	1.15	#NULL!	36.7	14	152	4.73	36	0.82	10.51	#NULL!	25	3.231	3+	-	-	-	-	-	+
1177591	熊丽萍	7	2	2	2	2	#NULL!	30	2	2	67	422	#NULL!	#NULL!	1.99	0.75	#NULL!	#NULL!	34.5	10.2	71	2.77	38	0.68	10.47	#NULL!	25	#NULL!	3+	-	-	-	-	+	+
1170968	赵佳熠	4	2	2	2	1	#NULL!	18	2	8	7	391	#NULL!	#NULL!	1.59	0.84	0.14	#NULL!	32.8	13.1	101	4.39	26	0.7	10.62	#NULL!	25	0.704	2+	-	+	-	-	-	+
1170087	罗碇涵	4	1	2	2	1	#NULL!	17	2	11	4	293	4.36	#NULL!	3.97	1.04	1.02	#NULL!	34.7	12.9	74	4.56	47	0.86	8.23	#NULL!	25	3.061	3+	-	-	+	-	+	+
1169215	龙炼	11	1	3	3	2	#NULL!	42	2	11	10	329	5.86	#NULL!	2.47	0.97	0.79	#NULL!	30.5	12.1	105	9.26	61	1.12	7.25	#NULL!	25	3.36	3+	-	+	-	-	+	+
1164711	毛炳焯	3	1	1	1	1	#NULL!	17.5	2	10	9	148	5.96	#NULL!	2.82	1.4	25.81	#NULL!	32.2	11.2	77	2.26	30	0.83	7.98	#NULL!	25	2.098	3+	-	-	-	-	+	+
1158579	邹佳先	11	2	3	3	2	#NULL!	33	2	9	7	328	7.53	#NULL!	2.82	1.25	0.01	#NULL!	39.7	14.6	187	2.34	28	0.77	12.87	#NULL!	25	6.704	3+	-	-	-	-	+	+
1158542	李杉杉	7	2	2	2	2	#NULL!	21	2	9	10	406	4.04	#NULL!	3.16	1.38	0.2	#NULL!	36.5	14.1	182	3.56	36	0.98	7.76	#NULL!	#NULL!	2.662	2+	-	-	-	-	+	+
1156157	王智颖	2	2	1	1	2	#NULL!	11	2	10	5	289	5.42	#NULL!	3.17	1.58	10.94	#NULL!	38.1	16.4	140	9.14	35	1.48	9.49	#NULL!	25	0.89	3+	-	-	-	-	+	+
1154024	万晨曦	3	1	1	1	2	#NULL!	16	2	19	4	434	2.51	#NULL!	2.35	1.04	25.08	#NULL!	36	13.4	89	2.89	29	0.93	8.24	#NULL!	25	7.571	±	-	+	-	-	+	+
1146843	李彤彤	14	1	4	4	2	#NULL!	53	2	13	5	330	#NULL!	#NULL!	9.78	0.09	0.01	#NULL!	60.2	35.7	167	6.67	69	1.16	3.53	#NULL!	74.8	3.525	3+	-	-	+	-	+	+
1144352	万明耀	7	1	2	2	2	#NULL!	27	2	18	3	262	#NULL!	#NULL!	4.67	0.97	16.7	#NULL!	38	15.2	106	5.45	44	0.93	7.52	#NULL!	25	1.611	3+	+	-	+	-	+	+
1142840	杨富贵	14	1	4	4	1	#NULL!	42	2	14	30	231	3.55	#NULL!	6.19	1.1	0.01	#NULL!	54.4	30.1	195	4.83	56	1.22	5.18	#NULL!	35.4	12.85	3+	+	-	+	-	+	+
1142760	冉鑫煜	2	1	1	1	2	#NULL!	14	2	13	22	522	7.26	#NULL!	1.04	0.82	46.86	#NULL!	38.9	12.6	60	15.57	34	1.09	7.39	#NULL!	25	3.525	2+	+	+	-	-	-	+
1142757	王维宇	13	2	4	4	2	#NULL!	34	2	6	5	294	#NULL!	#NULL!	4.14	1.1	0.05	#NULL!	44.3	21.1	211	2.98	70	1.09	7.03	#NULL!	25	2.457	2+	-	-	+	-	+	+
1138032	张方俊	5	1	2	2	1	#NULL!	22	2	10	23	383	6.36	#NULL!	3.34	#NULL!	6.69	#NULL!	42.4	21.6	374	6.01	31	1.1	11.58	#NULL!	25	3.222	3+	-	-	-	-	+	+
1137666	李婷婷	15	2	4	4	2	#NULL!	40	2	9	11	266	#NULL!	#NULL!	9.73	0.17	0.02	#NULL!	#NULL!	31.3	#NULL!	#NULL!	#NULL!	#NULL!	5.56	#NULL!	79.3	#NULL!	3+	-	-	+	-	+	+
1137293	罗双	10	1	3	3	1	#NULL!	39	2	14	10	366	3.64	#NULL!	1.19	0.77	0.86	#NULL!	35.7	11.3	68	9.45	54	1.18	15.21	#NULL!	29.2	5.467	3+	+	+	-	-	-	+
1136513	王维林	4	1	2	2	1	#NULL!	22	2	10	30	285	6.11	#NULL!	3.08	1.05	0.87	#NULL!	37.1	12.4	58	2.51	25	0.63	5.77	#NULL!	25	2.861	3+	-	-	-	-	+	+
1134841	罗语涵	2	2	1	1	2	#NULL!	13	2	12	10	409	#NULL!	#NULL!	1.39	1.3	#NULL!	#NULL!	36.9	14.3	30	#NULL!	#NULL!	#NULL!	10.4	#NULL!	#NULL!	#NULL!	3+	+	+	-	-	-	+
1133782	罗浪	6	1	2	2	2	#NULL!	23	2	14	67	345	4.17	#NULL!	2.21	1.21	0.01	#NULL!	39.7	17	#NULL!	6.52	41	1.34	8.87	#NULL!	25	1.581	2+	-	-	-	-	+	+
1133687	田进全	8	1	3	3	2	#NULL!	25	2	8	21	378	#NULL!	#NULL!	9.82	0.08	1000	#NULL!	53	30.1	221	8.3	66	1.42	4.01	#NULL!	693	3.472	2+	-	-	+	-	+	+
1127670	孙瑾萱	2	2	1	1	2	#NULL!	12	2	7	7	288	#NULL!	#NULL!	3.35	0.15	22.71	0.3	#NULL!	22.4	#NULL!	#NULL!	#NULL!	#NULL!	11.46	#NULL!	25	1.158	3+	-	-	-	-	+	+
1124420	何星星	10	2	3	3	2	#NULL!	27	2	11	7	322	#NULL!	#NULL!	4.79	#NULL!	0.28	#NULL!	51.3	24.9	284	4.22	44	0.72	8.06	#NULL!	#NULL!	1.191	3+	+	-	+	-	+	+
1119110	吴海云	11	1	3	3	2	#NULL!	49	2	43	19	487	6.78	#NULL!	10.4	0.66	3.14	#NULL!	30.4	13.22	107	9.27	54	1.37	15.49	#NULL!	25	5.723	2+	-	-	+	-	+	+
1118688	任心月	2	2	1	1	1	#NULL!	13.5	2	17	5	538	7.86	#NULL!	3.44	1.15	29.06	#NULL!	37.5	17.3	47	3.56	31	0.89	9.62	#NULL!	2	3.613	2+	-	-	-	-	+	+
1118138	文昆杨	2	1	1	1	2	#NULL!	12	2	17	7	246	#NULL!	#NULL!	2.73	0.8	45.19	#NULL!	34.1	16.7	127	3.08	24	0.72	11.09	#NULL!	25	0.684	3+	-	-	-	-	+	+
1115144	秦雨劼	4	2	2	2	2	#NULL!	15	2	9	17	270	7.06	#NULL!	0.94	0.79	0.58	#NULL!	32.3	9.3	41	2.68	16	0.86	22.62	#NULL!	25	2.673	±	+	+	-	-	-	+
1114555	张静	13	1	4	4	2	#NULL!	45	2	30	23	300	4.56	#NULL!	0.73	0.77	0.6	#NULL!	26.3	10.1	15	14.76	188	2.23	8.95	#NULL!	25	2.929	±	+	+	-	-	-	+
1111168	郭旭琳	12	1	3	4	2	#NULL!	40	2	12	3	493	#NULL!	#NULL!	2.53	1.43	0.14	#NULL!	40.5	11.6	64	6.44	57	0.79	20.06	#NULL!	#NULL!	9.998	3+	-	+	-	-	+	+
1101748	王思意	3	1	1	1	1	#NULL!	18.5	2	20	7	535	#NULL!	#NULL!	2.37	0.96	1.86	#NULL!	31.4	10.8	85	5.74	35	0.74	6.74	#NULL!	25	4.148	3+	-	+	-	-	+	+
1101049	王诗颖	4	2	2	2	2	#NULL!	21	2	9	2	413	#NULL!	#NULL!	1.73	0.98	3.02	#NULL!	31.4	10.3	46	6.37	37	1.09	12.47	#NULL!	25	2.187	3+	-	+	-	-	-	+
1100132	权杰广	4	1	2	2	2	#NULL!	21	2	8	4	570	#NULL!	#NULL!	1.77	1.1	0.07	#NULL!	#NULL!	14.6	#NULL!	3.98	23	0.74	8.77	#NULL!	25	14.53	3+	-	-	-	-	-	+
1096972	蒋绪燃	4	1	2	2	2	#NULL!	17	2	13	5	343	#NULL!	#NULL!	8.97	1.02	39.84	#NULL!	41.2	16.7	106	2.93	34	1.03	9.58	#NULL!	25	0.861	3+	-	-	+	-	+	+
1096953	杨钰婷	2	2	1	1	2	#NULL!	18	2	6	18	590	#NULL!	#NULL!	1.02	1.16	20.7	#NULL!	48.5	23.3	138	4.71	23	0.98	14.89	#NULL!	25	2.281	3+	+	+	-	-	-	+
1091164	刘雨暄	1	2	1	1	1	#NULL!	10	2	5	10	508	#NULL!	#NULL!	0.91	#NULL!	59.27	#NULL!	29.4	10.6	27	2.09	26	1.32	14.55	#NULL!	#NULL!	#NULL!	1+	+	+	-	-	-	+
1089889	颜晨震	2	2	1	1	1	#NULL!	8	2	20	5	280	#NULL!	#NULL!	0.87	0.9	32.93	#NULL!	26.4	12.4	17	2.74	27	0.85	10.83	#NULL!	25	2.447	3+	+	+	-	-	-	+
1083234	余冲	12	1	3	4	2	#NULL!	47	2	20	34	233	#NULL!	#NULL!	1.51	1.05	17.72	#NULL!	33	14.6	236	11.71	65	2.2	13.68	#NULL!	40.6	8.38	3+	-	+	-	-	-	+
1073075	何罗维	4	1	2	2	1	#NULL!	17	2	18	6	325	#NULL!	#NULL!	2.33	0.9	37.61	#NULL!	33.4	11.7	42	3.15	32	1.01	10.94	#NULL!	25	1.906	3+	-	+	-	-	+	+
1072072	王德友	10	1	3	3	2	#NULL!	30	2	36	2	526	3.71	#NULL!	1.28	1.14	0.01	#NULL!	40.5	12	77	6.11	98	2.43	9.45	#NULL!	#NULL!	9.531	3+	+	+	-	-	-	+
1071976	孙思琪	2	2	1	1	1	#NULL!	12.5	2	15	18	339	#NULL!	#NULL!	1.22	0.68	38.47	#NULL!	38.1	13.1	268	4.38	24	1.31	10.03	#NULL!	#NULL!	1.884	3+	+	+	-	-	-	+
1049511	王桂霞	5	2	2	2	2	#NULL!	19	2	9	7	289	#NULL!	#NULL!	1.77	0.9	1.76	#NULL!	37.6	17	150	3.38	36	1.2	11.02	#NULL!	25	2.633	3+	-	-	-	-	-	+
1046956	向金钱	7	1	2	2	1	#NULL!	40	2	16	7	282	#NULL!	#NULL!	1.33	1.1	#NULL!	#NULL!	30.7	13.1	105	9.19	45	1.1	10.87	#NULL!	25	#NULL!	3+	+	+	-	-	-	+
1045749	姚常吕	9	1	3	3	1	#NULL!	29	2	16	20	315	#NULL!	#NULL!	0.82	0.83	0.64	#NULL!	31.3	12	115	4.48	43	1.51	15.13	#NULL!	25	6.517	3+	+	+	-	-	-	+
1034679	谢欣妍	3	2	1	1	1	#NULL!	14	2	19	7	413	#NULL!	#NULL!	0.79	#NULL!	11.21	#NULL!	31.9	#NULL!	73	#NULL!	#NULL!	#NULL!	#NULL!	#NULL!	#NULL!	#NULL!	3+	+	+	-	-	-	+
1029720	王欣怡	2	2	1	1	2	#NULL!	12.5	2	17	6	594	#NULL!	#NULL!	1.77	0.77	1.83	#NULL!	35.2	11.7	82	2.71	20	0.86	10.18	#NULL!	#NULL!	#NULL!	3+	-	-	-	-	-	+
1020814	杨娅娅	5	2	2	2	1	#NULL!	20	2	11	5	413	5.32	#NULL!	2.56	1.07	#NULL!	#NULL!	37.8	14.5	#NULL!	#NULL!	#NULL!	#NULL!	7.73	#NULL!	#NULL!	2.998	3+	-	+	-	-	+	+
1012246	张缘浩	3	1	1	1	2	#NULL!	16	2	40	4	865	4.25	#NULL!	0.37	0.48	2.52	#NULL!	23.2	7.2	68	9.74	48	1.28	9.62	#NULL!	#NULL!	3.689	3+	+	+	-	-	-	+
1011326	陶铸	12	1	3	4	1	#NULL!	5	2	7	20	343	8.21	#NULL!	1.63	1.02	17.41	#NULL!	30.6	10.7	139	2.6	48	0.82	7.85	#NULL!	#NULL!	17.735	3+	-	+	-	-	-	+
1008789	杨娅娅	5	2	2	2	2	#NULL!	19	2	7	15	347	4.15	#NULL!	1.8	0.76	23.18	#NULL!	35	15.4	134	5.04	41	0.96	7.9	#NULL!	25	2.877	3+	-	-	-	-	-	+
1007776	苟仕叶	3	2	1	1	2	#NULL!	15	2	9	15	441	4.82	#NULL!	1.66	0.73	1.1	#NULL!	38.8	14.4	126	1.91	21	0.84	19	#NULL!	#NULL!	1.166	3+	-	+	-	-	-	+
997435	林博文	8	1	3	3	1	#NULL!	26	1	6	25	261	#NULL!	#NULL!	8.17	0.56	0.01	#NULL!	34.9	34.9	129	4.89	55	0.68	3.75	#NULL!	519	#NULL!	-	+	+	+	-	+	+
987225	田旭燕	12	2	3	4	2	#NULL!	30	1	9	24	427	#NULL!	#NULL!	19	0.3	12.56	#NULL!	82.1	43	244	10.14	95	1.39	5.57	#NULL!	516	#NULL!	±	-	+	+	-	+	+
985605	刘瑞发	13	1	4	4	2	#NULL!	40	1	7	7	303	#NULL!	#NULL!	12.1	0.09	1.78	#NULL!	74.2	45.3	157	4.55	72	1.15	4.54	#NULL!	448.9	#NULL!	-	+	+	+	-	+	+
983550	皮羽翔	9	1	3	3	1	#NULL!	28	1	1	16	207	3.88	#NULL!	13.2	0.07	1.35	#NULL!	#NULL!	25.6	#NULL!	53.31	547	#NULL!	2.87	#NULL!	1060	#NULL!	3+	+	+	+	-	+	+
981143	邹广生	10	1	3	3	2	#NULL!	27	1	12	7	298	#NULL!	#NULL!	14.9	0.38	17.91	#NULL!	72.7	38.3	259	6.6	86	1.63	5.19	#NULL!	215	#NULL!	-	-	+	+	-	+	+
980568	皮婷婷	14	2	4	4	1	#NULL!	48	1	7	7	258	#NULL!	#NULL!	11.2	0.28	57.44	#NULL!	58.3	32.7	148	4.48	65	1.01	3.78	#NULL!	426	#NULL!	-	+	+	+	-	+	+
979948	何双慧	7	2	2	2	1	#NULL!	22	1	15	10	665	7.56	#NULL!	2.25	0.93	0.01	#NULL!	40.3	17.4	191	6.69	35	1.23	10.79	#NULL!	419	8.117	3+	+	+	+	-	+	+
979901	邹林涛	13	1	4	4	1	#NULL!	49	1	26	7	259	4.19	#NULL!	18.9	0.1	1000	#NULL!	#NULL!	42	#NULL!	14.06	234	2.35	#NULL!	#NULL!	470	#NULL!	2+	-	+	+	-	+	+
978291	赵彭荣	14	1	4	4	1	#NULL!	44	1	7	7	387	#NULL!	#NULL!	11.8	0.05	2.61	#NULL!	63.6	37.7	280	3.16	53	1.08	#NULL!	#NULL!	953	#NULL!	-	+	+	+	+	+	+
976795	冉海玲	9	1	3	3	2	#NULL!	21	1	7	15	339	#NULL!	#NULL!	14.5	0.21	1000	#NULL!	#NULL!	36	#NULL!	4.56	74	1.11	3.81	#NULL!	711	#NULL!	3+	-	+	+	-	+	+
970859	邹闽黔	6	1	2	2	2	#NULL!	20	1	8	9	185	2.93	#NULL!	13.6	0.06	26.91	#NULL!	57.1	28.8	89	9.58	65	1.18	2.72	#NULL!	371	#NULL!	2+	+	+	+	-	+	+
970712	田镇引	8	2	3	3	1	#NULL!	21	1	6	10	240	#NULL!	#NULL!	8.31	0.29	0.01	#NULL!	70.8	45.9	216	5.23	38	0.84	#NULL!	#NULL!	354	#NULL!	-	+	+	+	-	+	+
970043	罗小伟	13	1	4	4	2	#NULL!	42	1	11	7	236	#NULL!	#NULL!	20	0.07	#NULL!	#NULL!	63.4	29.4	#NULL!	8.12	73	1.4	2.73	#NULL!	429	#NULL!	2+	-	-	+	-	+	+
969293	郑红霞	14	2	4	4	2	#NULL!	44	1	11	10	259	#NULL!	#NULL!	11.3	0.19	0.87	#NULL!	60.2	33	108	3.03	51	0.79	#NULL!	#NULL!	290	#NULL!	-	+	+	+	-	+	+
962418	张爽	7	1	2	2	1	#NULL!	20	1	9	7	205	#NULL!	#NULL!	16.3	0.26	1.84	#NULL!	63.7	30.3	133	21.51	79	1.78	4.51	#NULL!	288	7.339	2+	+	+	+	-	+	+
958517	罗盼兴	13	2	4	4	2	#NULL!	50	1	17	13	387	#NULL!	#NULL!	21.1	0.06	133.57	#NULL!	#NULL!	28.8	#NULL!	8.93	146	1.68	3.22	#NULL!	2800	#NULL!	-	-	-	+	-	+	+
957981	李苏环	12	1	3	4	2	#NULL!	25	1	8	7	277	#NULL!	#NULL!	10.5	0.06	2.66	#NULL!	#NULL!	34.8	#NULL!	3.91	60	1.33	3.38	#NULL!	190	#NULL!	1+	+	+	+	-	+	+
957232	官伦杰	11	1	3	3	1	#NULL!	28.5	1	11	5	323	#NULL!	#NULL!	12.4	0.19	6.23	#NULL!	61.3	34.3	209	6.96	60	1.25	#NULL!	#NULL!	202	#NULL!	±	+	+	+	-	+	+
956244	杨涛	13	1	4	4	1	#NULL!	38	1	9	5	275	#NULL!	#NULL!	11.8	0.29	0.36	#NULL!	74.9	45.7	309	4.01	68	1.23	2.83	#NULL!	334	#NULL!	-	+	+	+	+	+	+
955300	田美玲	9	2	3	3	2	#NULL!	31	1	13	5	97	#NULL!	#NULL!	10.4	0.2	0.44	#NULL!	54.9	29.9	109	11.27	59	1.34	3.55	#NULL!	260	0.951	2+	+	+	+	-	+	+
943799	任光浪	13	1	4	4	2	#NULL!	27.5	1	9	10	290	#NULL!	#NULL!	12.3	0.79	4.49	#NULL!	72.7	42.4	256	6.62	68	1.32	4.5	#NULL!	468	0.31	-	+	+	+	-	+	+
938306	廖金华	11	1	3	3	2	#NULL!	28.5	1	4	20	217	#NULL!	#NULL!	16.9	0.18	11.81	#NULL!	73.8	42.9	181	#NULL!	#NULL!	#NULL!	3.75	#NULL!	890	#NULL!	-	-	+	+	-	+	+
938100	覃交交	11	2	3	3	1	#NULL!	30	1	26	2	89	4.06	#NULL!	14.8	0.06	1.65	#NULL!	61.5	24.9	24.9	14.81	274	3.21	4.15	#NULL!	313	3.116	2+	-	+	+	-	+	+
938040	黄小波	11	1	3	3	2	#NULL!	19	1	5	13	186	#NULL!	#NULL!	14.7	0.38	0.6	#NULL!	#NULL!	#NULL!	#NULL!	11.41	77	1.39	#NULL!	#NULL!	344	#NULL!	-	-	+	+	-	+	+
936316	王浪	14	1	4	4	2	#NULL!	33	1	7	10	325	#NULL!	#NULL!	20.3	0.28	470.66	#NULL!	#NULL!	#NULL!	#NULL!	4.42	74	1.38	#NULL!	#NULL!	1020	#NULL!	-	-	-	+	-	+	+
929144	罗良超	10	1	3	3	1	#NULL!	31	1	9	4	298	#NULL!	#NULL!	15.98	0.12	351.16	#NULL!	#NULL!	33	118	5.68	47	1.04	3.29	#NULL!	1645	#NULL!	-	-	+	+	-	+	+
927018	杨平胜	8	1	3	3	2	#NULL!	25	1	12	7	229	#NULL!	#NULL!	9.41	0.08	6.23	#NULL!	#NULL!	32.3	#NULL!	13.78	130	2.13	3.3	#NULL!	1352.5	#NULL!	2+	+	+	+	-	+	+
924156	张松	13	1	4	4	2	#NULL!	41	1	11	92	271	#NULL!	#NULL!	14.3	0.38	1.47	#NULL!	77.2	44.7	476	#NULL!	#NULL!	#NULL!	4.49	#NULL!	252.1	#NULL!	-	-	+	+	-	+	+
918951	张文豪	13	1	4	4	1	#NULL!	38	1	8	17	304	#NULL!	#NULL!	13.46	0.29	14.69	#NULL!	69.9	36.1	153	6.38	93	1.48	2.81	#NULL!	494.8	#NULL!	-	+	+	+	-	+	+
908040	杨豪	11	1	3	3	2	#NULL!	32	1	7	15	191	#NULL!	#NULL!	16.37	0.18	1000	#NULL!	#NULL!	#NULL!	#NULL!	5.93	84	1.27	3.58	#NULL!	1584.6	#NULL!	2+	-	+	+	-	+	+
903253	刘涛	13	1	4	4	2	#NULL!	40	1	11	30	209	#NULL!	#NULL!	15.65	0.37	#NULL!	#NULL!	#NULL!	39.9	#NULL!	4.38	54	1.5	#NULL!	#NULL!	367	#NULL!	-	-	+	+	-	+	+
797796	候松	13	1	4	4	2	#NULL!	38	1	7	30	209	#NULL!	#NULL!	13.84	0.14	1000	#NULL!	66.2	33.9	213	3.73	68	1.31	4.69	#NULL!	1235.2	0.653	1+	+	+	+	-	+	+
795597	张玉霞	14	2	4	4	1	#NULL!	34	1	7	10	279	#NULL!	#NULL!	17.16	0.1	385.45	#NULL!	#NULL!	30.7	#NULL!	13.15	109	1.75	5.89	#NULL!	142.3	#NULL!	-	-	+	+	-	+	+
795098	胡运春	14	2	4	4	2	#NULL!	42	1	12	3	348	#NULL!	#NULL!	18.66	0.08	21.32	#NULL!	59.6	27.3	221	9.34	142	2.3	4.11	#NULL!	1780.2	#NULL!	3+	-	+	+	-	+	+
794866	罗国娟	13	2	4	4	2	#NULL!	39	1	22	10	286	#NULL!	#NULL!	8.96	1.1	1000	#NULL!	72.2	44.3	344	7.68	41	0.79	#NULL!	#NULL!	13.9	#NULL!	-	+	+	+	+	+	+
791106	李金锋	8	1	3	3	1	#NULL!	32	1	6	1	185	#NULL!	#NULL!	11.4	0.09	90.35	#NULL!	56.4	33.4	96	7.44	61	1.11	2.77	#NULL!	817.7	#NULL!	3+	+	+	+	-	+	+
789568	翁佳欣	13	2	4	4	1	#NULL!	27	1	12	20	400	#NULL!	#NULL!	15.57	0.24	2	#NULL!	67.9	33.4	156	4.51	47	0.91	4.08	#NULL!	1557.9	#NULL!	-	-	+	+	-	+	+
788750	赵佳佳	10	2	3	3	2	#NULL!	33	1	10	7	145	#NULL!	#NULL!	15.57	0.07	#NULL!	#NULL!	#NULL!	29.9	#NULL!	13.56	81	1.52	4.27	#NULL!	1379.8	#NULL!	-	-	+	+	-	+	+
786784	王体江	14	1	4	4	2	#NULL!	51	1	12	10	129	#NULL!	#NULL!	13.74	0.14	#NULL!	#NULL!	#NULL!	#NULL!	#NULL!	3.77	66	1.29	#NULL!	#NULL!	447.5	#NULL!	-	+	+	+	-	+	+
785709	陆彬丽	10	2	3	3	2	#NULL!	30	1	10	7	275	#NULL!	#NULL!	17.26	0.09	#NULL!	#NULL!	#NULL!	31.2	#NULL!	12.87	68	1.19	3.65	#NULL!	1906.9	#NULL!	-	-	+	+	-	+	+
783850	简旭琴	9	2	3	3	1	#NULL!	28.5	1	9	2	259	#NULL!	#NULL!	10.1	1.05	#NULL!	#NULL!	#NULL!	39.7	#NULL!	2.29	35	0.78	3.2	#NULL!	57	#NULL!	-	+	+	+	-	+	+
783727	王佐臣	12	1	3	4	1	#NULL!	40	1	12	4	289	#NULL!	#NULL!	9.86	0.67	#NULL!	#NULL!	67.8	37	276	3.86	56	1.16	#NULL!	#NULL!	510.8	#NULL!	1+	+	+	+	-	+	+
783446	罗杰	13	1	4	4	2	#NULL!	44.5	1	14	7	130	#NULL!	#NULL!	11.81	0.04	#NULL!	#NULL!	58.7	32.4	#NULL!	5.31	137	1.77	5.14	#NULL!	367	4.263	2+	+	+	+	+	+	+
783346	周万杨	12	1	3	4	1	#NULL!	38	1	12	4	295	#NULL!	#NULL!	16.47	0.29	#NULL!	#NULL!	#NULL!	40	#NULL!	5.66	63	1.13	#NULL!	#NULL!	1617	#NULL!	-	-	+	+	-	+	+
780884	罗明燕	12	1	3	4	2	#NULL!	35	1	20	4	273	#NULL!	#NULL!	14.53	0.14	#NULL!	#NULL!	68.1	29.8	177	8.46	99	1.22	#NULL!	#NULL!	1544.2	#NULL!	-	-	+	+	-	+	+
779690	王瑞杰	14	1	4	4	2	#NULL!	56	1	9	10	251	#NULL!	#NULL!	11.9	0.28	#NULL!	#NULL!	#NULL!	36.7	#NULL!	3.48	78	1.31	#NULL!	#NULL!	343.7	#NULL!	-	+	+	+	+	+	+
779581	潘婷婷	10	2	3	3	2	#NULL!	35	1	13	7	171	#NULL!	#NULL!	13.6	0.1	2	#NULL!	54.7	30.7	109	7.8	75	1.04	2.77	#NULL!	438.5	0.833	1+	+	+	+	-	+	+
779166	袁环	10	2	3	3	2	#NULL!	37.5	1	10	7	115	#NULL!	#NULL!	15.27	0.13	#NULL!	#NULL!	58.2	27.9	101	14.78	101	#NULL!	2.98	#NULL!	1090	#NULL!	-	-	+	+	-	+	+
778919	华艳	13	2	4	4	2	#NULL!	50	1	12	6	402	#NULL!	#NULL!	18.8	0.26	1000	#NULL!	70.9	29.9	310	2.78	51	1.1	#NULL!	#NULL!	264.8	#NULL!	2+	-	+	+	-	+	+
778293	李双斌	11	1	3	3	1	#NULL!	35	1	9	7	250	#NULL!	#NULL!	13.33	0.16	2	#NULL!	62	30.7	185	3.89	60	1.19	#NULL!	#NULL!	139.4	#NULL!	1+	+	+	+	-	+	+
777992	赵龙飞	14	1	4	4	2	#NULL!	56	1	12	10	262	#NULL!	#NULL!	12.01	0.12	#NULL!	#NULL!	#NULL!	#NULL!	#NULL!	#NULL!	#NULL!	#NULL!	#NULL!	#NULL!	935	#NULL!	-	+	+	+	-	+	+
777750	周珊珊	11	2	3	3	1	#NULL!	29	1	8	23	312	#NULL!	#NULL!	14.24	0.43	41.77	#NULL!	73.2	40.8	211	3.52	78	#NULL!	#NULL!	#NULL!	949	0.13	1+	-	+	+	-	+	+
776999	向杰	12	1	3	4	1	#NULL!	42	1	13	2	151	#NULL!	#NULL!	12.06	0.16	#NULL!	#NULL!	#NULL!	35.4	#NULL!	8.12	87	1.3	2.55	#NULL!	230.9	#NULL!	3+	+	+	+	-	+	+
775169	骆礼进	10	2	3	3	2	#NULL!	23	1	35	7	206	#NULL!	#NULL!	19.99	0.03	#NULL!	4.91	66.9	26.6	102	42.71	380	3.6	5.37	#NULL!	1871.6	#NULL!	3+	-	-	+	-	+	+
772859	唐丽兰	13	2	4	4	2	#NULL!	37	1	6	7	204	#NULL!	#NULL!	10.51	0.36	#NULL!	#NULL!	64.2	39.3	197	#NULL!	#NULL!	#NULL!	#NULL!	#NULL!	267.7	#NULL!	-	+	+	+	-	+	+
771915	袁俊杰	6	1	2	2	2	#NULL!	21	1	10	4	323	#NULL!	#NULL!	11.56	0.12	#NULL!	#NULL!	61	33	102	3.46	36	1.04	3.58	#NULL!	91.5	#NULL!	3+	+	+	+	-	+	+
771775	徐浪	3	1	1	1	1	#NULL!	17.5	1	11	4	337	#NULL!	#NULL!	15.35	0.12	#NULL!	#NULL!	#NULL!	32.8	#NULL!	10.89	44	1.62	#NULL!	#NULL!	1725.1	#NULL!	3+	-	+	+	-	+	+
771304	王梅	11	2	3	3	1	#NULL!	42	1	11	7	172	#NULL!	#NULL!	13.26	0.06	#NULL!	#NULL!	63.5	32	218	6.33	97	1.99	4.17	#NULL!	310.4	4.118	3+	+	+	+	-	+	+
770658	朱朋程	8	1	3	3	2	#NULL!	19	1	10	7	299	#NULL!	#NULL!	11.72	0.03	#NULL!	#NULL!	69.8	41.7	326	6.91	41	0.68	3.4	#NULL!	241.9	#NULL!	-	+	+	+	-	+	+
769321	胡枢仲	10	1	3	3	1	#NULL!	21	1	10	4	150	#NULL!	#NULL!	15.55	0.39	#NULL!	#NULL!	#NULL!	28.9	#NULL!	#NULL!	#NULL!	#NULL!	3.19	#NULL!	130.9	#NULL!	3+	-	+	+	-	+	+
767881	尚姗	7	2	2	2	2	#NULL!	21	1	7	5	162	#NULL!	#NULL!	12.91	0.021	#NULL!	#NULL!	55.2	28.7	169	5.15	42	0.83	#NULL!	#NULL!	1487.1	0.07	-	+	+	+	-	+	+
767673	饶顺	12	1	3	4	1	#NULL!	27	1	8	3	276	#NULL!	#NULL!	13.99	0.14	#NULL!	#NULL!	#NULL!	34.5	#NULL!	7.32	47	0.77	2.78	#NULL!	600.7	#NULL!	2+	+	+	+	-	+	+
765258	袁文文	13	2	4	4	1	#NULL!	31	1	19	4	337	#NULL!	#NULL!	16.58	0.05	#NULL!	#NULL!	#NULL!	32.3	#NULL!	3.68	53	0.84	3.7	#NULL!	495.6	#NULL!	3+	-	+	+	-	+	+
764478	赵仁杰	8	1	3	3	1	#NULL!	20	1	8	4	224	#NULL!	#NULL!	9.76	0.27	#NULL!	#NULL!	58.7	33.2	121	6.81	45	0.88	3.18	#NULL!	39.5	#NULL!	1+	+	+	+	-	+	+
763120	蒋天峰	8	1	3	3	1	#NULL!	23	1	10	10	#NULL!	#NULL!	#NULL!	14.02	0.14	#NULL!	#NULL!	64.1	35.3	119	4.68	48	0.77	#NULL!	#NULL!	706.1	#NULL!	-	+	+	+	-	+	+
763111	蒋天宇	11	1	3	3	2	#NULL!	30	1	10	10	236	#NULL!	#NULL!	14.59	0.56	#NULL!	#NULL!	68.7	34.6	143	12.61	71	0.96	3.88	#NULL!	717	#NULL!	3+	-	+	+	-	+	+
763022	杨顺峰	10	1	3	3	1	#NULL!	26	1	10	6	275	#NULL!	#NULL!	9.92	0.12	#NULL!	#NULL!	#NULL!	#NULL!	#NULL!	3.55	59	0.47	#NULL!	#NULL!	317.5	#NULL!	-	+	+	+	-	+	+
763020	肖叶	12	2	3	4	2	#NULL!	37	1	10	7	#NULL!	#NULL!	#NULL!	10.37	0.16	#NULL!	#NULL!	#NULL!	35.8	#NULL!	5.6	54	1	3.67	#NULL!	69.6	#NULL!	3+	+	+	+	-	+	+
763016	肖威	11	1	3	3	2	#NULL!	36	1	9	10	407	#NULL!	#NULL!	10.18	0.39	#NULL!	#NULL!	#NULL!	30.5	#NULL!	4.81	71	1.23	7.27	#NULL!	122	#NULL!	3+	+	+	+	-	+	+
760270	龙波	15	1	4	4	1	#NULL!	34	1	6	15	282	#NULL!	#NULL!	24.56	0.33	#NULL!	#NULL!	77.8	41.4	461	5.21	47	0.76	5.19	#NULL!	175.2	#NULL!	-	-	-	+	-	-	+
759889	徐仕川	12	1	3	4	1	#NULL!	33	1	17	5	82	#NULL!	#NULL!	16.7	0.05	2	#NULL!	61.2	29.5	130	32.48	168	2.15	#NULL!	#NULL!	136.6	#NULL!	3+	-	+	+	-	+	+
757587	冉伟伟	12	1	3	4	2	#NULL!	36	1	12	5	#NULL!	#NULL!	#NULL!	15.28	0.07	#NULL!	#NULL!	#NULL!	29.6	#NULL!	13.77	97	1.45	#NULL!	#NULL!	172	#NULL!	2+	-	+	+	-	+	+
755408	卢红福	14	1	4	4	1	#NULL!	42	1	14	6	240	#NULL!	#NULL!	13.94	0.08	#NULL!	#NULL!	64.7	35.1	322	24.78	164	1.9	4.03	#NULL!	614.1	#NULL!	3+	+	+	+	-	+	+
749407	冉秋雨	2	2	1	1	1	#NULL!	12	1	12	15	277	#NULL!	#NULL!	9.83	0.67	#NULL!	#NULL!	#NULL!	45.1	172	4.42	29	0.75	3.54	#NULL!	68.6	#NULL!	-	+	+	+	-	+	+
747129	袁三朋	13	1	4	4	2	#NULL!	34	1	11	3	197	#NULL!	#NULL!	12.56	0.26	#NULL!	#NULL!	#NULL!	36.6	#NULL!	5.37	48	0.77	3.25	#NULL!	523.9	#NULL!	1+	+	+	+	-	+	+
746484	张杰	11	1	3	3	1	#NULL!	33	1	14	5	135	#NULL!	#NULL!	9.81	0.14	79.39	#NULL!	57.9	31.6	121	5.15	51	0.83	3.07	#NULL!	286	#NULL!	-	+	+	+	-	+	+
732345	宋晓峰	9	1	3	3	1	#NULL!	25	1	11	7	287	#NULL!	#NULL!	18.47	0.38	#NULL!	#NULL!	74.2	37.3	143	5.41	60	#NULL!	3.86	#NULL!	1450.6	#NULL!	-	-	+	+	-	+	+
726520	王飞	14	1	4	4	1	#NULL!	37	1	6	25	225	#NULL!	#NULL!	11.24	0.79	#NULL!	#NULL!	74.3	47.1	381	7.2	60	#NULL!	6.63	#NULL!	252.8	#NULL!	±	+	+	+	-	+	+
722576	张正芹	12	2	3	4	1	#NULL!	35	1	13	5	304	#NULL!	#NULL!	12.41	0.03	#NULL!	#NULL!	#NULL!	32.4	#NULL!	13.64	82	#NULL!	4.45	#NULL!	572.1	#NULL!	-	+	+	+	-	+	+
721013	赵忠义	12	1	3	4	1	#NULL!	34	1	19	10	211	#NULL!	#NULL!	16.38	0.01	#NULL!	#NULL!	60.3	29.9	222	4.8	61	#NULL!	5.21	#NULL!	939	#NULL!	3+	-	+	+	-	+	+
719978	杨家龙	11	1	3	3	1	#NULL!	31	1	16	30	459	#NULL!	#NULL!	7.1	0.77	#NULL!	#NULL!	56	29.9	132	4.64	53	#NULL!	2.82	#NULL!	161.6	#NULL!	-	-	+	+	-	+	+
715991	郑林磊	9	1	3	3	1	#NULL!	25	1	10	7	188	3.7	#NULL!	22.43	0.09	3.77	#NULL!	67.4	30.7	189	32.59	222	#NULL!	3.71	#NULL!	791.7	#NULL!	3+	-	-	+	-	+	+
715710	王开亮	8	1	3	3	2	#NULL!	23	1	6	4	#NULL!	#NULL!	#NULL!	13.76	0.15	#NULL!	#NULL!	56.6	31	#NULL!	6.2	47	#NULL!	3.78	#NULL!	1309	#NULL!	-	+	+	+	-	+	+
714600	吴行行	8	1	3	3	2	#NULL!	23	1	17	7	328	#NULL!	#NULL!	14.82	0.01	#NULL!	#NULL!	59.2	30.5	206	3.78	44	#NULL!	4.51	#NULL!	1224.4	#NULL!	3+	-	+	+	-	+	+
712215	夏松林	14	1	4	4	2	#NULL!	42	1	10	7	292	#NULL!	#NULL!	13.31	0.3	#NULL!	#NULL!	64.7	37.7	258	5.06	59	#NULL!	3.96	#NULL!	420.7	#NULL!	-	+	+	+	-	+	+
711045	何爽	9	1	3	3	1	#NULL!	28	1	11	10	169	#NULL!	#NULL!	9.35	0.06	367.7	#NULL!	55.6	32.7	131	7.15	45	#NULL!	3.08	#NULL!	529.5	#NULL!	3+	+	+	+	-	+	+
709990	林家欢	13	2	4	4	1	#NULL!	58	1	5	6	211	#NULL!	#NULL!	19.38	0.19	41.58	#NULL!	#NULL!	34.7	#NULL!	7.13	64	#NULL!	#NULL!	#NULL!	529.6	#NULL!	-	-	+	+	-	+	+
709311	杨欢	12	2	3	4	1	#NULL!	30	1	11	9	284	#NULL!	#NULL!	14.14	0.1	1000	#NULL!	#NULL!	#NULL!	#NULL!	8	63	#NULL!	#NULL!	#NULL!	771.2	#NULL!	-	+	+	+	-	+	+
708584	蒋涛	7	1	2	2	1	#NULL!	28	1	20	15	161	#NULL!	#NULL!	17.44	0.02	43.32	#NULL!	62.4	28.5	148	22.15	138	#NULL!	#NULL!	#NULL!	239	1.11	3+	-	+	+	-	+	+
708040	何其容	8	2	3	3	1	#NULL!	22	1	12	10	363	#NULL!	#NULL!	19.64	0.16	#NULL!	#NULL!	71.7	35.8	292	5	53	#NULL!	3.62	#NULL!	1690.5	#NULL!	-	-	-	+	-	+	+
707925	杨晓雪	9	2	3	3	1	#NULL!	24	1	10	20	323	#NULL!	#NULL!	17.58	0.42	#NULL!	#NULL!	59.5	35.9	224	7.56	56	#NULL!	#NULL!	#NULL!	792.3	#NULL!	-	-	+	+	-	+	+
707565	田施艳	9	2	3	3	1	#NULL!	23	1	19	15	348	#NULL!	#NULL!	17.28	0.3	#NULL!	#NULL!	72.8	42	316	6.53	53	#NULL!	#NULL!	#NULL!	512	0.12	-	-	+	+	-	+	+
707427	吕鑫亮	12	1	3	4	1	#NULL!	30	1	14	3	253	#NULL!	#NULL!	14.94	0.74	#NULL!	#NULL!	74.4	45.2	375	3.85	43	#NULL!	4.07	#NULL!	21.8	#NULL!	-	-	+	+	-	+	+
706254	喻勇	14	1	4	4	1	#NULL!	35	1	5	20	213	#NULL!	#NULL!	15.28	0.15	#NULL!	#NULL!	#NULL!	#NULL!	#NULL!	#NULL!	#NULL!	#NULL!	4.06	#NULL!	1938	#NULL!	2+	-	+	+	-	+	+
705871	余贤飞	8	1	3	3	1	#NULL!	21	1	13	1	490	#NULL!	#NULL!	23.15	0.2	#NULL!	#NULL!	69.1	30.6	100	12.77	110	#NULL!	4.91	#NULL!	674.7	#NULL!	3+	-	-	+	+	+	+
705115	张永萍	12	2	3	4	2	#NULL!	29	1	13	30	285	#NULL!	#NULL!	12.12	0.36	1000	#NULL!	66.3	39.3	251	6.8	56	#NULL!	4.61	#NULL!	1307	#NULL!	-	+	+	+	-	+	+
704636	宋佳艺	8	1	3	3	2	#NULL!	26	1	16	4	231	#NULL!	#NULL!	24.24	0.2	#NULL!	#NULL!	55.2	28.6	146	22.85	91	#NULL!	5.44	#NULL!	1972.2	5.93	3+	-	-	+	-	-	+
704631	张坤	13	1	4	4	1	#NULL!	45	1	9	6	268	#NULL!	#NULL!	17.05	0.07	#NULL!	#NULL!	58.5	32.6	111	5.83	75	#NULL!	2.41	#NULL!	571	#NULL!	-	-	+	+	-	+	+
704581	张杰	12	1	3	4	1	#NULL!	38	1	16	5	334	#NULL!	#NULL!	12.36	0.16	#NULL!	#NULL!	66.2	30.9	213	16.23	164	#NULL!	2.87	#NULL!	318.5	#NULL!	-	+	+	+	-	+	+
704454	吴小波	12	1	3	4	1	#NULL!	38	1	18	3	239	#NULL!	#NULL!	13.01	0.2	#NULL!	#NULL!	65.4	36.5	181	4.3	58	#NULL!	#NULL!	#NULL!	528.9	#NULL!	1+	+	+	+	-	+	+
702316	何吉江	11	1	3	3	2	#NULL!	30	1	14	8	437	#NULL!	#NULL!	21.52	0.24	#NULL!	#NULL!	#NULL!	#NULL!	#NULL!	#NULL!	#NULL!	#NULL!	4.73	#NULL!	1836.6	0.35	3+	-	-	+	-	+	+
701481	马萌萌	9	1	3	3	1	#NULL!	32.5	1	13	15	394	#NULL!	#NULL!	15.65	0.37	#NULL!	#NULL!	66.7	36.8	199	2.2	38	#NULL!	#NULL!	#NULL!	1881.4	#NULL!	2+	-	+	+	-	+	+
701259	王欢	10	1	3	3	1	#NULL!	25	1	22	8	210	#NULL!	#NULL!	11.86	0.02	#NULL!	#NULL!	57.7	32.3	125	2.8	42	#NULL!	2.75	#NULL!	1048.7	#NULL!	-	+	+	+	+	+	+
699434	谭仲龙	14	1	4	4	1	#NULL!	30.5	1	14	11	331	#NULL!	#NULL!	14.99	0.54	#NULL!	#NULL!	72.9	34.9	285	8.07	65	#NULL!	6.32	#NULL!	1734.1	#NULL!	-	-	+	+	-	+	+
699038	王爱婵	11	2	3	3	1	#NULL!	28	1	9	20	322	#NULL!	#NULL!	12.08	0.12	#NULL!	#NULL!	60.1	32	186	5.64	64	#NULL!	3.9	#NULL!	285.9	1.25	3+	+	+	+	-	+	+
698727	张此秀	12	2	3	4	1	#NULL!	29	1	13	20	370	#NULL!	#NULL!	15.94	0.06	#NULL!	#NULL!	75.5	38.5	270	7.96	96	#NULL!	5.04	#NULL!	2051.8	#NULL!	2+	-	+	+	-	+	+
698119	田见成	11	1	3	3	2	#NULL!	25	1	18	15	203	#NULL!	#NULL!	12.92	0.09	#NULL!	#NULL!	66	35.6	262	9.92	77	#NULL!	4.04	#NULL!	235.3	#NULL!	3+	+	+	+	-	+	+
698115	任双林	8	1	2	2	2	#NULL!	21.5	1	10	15	305	#NULL!	#NULL!	12.76	0.01	#NULL!	#NULL!	66.6	40.5	227	4.78	36	#NULL!	4.27	#NULL!	1186.4	0.19	-	+	+	+	-	+	+
697214	任康	7	1	2	2	1	#NULL!	17	1	14	30	257	#NULL!	#NULL!	11.72	0.7	#NULL!	#NULL!	66.2	40.7	153	2.65	29	#NULL!	3.13	#NULL!	390.7	#NULL!	-	+	+	+	-	+	+
695941	钟彩虹	13	2	4	4	2	#NULL!	26	1	13	7	231	#NULL!	#NULL!	14.55	0.1	#NULL!	#NULL!	72	36.6	292	12.06	69	#NULL!	4.67	#NULL!	857.9	0.27	1+	-	+	+	-	+	+
692631	聂华成	10	1	3	3	2	#NULL!	27.5	1	11	8	152	#NULL!	#NULL!	16.25	0.27	#NULL!	#NULL!	55.2	25.4	138	15.4	174	#NULL!	3.82	#NULL!	1432.2	#NULL!	3+	+	+	-	+	+	+
692590	李豪	10	1	3	3	1	#NULL!	29	1	12	10	193	#NULL!	#NULL!	17.2	0.01	3.87	#NULL!	#NULL!	#NULL!	#NULL!	#NULL!	#NULL!	#NULL!	#NULL!	#NULL!	1476.2	0.07	-	-	+	+	-	+	+
692107	宋俊杰	5	1	2	2	1	#NULL!	20	1	14	8	126	#NULL!	#NULL!	12.34	0.03	2	#NULL!	54.5	28.1	110	14.39	56	#NULL!	3.81	#NULL!	1719.8	2.07	3+	+	+	-	+	+	+
690334	袁林	9	2	3	3	1	#NULL!	21	1	11	13	362	#NULL!	#NULL!	15.96	0.19	148.6	#NULL!	62.2	28.8	143	#NULL!	#NULL!	#NULL!	3.98	#NULL!	1399.6	0.1	2+	-	+	+	-	+	+
689560	张小钗	10	2	3	3	1	#NULL!	34	1	15	17	571	#NULL!	#NULL!	14.14	0.03	#NULL!	#NULL!	58.3	26.9	326	8.43	54	#NULL!	3.76	#NULL!	1693	0.45	2+	+	+	+	-	+	+
686961	王奥华	8	1	3	3	1	#NULL!	22.5	1	14	5	275	#NULL!	#NULL!	15.75	0.01	#NULL!	#NULL!	60.4	23.1	113	20.3	261	#NULL!	10	#NULL!	85	#NULL!	3+	-	+	+	-	+	+
686815	吴飞	14	1	4	4	1	#NULL!	41.5	1	20	7	199	#NULL!	#NULL!	17.26	0.09	#NULL!	#NULL!	54.2	31.7	131	#NULL!	#NULL!	#NULL!	2.57	#NULL!	517.7	#NULL!	2+	-	+	+	-	+	+
685633	廖国旗	12	1	3	4	2	#NULL!	23	1	10	10	225	#NULL!	#NULL!	18.94	0.21	#NULL!	2.44	64.2	30.1	158	8.34	62	#NULL!	2.92	#NULL!	1507.4	#NULL!	2+	-	+	+	-	+	+
681917	王雨婕	9	2	3	3	1	#NULL!	30	1	14	3	482	#NULL!	#NULL!	8.05	1.68	666.7	#NULL!	53.3	14.1	158	#NULL!	#NULL!	#NULL!	10.44	#NULL!	120.9	1.04	3+	+	+	+	-	+	+
681847	何春凡	13	1	4	4	1	#NULL!	32	1	13	20	349	#NULL!	#NULL!	9.68	1.27	#NULL!	1.81	#NULL!	45.6	#NULL!	#NULL!	#NULL!	#NULL!	2.98	#NULL!	516	#NULL!	±	+	+	+	-	+	+
681834	李杰	13	1	4	4	1	#NULL!	48	1	15	10	240	#NULL!	#NULL!	3.89	1.07	#NULL!	#NULL!	38.2	17	191	#NULL!	#NULL!	#NULL!	8.31	#NULL!	631.6	3		+	+	+	-	+	+
680018	任彪	13	2	4	4	2	#NULL!	32	1	13	15	258	#NULL!	#NULL!	24.88	0.15	511.7	#NULL!	#NULL!	#NULL!	#NULL!	#NULL!	119	#NULL!	4.56	#NULL!	627.4	3.01	3+	-	-	+	-	-	+
679849	张权鑫	11	2	3	3	1	#NULL!	34	1	12	1	166	#NULL!	#NULL!	10.15	0.11	#NULL!	#NULL!	54.3	21.07	293	#NULL!	#NULL!	#NULL!	7.18	#NULL!	122	0.75	3+	+	+	+	-	+	+
679374	黄定波	13	1	4	4	1	#NULL!	31	1	14	14	262	#NULL!	#NULL!	14.8	0.55	#NULL!	#NULL!	69.2	37.3	121	3.86	60	#NULL!	2.87	#NULL!	1318.6	#NULL!	-	+	+	+	-	+	+
679231	张卫东	12	1	3	4	1	#NULL!	34	1	13	10	133	#NULL!	#NULL!	19.93	0.19	#NULL!	#NULL!	58.8	32	135	18.51	#NULL!	#NULL!	3.17	#NULL!	323.9	0.5	3+	-	-	+	-	+	+
677871	叶万军	14	1	4	4	2	#NULL!	43	1	10	7	136	#NULL!	#NULL!	8.48	0.12	#NULL!	#NULL!	48.3	27.2	158	10.6	79	#NULL!	2.53	#NULL!	141	#NULL!	+	+	+	+	-	+	+
674274	秦燕	10	2	3	3	1	#NULL!	25	1	16	3	427	#NULL!	#NULL!	15.98	0.39	#NULL!	#NULL!	68.6	35.5	137	4.89	52	#NULL!	3.91	#NULL!	1527.9	#NULL!	-	-	+	+	-	+	+
673392	胡瑞丽	10	2	3	3	1	#NULL!	42	1	8	7	377	#NULL!	#NULL!	21.34	0.14	#NULL!	#NULL!	64.9	30	113	4.33	63	#NULL!	3.01	#NULL!	322.6	#NULL!	3+	-	-	+	-	+	+
668846	谢文杰	13	1	4	4	1	#NULL!	36	1	12	10	189	#NULL!	#NULL!	11.18	0.06	#NULL!	#NULL!	85.4	47.5	416	#NULL!	#NULL!	#NULL!	4.42	#NULL!	1441.7	#NULL!	-	+	+	+	-	+	+
665873	黎安浩	13	1	4	4	1	#NULL!	51	1	13	10	247	#NULL!	#NULL!	18.57	0.37	2	#NULL!	69.3	34.8	249	4.8	76	#NULL!	3.42	#NULL!	1449.2	#NULL!	-	-	+	+	-	+	+
665579	穆小翠	6	2	2	2	2	#NULL!	17.5	1	14	10	260	#NULL!	#NULL!	28.42	0.58	#NULL!	#NULL!	84.5	35.2	246	10.42	70	#NULL!	#NULL!	#NULL!	1561.4	#NULL!	3+	-	-	+	-	-	-
663138	何庆	12	1	3	4	1	#NULL!	30	1	10	30	235	#NULL!	#NULL!	10.61	1.68	2	#NULL!	#NULL!	#NULL!	#NULL!	#NULL!	#NULL!	#NULL!	4.92	#NULL!	1179	#NULL!	-	+	+	+	-	+	+
661215	张荣	14	2	4	4	1	#NULL!	45	1	14	8	142	#NULL!	#NULL!	16.25	0.06	#NULL!	3.44	56.7	29.2	136	22.28	612	#NULL!	#NULL!	#NULL!	319.2	#NULL!	2+	-	+	+	-	+	+
659260	陆定佳	7	1	2	2	1	#NULL!	27	1	9	7	341	#NULL!	#NULL!	13.4	0.57	#NULL!	#NULL!	57.9	26.9	138	8.98	66	#NULL!	3.82	#NULL!	245.8	#NULL!	3+	+	+	+	-	+	+
658510	谭战涛	14	1	4	4	2	#NULL!	51	1	17	4	297	#NULL!	#NULL!	17.29	0.07	#NULL!	#NULL!	61.4	27.7	219	31	286	#NULL!	3.16	#NULL!	61.4	#NULL!	3+	-	+	+	-	+	+
657950	刘超	14	1	4	4	1	#NULL!	36	1	6	60	304	#NULL!	#NULL!	13.54	1.48	#NULL!	#NULL!	73.7	42.8	215	7.3	58	#NULL!	3.21	#NULL!	518.7	#NULL!	-	+	+	+	-	+	+
657519	韦婷婷	14	2	4	4	1	#NULL!	40	1	9	15	476	#NULL!	#NULL!	19.62	0.05	#NULL!	#NULL!	69.2	36.3	333	2.5	54	#NULL!	4.42	#NULL!	1443.5	#NULL!	-	-	-	+	-	+	+
656832	鄢振业	5	1	2	2	1	#NULL!	19.5	1	12	5	123	#NULL!	#NULL!	13.66	0.78	#NULL!	#NULL!	57.9	33.6	93	2.57	25	#NULL!	3.76	#NULL!	2730	#NULL!	±	+	+	+	-	+	+
656617	殷锐	13	1	4	4	1	#NULL!	39	1	11	3	265	#NULL!	#NULL!	13.32	0.1	#NULL!	#NULL!	62.2	33.6	170	#NULL!	#NULL!	#NULL!	3.75	#NULL!	396.7	#NULL!	-	+	+	+	-	+	+
655258	谭兵	13	1	4	4	1	#NULL!	34	1	14	3	184	#NULL!	#NULL!	16.92	0.01	#NULL!	#NULL!	64.4	32.2	122	12.6	82	#NULL!	2.85	#NULL!	315.3	#NULL!	3+	-	+	+	-	+	+
655235	谭思琪	12	2	3	4	1	#NULL!	46	1	10	10	106	#NULL!	#NULL!	10.78	0.44	#NULL!	#NULL!	53.5	30.9	169	8.4	82	#NULL!	2.32	#NULL!	321.7	#NULL!	3+	+	+	+	-	+	+
654768	穆仕海	10	1	3	3	2	#NULL!	29	1	9	7	247	#NULL!	#NULL!	11.75	1	#NULL!	#NULL!	68.8	45.1	200	11.31	44	#NULL!	3.76	#NULL!	722.1	#NULL!	1+	+	+	+	-	+	+
654626	简启飞	13	1	4	4	1	#NULL!	36	1	13	4	217	#NULL!	#NULL!	12.14	0.33	#NULL!	#NULL!	59	33.3	117	3.1	58	#NULL!	2.91	#NULL!	432	#NULL!	-	+	+	+	-	+	+
654461	李坤	14	1	4	4	2	#NULL!	45	1	13	3	301	#NULL!	#NULL!	16.37	0.18	#NULL!	#NULL!	60.6	32.6	194	#NULL!	#NULL!	#NULL!	2.49	#NULL!	316	#NULL!	2+	-	+	+	-	+	+
654004	任廷飞	5	2	2	2	1	#NULL!	18	1	13	5	320	#NULL!	#NULL!	8.69	0.03	#NULL!	#NULL!	#NULL!	32.4	#NULL!	#NULL!	#NULL!	#NULL!	4.65	#NULL!	674	#NULL!	2+	+	+	+	-	+	+
653490	冉江红	12	1	3	4	2	#NULL!	31	1	22	10	349	#NULL!	#NULL!	14.18	0.19	#NULL!	#NULL!	55.6	25.3	151	20.3	133	#NULL!	4.51	#NULL!	504	4.09	2+	-	+	+	-	+	+
653456	李兴宇	13	1	4	4	2	#NULL!	51.5	1	15	7	209	#NULL!	#NULL!	19.93	0.09	#NULL!	#NULL!	64.3	28.8	149	28.2	155	#NULL!	3.99	#NULL!	304	#NULL!	1+	-	-	+	-	+	+
652113	令狐绍斌	7	1	2	2	1	#NULL!	28	1	14	3	235	#NULL!	#NULL!	17.36	0.34	#NULL!	#NULL!	61.2	28.9	74	#NULL!	#NULL!	#NULL!	3.49	#NULL!	465.3	#NULL!	3+	-	+	+	-	+	+
651700	王磊	11	1	3	3	1	#NULL!	28	1	13	6	235	#NULL!	#NULL!	12.81	0.32	#NULL!	#NULL!	59.8	34.5	170	4.5	62	#NULL!	4.07	#NULL!	285.1	#NULL!	-	+	+	+	-	+	+
649719	何俊阳	13	1	4	4	1	#NULL!	50	1	13	4	#NULL!	#NULL!	#NULL!	22.39	0.11	#NULL!	#NULL!	66.8	29.9	181	5.4	63	#NULL!	#NULL!	#NULL!	637.9	#NULL!	+	-	-	+	-	+	+
649194	李小纳	14	1	4	4	1	#NULL!	28	1	28	8	376	#NULL!	#NULL!	19.29	0.58	#NULL!	#NULL!	66.3	13.1	96	5.2	51	#NULL!	15.79	#NULL!	3.8	#NULL!	3+	-	+	+	-	+	+
649169	徐云钊	8	1	3	3	1	#NULL!	25	1	14	6	445	#NULL!	#NULL!	13.8	0.06	#NULL!	#NULL!	62.5	27.1	102	#NULL!	#NULL!	#NULL!	3.49	#NULL!	1195	#NULL!	-	+	+	+	-	+	+
648328	刘鑫	11	1	3	3	2	#NULL!	44	1	12	7	231	#NULL!	#NULL!	13.17	0.06	#NULL!	#NULL!	61.3	35.1	167	2.6	49	#NULL!	4.71	#NULL!	948.5	#NULL!	-	+	+	+	-	+	+
647773	伍倩宇	13	2	4	4	1	#NULL!	48	1	13	5	404	#NULL!	#NULL!	16.82	0.16	#NULL!	#NULL!	71.1	36.9	186	3.1	50	#NULL!	4	#NULL!	1076	#NULL!	1+	-	+	+	-	+	+
647610	彭晓浪	8	1	3	3	1	#NULL!	27	1	6	10	318	#NULL!	#NULL!	13.87	0.05	#NULL!	#NULL!	57.7	31.2	134	11.1	74	#NULL!	3.75	#NULL!	238.2	3.36	3+	+	+	+	-	+	+
647355	何世松	12	1	3	4	1	#NULL!	45	1	12	15	335	#NULL!	#NULL!	17.19	0.66	#NULL!	#NULL!	72.1	37.7	291	5	65	#NULL!	2.45	#NULL!	1358.6	#NULL!	2+	-	+	+	-	+	+
646469	张旭	13	2	4	4	2	#NULL!	17	1	7	3	249	2.82	#NULL!	16.8	0.18	#NULL!	#NULL!	#NULL!	31.9	#NULL!	8.8	#NULL!	#NULL!	#NULL!	#NULL!	1326.8	#NULL!	3+	-	+	+	-	+	+
646022	廖石爱	10	1	3	3	1	#NULL!	28	1	10	15	484	#NULL!	#NULL!	14.98	0.6	#NULL!	#NULL!	53.3	22.1	231	8.8	59	#NULL!	5.29	#NULL!	1159.8	4.56	3+	-	+	+	-	+	+
645457	郑传松	11	1	3	3	2	#NULL!	37	1	13	7	296	#NULL!	#NULL!	15.2	0.56	#NULL!	#NULL!	#NULL!	#NULL!	#NULL!	5.9	58	#NULL!	#NULL!	#NULL!	276.2	#NULL!	-	+	+	+	-	+	+
645428	宋回归	13	1	4	4	1	#NULL!	39	1	10	3	278	#NULL!	#NULL!	15.36	0.12	#NULL!	#NULL!	58.4	28.7	93	6.2	84	#NULL!	2.77	#NULL!	445.7	#NULL!	2+	-	+	+	-	+	+
644916	徐林伦	14	1	4	4	1	#NULL!	57	1	13	10	435	#NULL!	#NULL!	19.64	0.36	#NULL!	#NULL!	73.8	34.4	119	29.8	316	#NULL!	2.84	#NULL!	199.1	#NULL!	2+	-	-	+	-	+	+
644824	王顺奎	10	1	3	3	2	#NULL!	31	1	10	15	337	#NULL!	#NULL!	14.3	0.42	#NULL!	#NULL!	76.1	39.7	250	11.52	#NULL!	#NULL!	6.2	#NULL!	607.5	#NULL!	3+	+	+	+	-	+	+
644820	鞠心意	12	1	3	4	2	#NULL!	34	1	9	10	256	#NULL!	#NULL!	11.06	0.3	#NULL!	#NULL!	64.3	35.6	210	3.47	58	#NULL!	4.16	#NULL!	109.3	#NULL!	1+	+	+	+	-	+	+
644326	王后军	13	1	4	4	1	#NULL!	47	1	10	5	96	2.7	#NULL!	19.5	0.15	#NULL!	#NULL!	59.4	34	116	5.31	52	#NULL!	3.29	#NULL!	416	#NULL!	2+	+	+	+	-	+	+
644073	宋波	12	1	3	4	1	#NULL!	35	1	14	5	456	#NULL!	#NULL!	20.22	0.32	#NULL!	#NULL!	68.2	29.5	155	5.77	75	#NULL!	3.69	#NULL!	1181.8	#NULL!	1+	-	-	+	-	+	+
643059	朱莉娟	9	1	3	3	2	#NULL!	25.5	1	16	6	243	#NULL!	#NULL!	20.31	0.09	#NULL!	#NULL!	67.5	30.7	139	26.4	131	#NULL!	4.16	#NULL!	1102.5	1.51	3+	-	-	+	-	+	+
642227	刘起均	13	1	4	4	1	#NULL!	47	1	19	4	188	#NULL!	#NULL!	29.88	0.23	2	#NULL!	70.1	24.6	82	9.39	75	#NULL!	2.51	#NULL!	456.3	2.68	3+	-	-	+	-	-	-
642075	张宝江	7	1	2	2	2	#NULL!	23	1	14	4	257	3.51	#NULL!	11.91	0.15	#NULL!	#NULL!	55.5	30.7	141	15.6	172	#NULL!	3.16	#NULL!	304.7	0.97	3+	+	+	+	+	+	+
640596	谢飞	8	1	3	3	1	#NULL!	24	1	14	10	257	#NULL!	#NULL!	13.84	0.23	#NULL!	#NULL!	57.2	27.9	120	15.62	137	#NULL!	4.75	#NULL!	495	2.03	3+	+	+	+	-	+	+
640117	李正洲	12	1	3	4	1	#NULL!	34	1	11	4	469	#NULL!	#NULL!	12.87	0.2	#NULL!	#NULL!	#NULL!	#NULL!	#NULL!	#NULL!	#NULL!	#NULL!	3.55	#NULL!	236.3	#NULL!	2+	+	+	+	-	+	+
639125	涂义涛	12	1	3	4	1	#NULL!	38.5	1	15	8	266	#NULL!	#NULL!	16.88	0.15	#NULL!	#NULL!	64.1	30.2	201	5.6	59	#NULL!	2.85	#NULL!	695.8	#NULL!	3+	-	+	+	-	+	+
638662	何云杰	11	1	3	3	1	#NULL!	28	1	13	7	398	#NULL!	#NULL!	16.56	0.3	#NULL!	#NULL!	#NULL!	33.6	#NULL!	3.18	51	#NULL!	3.24	#NULL!	499.7	#NULL!	-	-	+	+	-	+	+
638587	黄俊溢	12	1	3	4	1	#NULL!	36	1	12	3	232	#NULL!	#NULL!	14.45	0.16	2	#NULL!	61	32.8	129	6.7	72	#NULL!	2.86	#NULL!	213.1	#NULL!	2+	-	+	+	-	+	+
635037	朱小刚	11	1	3	3	2	#NULL!	29.5	1	15	6	181	#NULL!	#NULL!	11.72	0.3	#NULL!	#NULL!	59.3	33.9	155	7.3	30	#NULL!	3.64	#NULL!	1070.2	#NULL!	2+	+	+	+	-	+	+
634312	胡安贵	14	1	4	4	1	#NULL!	41	1	6	30	216	#NULL!	#NULL!	3.44	0.74	#NULL!	#NULL!	48.4	29.2	647	7.08	58	#NULL!	8.34	#NULL!	269	#NULL!	-	+	+	+	-	+	+
634128	王源	10	1	3	3	2	#NULL!	22	1	9	10	277	#NULL!	#NULL!	12.72	0.22	#NULL!	#NULL!	79	48.4	342	18.07	637	#NULL!	7.31	#NULL!	173.9	#NULL!	2+	+	+	+	-	+	+
633377	王宇	12	1	3	4	2	#NULL!	39	1	15	10	229	#NULL!	#NULL!	14.75	0.19	#NULL!	#NULL!	78.7	44.9	350	2.93	51	#NULL!	#NULL!	#NULL!	229.3	#NULL!	-	-	+	+	-	+	+
632139	胡俊豪	6	1	2	2	2	#NULL!	25.5	1	23	10	418	#NULL!	#NULL!	2.31	1.12	#NULL!	#NULL!	31.5	11.2	96	4	34	#NULL!	10.34	#NULL!	343	#NULL!	3+	+	+	+	-	+	+
631810	刘成成	9	1	3	3	1	#NULL!	27.5	1	14	6	295	#NULL!	#NULL!	9.7	0.17	#NULL!	#NULL!	56.4	28.2	148	5.9	51	#NULL!	3.94	#NULL!	127	#NULL!	3+	+	+	-	+	+	+
631341	袁淋	14	1	4	4	1	#NULL!	36.5	1	18	10	246	#NULL!	#NULL!	19.87	0.32	#NULL!	#NULL!	#NULL!	#NULL!	#NULL!	7.79	87	#NULL!	5.36	#NULL!	609.3	#NULL!	3+	-	-	+	-	+	+
548823	刘大宁	13	2	4	4	1	#NULL!	42	1	4	3	#NULL!	#NULL!	#NULL!	12.32	0.05	#NULL!	#NULL!	#NULL!	#NULL!	#NULL!	#NULL!	#NULL!	#NULL!	3.68	#NULL!	396.5	#NULL!	-	+	-	+	+	+	+
547644	陆定红	13	2	4	4	1	#NULL!	42	1	14	6	177	#NULL!	#NULL!	17.8	0.46	#NULL!	#NULL!	65.7	29.3	157	7.8	92	#NULL!	2.91	#NULL!	359	#NULL!	-	+	+	+	-	+	+
545196	杨涛	13	2	4	4	1	#NULL!	60	1	13	4	178	#NULL!	#NULL!	12.5	0.28	#NULL!	#NULL!	63.7	32.1	113	6.1	71	#NULL!	#NULL!	#NULL!	1218.3	#NULL!	2+	+	+	+	-	+	+
545012	李林	9	2	3	3	2	#NULL!	30	1	14	3	338	#NULL!	#NULL!	25.39	0.04	2	#NULL!	77.1	31.6	206	8.7	64	#NULL!	3.93	#NULL!	1201.7	#NULL!	-	-	-	+	+	-	+
543058	秦茜娅	7	1	2	2	1	#NULL!	21	1	15	6	#NULL!	#NULL!	#NULL!	16.87	0.01	#NULL!	#NULL!	62.1	27.8	149	5.42	58	#NULL!	4.33	#NULL!	200.7	#NULL!	2+	-	-	+	+	+	+
541817	欧晓杨	13	2	4	4	2	#NULL!	26	1	6	2	251	#NULL!	#NULL!	33.9	0.2	#NULL!	#NULL!	67.5	33.9	277	11.48	81	#NULL!	4.18	#NULL!	753.3	#NULL!	1+	-	-	+	-	-	-
540827	申宏亮	6	2	2	2	2	#NULL!	17	1	11	3	277	#NULL!	#NULL!	8.31	0.6	#NULL!	#NULL!	71.6	43	194	2.84	34	#NULL!	5.51	#NULL!	390.7	#NULL!	-	+	-	+	-	+	+
539791	潘正伟	14	2	4	4	1	#NULL!	42	1	16	7	281	#NULL!	#NULL!	17.5	0.17	#NULL!	#NULL!	68.6	30.7	332	7.44	68	#NULL!	4.22	#NULL!	1051.3	#NULL!	-	-	-	+	-	+	+
538706	粱豪	8	2	3	3	2	#NULL!	28	1	15	6	288	#NULL!	#NULL!	10.31	0.37	12.73	#NULL!	55	27.9	165	2.98	35	#NULL!	3.84	#NULL!	1478.5	#NULL!	3+	+	-	+	-	+	+
537455	姚世界	13	2	4	4	2	#NULL!	39	1	6	1	#NULL!	#NULL!	#NULL!	13.7	0.53	2	#NULL!	69.6	38.6	203	3.41	56	#NULL!	#NULL!	#NULL!	434	#NULL!	-	+	+	+	-	-	+
537307	周亮	11	2	3	3	1	#NULL!	36.5	1	19	6	194	#NULL!	#NULL!	3.65	1.57	#NULL!	#NULL!	40.1	15.8	154	13.41	64	#NULL!	13.89	#NULL!	452.3	1.9	3+	+	-	+	-	+	+
534417	罗双会	11	1	3	3	2	#NULL!	54	1	15	6	266	#NULL!	#NULL!	13.11	0.99	2	#NULL!	56.2	27.7	257	8.9	187	#NULL!	4.84	#NULL!	252.1	6.46	2+	+	-	+	-	+	+
1972675	周城坤	10	1	3	3	2	#NULL!	35	1	7	14	259	#NULL!	1.8	21.1	0.71	2.84	#NULL!	60.5	27.8	108	4.5	57	#NULL!	4.65	#NULL!	2600	#NULL!	+	-	+	+	-	+	+
1968500	胡倬铭	11	1	3	3	1	#NULL!	62	1	7	2	426	#NULL!	1	11.4	0.17	1000	#NULL!	68.6	43.1	291	5.5	60	#NULL!	4.77	#NULL!	447	#NULL!	±	-	+	+	-	+	+
1757201	周成	13	1	4	4	2	#NULL!	55	1	9	7	196	33.5	#NULL!	12.7	0.09	14.56	#NULL!	55.3	29.1	118	15.3	81	1.03	3.27	#NULL!	501	0.14	2+	+	+	+	-	+	+
1755491	何顺	14	1	4	4	2	#NULL!	53	1	7	7	210	#NULL!	#NULL!	13.8	0.1	1000	#NULL!	#NULL!	#NULL!	#NULL!	8.7	72	1.09	3.71	#NULL!	67.4	#NULL!	-	+	+	+	-	+	+
1754556	孙婷	13	2	4	4	2	#NULL!	56.5	1	11	4	319	#NULL!	#NULL!	21.7	0.53	0.028	#NULL!	66.1	31.6	129	3.9	74	0.88	3.67	#NULL!	3390	#NULL!	-	-	-	+	+	+	+
1753005	张家瑞	5	1	2	2	1	#NULL!	20	1	7	1	629	4.51	4.5	19.4	0.32	8.16	4.155	43.9	39.5	69	3.6	70	0.7	5.73	#NULL!	338	#NULL!	-	-	-	+	-	+	+
1748117	谢永龙	9	2	3	3	2	#NULL!	32	1	15	4	307	5.82	#NULL!	10.1	0.09	130.163	#NULL!	55.9	31.7	99	22.6	362	1.19	#NULL!	#NULL!	226.3	#NULL!	1+	+	-	+	+	+	+
1736115	冉宇东	11	2	4	3	1	#NULL!	39	1	11	15	317	#NULL!	#NULL!	16	0.13	28.22	#NULL!	64.1	34.3	154	5	61	0.96	3.28	#NULL!	343	0.06	2+	-	-	+	-	+	+
1734651	汪怡婷	10	1	3	3	2	#NULL!	31	1	26	4	303	#NULL!	#NULL!	20.4	0.06	#NULL!	#NULL!	65.4	26.7	72	6.8	78	0.95	4.28	#NULL!	2730	4.71	3+	-	-	+	+	+	+
1730074	王钦	13	2	4	4	2	#NULL!	55	1	11	3	293	4.75	#NULL!	26.2	0.3	6.54	#NULL!	74.5	34.8	113	3	74	1.16	3.78	#NULL!	640	#NULL!	±	-	-	+	-	-	+
1728837	王显浪	10	2	3	3	2	#NULL!	31	1	8	3	430	2.71	#NULL!	11	0.11	0.11	#NULL!	60.4	34.1	188	4.8	56	1.09	3.71	#NULL!	122	#NULL!	-	+	-	+	+	+	+
1719719	吴亚林	8	2	3	3	2	#NULL!	25	1	7	15	270	2.44	#NULL!	11.6	0.12	#NULL!	#NULL!	63.6	38	257	4.7	53	0.9	5.21	#NULL!	470	#NULL!	±	+	-	+	-	+	+
1714137	郑远丽	13	1	4	4	2	#NULL!	40	1	7	5	279	2.63	#NULL!	10.9	0.19	#NULL!	5.591	56.8	33.1	132	5.9	62	0.81	2.79	#NULL!	226	#NULL!	-	+	-	+	-	+	+
1713546	樊博文	8	1	3	3	2	#NULL!	25	1	8	1	269	5.04	0.917	11.3	1.21	20.64	#NULL!	70.7	42.8	209	6	34	0.67	6.45	#NULL!	121	#NULL!	2+
1709565	蒋静怡	6	1	2	2	2	#NULL!	18	1	9	10	319	5.79	#NULL!	11.9	1.13	0.69	#NULL!	62.4	30.6	236	4.5	42	0.69	8.22	#NULL!	643	1.342	2+	+	-	+	-	+	+
1709349	侯加露	13	2	4	4	2	#NULL!	52	1	5	12	328	#NULL!	0.711	12.4	0.16	18.12	#NULL!	63	36.7	319	5.5	72	1.12	4.1	#NULL!	220	#NULL!	2+	+	-	+	-	+	+
1704327	何振华	13	1	4	4	2	#NULL!	54	1	18	14	284	2.98	13.441	13.7	0.08	132.94	#NULL!	58.4	29.6	107	10.77	93	1.59	3.17	#NULL!	1560	#NULL!	3+
1702771	吴海洋	13	2	4	4	2	#NULL!	44	1	5	7	397	3.76	1.092	10.5	0.22	10.76	#NULL!	34.8	38.3	87	10.24	67	1.22	4.28	#NULL!	635	3.697	3+	+	-	+	-	+	+
1699277	侯勇	9	2	3	3	2	#NULL!	25.5	1	8	7	421	3.38	2.583	12.1	0.1	1.39	#NULL!	63.1	34	187	3.48	59	0.93	4.97	#NULL!	741	#NULL!	±	+	-	+	+	+	+
1687622	罗晨艺	5	2	2	2	2	#NULL!	19	1	6	7	294	2.47	0.823	7.4	0.06	#NULL!	3.875	55.2	36.2	181	4.78	49	0.76	3.46	#NULL!	114	0.01	-
1684139	徐好	14	1	4	4	2	#NULL!	53	1	17	7	465	3.55	3.436	13.5	0.09	0.23	#NULL!	63.9	30.4	194	9.44	136	1.63	3.84	#NULL!	1460	0.419	3+	+	-	+	+	+	+
1681184	王家乐	14	2	4	4	2	#NULL!	39	1	7	3	268	4.34	#NULL!	32.2	0.31	#NULL!	#NULL!	80.6	28.4	164	8.68	74	1.2	3.77	#NULL!	2650	0.162	1+	-	-	+	-	-	-
1680277	吴镇亮	12	2	3	4	2	#NULL!	43	1	9	7	286	#NULL!	#NULL!	21.6	0.14	93.24	#NULL!	66.4	32.1	32.1	4.19	48	0.9	3.71	#NULL!	215	#NULL!	±	-	-	+	-	+	+
1680276	吴俊涛	14	2	4	4	2	#NULL!	39	1	9	3	214	2.7	#NULL!	17.7	0.09	503.29	#NULL!	62.3	31	105	4.05	56	0.97	3.13	#NULL!	235	#NULL!	-	-	-	+	+	+	+
1680275	吴远涛	15	2	4	4	2	#NULL!	57	1	9	2	265	#NULL!	#NULL!	30.1	0.06	26.82	#NULL!	72.5	34	80	9.84	75	1.2	2.82	#NULL!	429	0.798	-	-	-	+	+	-	-
1679745	郑前艳	13	1	4	4	2	#NULL!	67	1	10	4	276	4.12	#NULL!	16.5	0.19	7	#NULL!	59.7	30.6	117	3.49	53	0.9	2.74	#NULL!	1060	0.15	±	-	-	+	-	+	+
1679473	郑紫薇	9	1	3	3	2	#NULL!	25	1	8	2	283	3.55	#NULL!	16.9	0.15	5.23	#NULL!	64.1	34.7	123	6.74	45	0.66	3.02	#NULL!	470	0.025	-	-	-	+	-	+	+
1679260	郑青艳	12	1	3	4	2	#NULL!	37	1	12	2	270	3.77	#NULL!	20.4	0.13	83.23	#NULL!	68.7	31.8	100	9.35	70	0.95	3.06	#NULL!	618	0.212	±	-	-	+	-	+	+
1660005	韩瑞阳	13	2	4	4	1	#NULL!	32	1	7	3	225	3.74	#NULL!	14	0.5	0.86	#NULL!	65.3	40.9	134	4.25	58	0.82	3.32	#NULL!	434	#NULL!	-	+	-	+	-	+	+
1658076	余应灵	13	2	4	4	1	#NULL!	48	1	10	3	234	2.63	#NULL!	11.5	0.23	#NULL!	#NULL!	55.9	31.5	165	6.34	65	1.16	3.73	#NULL!	399	0.026	±	+	-	+	-	+	+
1655717	雷宇航	12	2	3	4	1	#NULL!	47.5	1	7	3	455	3.16	#NULL!	12.8	0.11	3.45	#NULL!	63.4	34.3	149	3.49	60	1.16	4.28	#NULL!	675	#NULL!	-	+	-	+	-	+	+
1655118	何豪杰	13	2	4	4	2	#NULL!	38	1	7	7	293	2.64	#NULL!	9.47	0.26	1.6	#NULL!	62.3	36.7	171	6.29	55	0.68	3.66	#NULL!	212	#NULL!	-	+	-	+	-	+	+
1650464	任星瑾	13	2	4	4	2	#NULL!	40	1	14	7	415	6.59	#NULL!	18.8	0.47	611.63	#NULL!	74.6	33.3	125	10.06	131	1.49	#NULL!	#NULL!	2000	1.027	±	-	-	+	-	+	+
1645740	黎飞翔	12	2	3	4	2	#NULL!	33.5	1	9	7	318	#NULL!	#NULL!	10.8	0.82	80.75	3.754	62.7	39.5	198	3.21	62	1.01	3.63	#NULL!	163	#NULL!	-	+	-	+	-	+	+
1645610	张金	13	2	4	4	2	#NULL!	61	1	11	7	342	2.86	#NULL!	22.4	0.14	#NULL!	#NULL!	#NULL!	31.5	#NULL!	#NULL!	61	1.29	#NULL!	#NULL!	635	#NULL!	-	-	-	+	-	+	+
1644802	杨垚	12	2	3	4	2	#NULL!	29	1	13	21	404	5.28	#NULL!	15.1	0.18	#NULL!	#NULL!	65.5	32.6	148	6.56	117	1.63	4.78	#NULL!	901	#NULL!	2+	-	-	+	-	+	+
1642080	肖田燕	10	1	3	3	2	#NULL!	45	1	8	2	169	2.77	#NULL!	10.4	0.26	58.92	#NULL!	73.3	42.2	253	4.77	51	0.91	3.3	#NULL!	138	#NULL!	-	+	-	+	-	+	+
1626656	谭富婷	9	1	3	3	2	#NULL!	24	1	10	7	293	4.51	#NULL!	14.3	0.19	6.25	#NULL!	63.6	31.5	178	12.2	97	1.8	5.62	#NULL!	1140	#NULL!	2+	-	-	+	-	+	+
1611233	李升盈	13	1	4	4	2	#NULL!	48	1	16	3	150	4.02	#NULL!	10.7	0.14	0.18	#NULL!	61.2	35.1	174	12.41	100	1.3	3.04	#NULL!	724	2.297	2+	+	-	+	-	+	+
1609413	梁羽	14	1	4	4	2	#NULL!	34	1	10	10	315	3	#NULL!	11	0.06	1.35	#NULL!	59.9	37.2	265	3.56	53	0.59	#NULL!	#NULL!	918	0.387	-	+	-	+	+	+	+
1597160	田敏敏	11	1	3	3	2	#NULL!	37	1	9	60	210	2.2	#NULL!	8.77	0.7	#NULL!	#NULL!	65.6	44.6	219	3.3	49	1.01	3.03	#NULL!	176	#NULL!	-	+	-	+	-	+	+
1590922	王雪	13	1	4	4	2	#NULL!	51	1	7	15	492	2.6	#NULL!	9.88	0.42	#NULL!	#NULL!	#NULL!	#NULL!	#NULL!	4.22	39	0.79	3.82	#NULL!	394	#NULL!	-	+	-	+	-	+	+
1590365	李梦竹	12	1	3	4	2	#NULL!	50	1	8	30	249	#NULL!	#NULL!	14.3	0.13	3.86	#NULL!	59.1	32.9	220	2.57	48	0.9	4.41	#NULL!	122	1.499	2+	+	-	+	-	-	+
1590315	李智兴	8	2	3	3	2	#NULL!	32	1	8	6	271	2.95	#NULL!	11.5	0.06	#NULL!	#NULL!	57	31.7	161	7.8	52	0.94	3.08	#NULL!	663	#NULL!	3+	+	-	+	+	+	+
1589318	汤光伟	10	2	3	3	2	#NULL!	25	1	25	15	190	5.14	#NULL!	18	0.81	#NULL!	#NULL!	66.5	32	283	17.34	349	3.17	#NULL!	#NULL!	3840	#NULL!	2+	-	-	+	-	+	+
1586467	穆宇函	13	2	4	4	2	#NULL!	36	1	6	30	235	2.38	#NULL!	15.4	0.11	3.42	#NULL!	63.7	30	186	7.77	76	1.1	4.54	#NULL!	519	2.186	1+	-	-	+	-	+	+
1585551	李欣益	12	2	3	4	2	#NULL!	32	1	5	4	168	#NULL!	#NULL!	10.7	0.09	1.44	#NULL!	64.8	37.3	128	3.23	58	0.99	3.5	#NULL!	419	0.199	-	+	-	+	+	+	+
1585110	耿伟杰	13	2	4	4	2	#NULL!	37	1	5	21	324	#NULL!	#NULL!	14.2	0.98	0.09	#NULL!	76	42.1	278	5.17	48	0.77	4.19	#NULL!	756	#NULL!	-	-	-	+	-	+	+
1583588	张浩翼	11	2	3	3	2	#NULL!	30	1	9	5	324	#NULL!	#NULL!	11.1	0.09	0.24	12.095	49.8	19.9	121	5.33	52	0.97	4.96	#NULL!	416	6.473	3+	+	-	+	+	+	+
1581146	官火航	11	2	3	3	2	#NULL!	30	1	7	7	213	#NULL!	#NULL!	23.8	0.25	1.68	#NULL!	82.8	35.4	280	6.76	62	0.83	2.18	#NULL!	1100	#NULL!	-	-	-	+	-	+	+
1580807	杨浩然	6	1	2	2	1	#NULL!	40	1	8	4	222	2	#NULL!	13	0.06	#NULL!	#NULL!	#NULL!	32.8	#NULL!	8.99	49	1.48	#NULL!	#NULL!	585	1.796	3+	+	-	+	+	+	+
1578370	张远松	14	2	4	4	2	#NULL!	48	1	12	5	410	5.06	#NULL!	22.2	0.2	126.24	#NULL!	73.6	30.8	140	5.06	83	1.12	2.18	#NULL!	953	#NULL!	-	-	-	+	-	+	+
1578340	高忠粒	13	2	4	4	2	#NULL!	45	1	7	4	328	2.77	#NULL!	14.5	0.11	1.45	#NULL!	64	31.9	154	6.09	92	1.47	3.09	#NULL!	228	0.059	-	-	-	+	+	+	+
1577415	李梅	13	1	4	4	2	#NULL!	38	1	5	10	354	#NULL!	#NULL!	16.1	0.13	3.19	#NULL!	70.4	36.6	229	5.97	59	1.18	4.43	#NULL!	993	0.131	-	-	-	+	-	+	+
1575326	王万军	14	2	4	4	2	#NULL!	36	1	9	7	375	3.85	#NULL!	20.2	0.07	#NULL!	#NULL!	77.1	39.3	320	9.22	75	1.27	#NULL!	#NULL!	914	#NULL!	-	-	-	+	+	+	+
1574888	袁峰	11	2	3	3	2	#NULL!	32	1	6	6	201	#NULL!	#NULL!	17.9	0.18	#NULL!	#NULL!	70.4	34.5	156	3.43	66	1.1	3.8	#NULL!	593	#NULL!	-	-	-	+	-	+	+
1574091	田爽	13	2	4	4	2	#NULL!	40	1	3	15	294	2.81	#NULL!	13.2	0.51	#NULL!	#NULL!	64.1	37.1	245	9.8	77	1.4	4.49	#NULL!	269	0.245	-	+	-	+	-	+	+
1573725	蒋宇超	13	2	4	4	2	#NULL!	52	1	8	1	289	#NULL!	#NULL!	8.44	0.07	67.11	#NULL!	55.9	33	251	4.56	73	0.97	#NULL!	#NULL!	201	0.816	-	+	-	+	+	+	+
1573205	胡智彦	13	2	4	4	2	#NULL!	40	1	9	6	347	2.95	#NULL!	15.1	0.06	1.38	#NULL!	59.4	32.2	170	3.97	59	0.79	3.54	#NULL!	461	#NULL!	-	-	-	+	+	+	+
1572600	刘会金	14	2	4	4	2	#NULL!	60	1	8	5	171	3.06	#NULL!	10.8	0.13	5.53	#NULL!	#NULL!	#NULL!	#NULL!	2.74	53	0.87	3.11	#NULL!	399	#NULL!	2+	+	-	+	-	+	+
1572594	苏乐山	13	2	4	4	2	#NULL!	51	1	8	4	308	#NULL!	#NULL!	21.7	0.08	#NULL!	#NULL!	67.2	35.9	245	1.88	47	0.91	3.93	#NULL!	367	#NULL!	1+	-	-	+	+	+	+
1571950	唐姣宇	14	2	4	4	1	#NULL!	33	1	6	15	463	#NULL!	#NULL!	12.3	0.6	9.67	#NULL!	68	37.5	237	5.38	73	1.13	5.58	#NULL!	128	0.703	-	+	-	+	-	+	+
1571469	罗苗苗	8	1	3	3	2	#NULL!	22	1	15	5	422	#NULL!	#NULL!	20.2	0.06	1.82	#NULL!	71.9	30.1	165	31.32	361	3.53	4.38	#NULL!	2560	#NULL!	-	-	-	+	+	+	+
1569679	聂浩阳	13	2	4	4	2	#NULL!	40	1	7	7	212	#NULL!	#NULL!	9.66	0.11	#NULL!	#NULL!	55.3	40.4	232	5.81	63	0.94	4.06	#NULL!	159	#NULL!	-	+	-	+	+	+	+
1569114	吴进康	12	2	3	4	2	#NULL!	32	1	4	20	336	#NULL!	#NULL!	12	0.22	13.59	#NULL!	68.1	41.8	233	3.62	46	0.77	5.1	#NULL!	282	#NULL!	-	+	-	+	-	+	+
1567957	唐润	10	2	3	3	1	#NULL!	39	1	8	7	376	5	#NULL!	15.3	0.1	#NULL!	#NULL!	66	33.3	153	5.76	83	1.26	4.64	#NULL!	432	1.362	3+	-	-	+	+	+	+
1566919	林杰	12	2	3	4	2	#NULL!	35	1	8	3	223	#NULL!	#NULL!	18.2	0.11	#NULL!	#NULL!	#NULL!	#NULL!	244	4.28	57	1.01	2.19	#NULL!	975	#NULL!	2+	-	-	+	-	+	+
1564565	李浩轩	2	1	1	1	1	#NULL!	30	1	13	10	275	#NULL!	#NULL!	16	0.34	#NULL!	#NULL!	64.7	31	256	19.82	255	1.76	4.78	#NULL!	516	#NULL!	2+	-	-	+	-	+	+
1561122	钟明旭	10	8	3	3	1	#NULL!	54	1	8	4	335	#NULL!	#NULL!	14.2	0.11	0.94	#NULL!	66.9	35.3	167	8.15	51	1.03	4.64	#NULL!	239	0.465	2+	-	-	+	-	+	+
1560340	罗佳勤	11	1	3	3	2	#NULL!	52	1	8	7	198	#NULL!	#NULL!	12.7	0.21	0.94	#NULL!	59.4	31.4	138	4.84	67	1.25	2.76	#NULL!	1150	0.336	2+	+	-	+	-	+	+
1555331	倪蕊佳	11	1	3	3	2	#NULL!	35	1	3	1	331	2.85	#NULL!	7.75	0.93	#NULL!	#NULL!	64.8	41.6	174	2.88	36	0.68	3.17	#NULL!	344	#NULL!	-	+	-	+	-	+	+
1553657	马飘飘	11	1	3	3	2	#NULL!	36	1	10	7	260	3.22	#NULL!	17.2	0.06	0.26	#NULL!	74	28.5	302	9.81	57	1.08	2.96	#NULL!	1050	#NULL!	2+	-	-	+	+	+	+
1553544	史阅兵	13	1	4	4	2	#NULL!	30	1	8	7	234	#NULL!	#NULL!	11.3	0.1	16.72	#NULL!	64.3	31.1	169	4.32	75	1.19	2.98	#NULL!	287	#NULL!	1+	+	-	+	+	+	+
1552617	田澜澜	6	2	2	2	2	#NULL!	18	1	14	14	373	#NULL!	#NULL!	14.5	0.08	#NULL!	#NULL!	#NULL!	31.3	#NULL!	5.13	45	1.05	4.77	#NULL!	3400	1.92	2+	-	-	+	+	+	+
1552051	田翔霏	10	2	3	3	2	#NULL!	30	1	9	5	338	#NULL!	#NULL!	13.8	0.13	183.62	#NULL!	64.9	34.9	119	3.62	40	0.81	3.54	#NULL!	173	#NULL!	-	+	-	+	-	+	+
1548535	田青海	12	2	3	4	2	#NULL!	42	1	6	15	272	2.64	#NULL!	14	0.89	#NULL!	#NULL!	72.3	39.8	206	3.27	60	0.97	2.61	#NULL!	163	#NULL!	1+	+	-	+	-	+	+
1547849	邵明旺	11	2	3	3	2	#NULL!	40	1	7	7	480	#NULL!	#NULL!	13.9	0.36	#NULL!	#NULL!	#NULL!	39.6	#NULL!	8.47	68	1.06	#NULL!	#NULL!	426	#NULL!	±	+	-	+	-	+	+
1546874	夏雪	12	1	3	4	2	#NULL!	31	1	8	4	325	#NULL!	#NULL!	13.2	0.19	5.2	#NULL!	#NULL!	34.2	#NULL!	20.19	99	0.99	3.64	#NULL!	461	1.144	2+	+	-	+	-	+	+
1544533	杨道建	12	1	3	4	2	#NULL!	55	1	13	5	200	4.4	#NULL!	15	0.08	0.2	#NULL!	70.3	32.7	216	9.73	87	1.23	5.85	#NULL!	187	1.015	3+	-	-	+	+	+	+
1539819	赵江鸿	10	1	3	3	2	#NULL!	32	1	7	7	271	#NULL!	#NULL!	13.9	0.09	1.43	#NULL!	63.4	35.9	147	8.1	67	#NULL!	2.67	#NULL!	139	#NULL!	2+	+	-	+	+	+	+
1537263	刘腾兴	13	1	4	4	2	#NULL!	47	1	10	10	203	3.69	#NULL!	19.4	0.11	0.6	#NULL!	63.1	30.5	146	10.26	71	1.21	3.52	#NULL!	202	#NULL!	-	-	-	+	+	+	+
1524669	赵远洋	10	1	3	3	2	#NULL!	26.5	1	7	5	292	2.38	#NULL!	11	0.09	118.64	#NULL!	68.1	31.8	197	4.69	47	0.68	3.95	#NULL!	382	0.212	-	+	-	+	+	+	+
1522683	张其俊	10	1	3	3	2	#NULL!	38	1	7	5	235	1.6	#NULL!	15.9	0.06	0.001	#NULL!	55.8	31.1	177	4.97	67	0.87	3.93	#NULL!	786	#NULL!	-	-	-	+	+	+	+
1522657	林选清	14	1	4	4	2	#NULL!	55	1	9	10	312	2.81	#NULL!	30	0.14	#NULL!	#NULL!	72.8	31.8	222	9.63	164	1.41	2.97	#NULL!	676	#NULL!	-	-	-	+	-	-	-
1518812	缪翔	13	1	4	4	2	#NULL!	67	1	8	20	157	2.63	#NULL!	13.9	0.07	4.07	#NULL!	59.7	30.8	134	3.28	64	0.98	3.07	#NULL!	811	1.171	2+	+	-	+	+	+	+
1477686	令狐泽栋	12	1	3	4	1	#NULL!	31	1	16	6	237	#NULL!	#NULL!	23.2	0.23	2.04	#NULL!	72.4	31	156	4.15	58	1.03	3.74	#NULL!	2290	2.372	1+	-	-	+	-	+	+
1475038	张广艳	9	2	3	3	2	#NULL!	26	1	10	10	406	2.73	#NULL!	14.8	0.14	#NULL!	#NULL!	75.3	29.1	271	3.34	45	0.69	4.65	#NULL!	512	#NULL!	1+	-	-	+	-	+	+
1473096	吴家豪	7	1	2	2	2	#NULL!	36	1	7	7	248	#NULL!	#NULL!	11	0.09	#NULL!	#NULL!	58.6	34.4	151	4.66	66	0.69	3.15	#NULL!	745	0.08	±	+	-	+	+	+	+
1472064	吴燕子	12	2	3	4	2	#NULL!	55	1	11	7	228	#NULL!	#NULL!	17.1	0.08	0.89	#NULL!	70.6	37.2	258	4.99	90	1.35	4.25	#NULL!	2100	0.412	2+	-	-	+	+	+	+
1468567	肖皓轩	6	1	2	2	2	#NULL!	20	1	16	30	262	4.33	#NULL!	4.38	0.56	4.03	#NULL!	51.1	27.1	182	5.69	59	1.06	5.04	#NULL!	516	3.719	3+	+	+	+	-	+	+
1468513	杨星	11	1	3	3	2	#NULL!	49	1	8	2	268	#NULL!	#NULL!	12.3	0.2	1.37	#NULL!	70	37.6	242	3.85	61	1.01	3.71	#NULL!	691	2.73	2+	+	+	+	-	+	+
1467716	王腾	6	1	2	2	2	#NULL!	26	1	12	5	339	#NULL!	#NULL!	13.6	0.71	481.31	#NULL!	#NULL!	#NULL!	#NULL!	22.61	89	1.66	4.32	#NULL!	813	3.703	3+	+	+	+	-	+	+
1467132	赵远欢	13	1	4	4	2	132	37	1	23	30	182	4.22	#NULL!	16	0.1	0.85	#NULL!	53.8	23.1	93	25.79	291	2.96	#NULL!	#NULL!	144	2.288	3+	-	+	+	-	+	+
1463851	胡小兰	12	2	3	4	2	#NULL!	38	1	8	12	383	#NULL!	#NULL!	10.8	0.2	0.23	#NULL!	55	24.9	113	4.23	62	0.98	5.21	#NULL!	523	#NULL!	3+	+	+	+	-	+	+
1460606	令狐佳文	13	1	4	4	2	#NULL!	40.5	1	8	3	244	#NULL!	#NULL!	16.5	0.15	0.001	#NULL!	67.3	37.3	103	9.74	83.4	1.83	3.78	#NULL!	516	0.46	3+	-	+	+	-	+	+
1457367	王艳	9	2	3	3	2	#NULL!	26	1	20	6	245	3.66	#NULL!	20.1	0.07	0.46	#NULL!	54.2	25.7	127	29.93	594	3.15	3.7	#NULL!	252.1	1.259	3+	-	-	+	-	+	+
1450213	罗小芳	12	2	3	4	2	#NULL!	34	1	9	7	217	#NULL!	#NULL!	19	0.06	1.99	#NULL!	64.4	32.2	143	5.92	65	1.06	3.77	#NULL!	649	0.392	1+	-	+	+	-	+	+
1448701	杨振宇	11	1	3	3	2	#NULL!	40	1	10	3	332	3.43	#NULL!	17.4	0.07	1.94	#NULL!	84.7	43.8	338	8.95	72	1.46	3.81	#NULL!	267	#NULL!	-	-	+	+	-	+	+
1448143	余琴	13	2	4	4	2	#NULL!	38.5	1	6	10	210	#NULL!	#NULL!	13.4	0.07	1.3	#NULL!	71.3	37.7	255	7.45	107	1.95	3.92	#NULL!	193	#NULL!	2+	+	+	+	-	+	+
1441391	冉佳韩	4	2	2	2	1	#NULL!	17.5	1	11	7	331	#NULL!	#NULL!	18.1	0.08	107.63	#NULL!	68.7	29.2	192	7.04	116	1.44	#NULL!	#NULL!	1290	0.739	1+	-	+	+	-	+	+
1438250	张自嘉	14	1	4	4	2	#NULL!	46.5	1	7	3	289	#NULL!	#NULL!	12.3	0.11	45.82	#NULL!	80	44.5	278	7.14	66	1.23	#NULL!	#NULL!	1060	#NULL!	-	+	+	+	-	+	+
1436128	张加兴	9	2	3	3	2	#NULL!	25	1	11	7	406	4.4	#NULL!	12.7	0.06	214.62	#NULL!	54.6	28.5	102	12.61	75	1.67	4.97	#NULL!	1560	7.404	4+	+	+	+	-	+	+
1435199	詹迪	12	2	3	4	2	#NULL!	40	1	8	30	251	#NULL!	#NULL!	15.8	0.36	2.13	#NULL!	60.8	30.8	168	9.2	95	1.7	3.89	#NULL!	285	2.72	3+	-	+	+	-	+	+
1431669	梁丹	14	2	4	4	2	#NULL!	54	1	7	5	322	#NULL!	#NULL!	8.6	0.07	#NULL!	#NULL!	#NULL!	#NULL!	#NULL!	6.63	75	1.36	#NULL!	#NULL!	220	#NULL!	-	+	+	+	-	+	+
1429541	姚洋	10	1	3	3	2	#NULL!	35	1	10	4	296	#NULL!	#NULL!	18.1	0.24	0.001	#NULL!	83.9	38.2	341	4.82	48	0.9	4.35	#NULL!	1070	3.952	3+	-	+	+	-	+	+
1425115	王鹏凯	9	1	3	3	2	#NULL!	30	1	8	4	145	#NULL!	#NULL!	13.3	0.06	0.81	#NULL!	60.1	32.9	100	16.47	94	1.58	3.43	#NULL!	500	#NULL!	4+	+	+	+	-	+	+
1397337	马亮亮	10	1	3	3	1	#NULL!	23	1	8	7	563	3.15	#NULL!	2.94	0.92	0.78	#NULL!	45.9	22.8	291	5.09	46	0.89	8.52	#NULL!	367	1.495	3+	+	+	+	-	+	+
1395971	王浱浩	13	1	4	4	2	#NULL!	63	1	12	15	204	#NULL!	#NULL!	12.9	0.26	360.11	#NULL!	62.2	27.2	293	4.09	70	1.17	#NULL!	#NULL!	768	2.69	3+	+	+	+	-	+	+
1395457	熊进军	13	1	4	4	2	#NULL!	32	1	12	30	#NULL!	3.39	#NULL!	9.9	0.79	170.4	#NULL!	68.4	39	258	7.11	101	2.25	5.54	#NULL!	269	0.791	1+	+	+	+	-	+	+
1392138	刘莲艳	14	2	4	4	2	#NULL!	55	1	8	13	122	#NULL!	#NULL!	13.8	0.63	3.59	#NULL!	66.9	37	199	8.35	69	0.73	3.85	#NULL!	273	#NULL!	1+	+	+	+	-	+	+
1390930	严雪	13	1	4	4	2	#NULL!	38.5	1	5	30	164	3.26	#NULL!	8.16	0.71	4.79	#NULL!	#NULL!	#NULL!	#NULL!	7.37	150	2.3	3.57	#NULL!	477	#NULL!	-	+	+	+	-	+	+
1384049	薛梦妍	4	2	2	2	2	#NULL!	23.5	1	7	30	155	#NULL!	#NULL!	9.98	0.53	#NULL!	#NULL!	65.6	41.4	92	2.79	42	0.79	#NULL!	#NULL!	228	#NULL!	-	+	+	+	-	+	+
1382331	田佳意	10	1	3	3	2	#NULL!	31	1	9	15	296	#NULL!	#NULL!	12.4	0.07	#NULL!	#NULL!	#NULL!	34.7	#NULL!	4.75	53	1.3	3.32	#NULL!	353	0.225	2+	+	+	+	-	+	+
1376721	尤鹏	13	1	4	4	2	#NULL!	42	1	10	2	146	#NULL!	#NULL!	12.6	0.12	1.57	#NULL!	65.4	34.8	186	8.86	116	#NULL!	2.38	#NULL!	485	0.873	3+	+	+	+	-	+	+
1375033	胡彪	13	1	4	4	2	#NULL!	46	1	7	5	234	#NULL!	#NULL!	12.5	0.08	#NULL!	#NULL!	59.9	33.3	156	3.15	52	#NULL!	2.56	#NULL!	162	0.303	-	+	+	+	-	+	+
1373630	何佳豪	13	1	4	4	1	#NULL!	50	1	7	2	192	#NULL!	#NULL!	16.8	0.15	1.35	#NULL!	#NULL!	#NULL!	#NULL!	7.24	73	#NULL!	#NULL!	#NULL!	316	#NULL!	1+	-	+	+	-	+	+
1372741	汪小兵	10	1	3	3	2	#NULL!	30	1	7	5	274	#NULL!	#NULL!	12.7	0.07	#NULL!	#NULL!	67.2	41.3	240	4.93	75	0.87	#NULL!	#NULL!	365	#NULL!	-	+	+	+	-	+	+
1372710	张娅	6	2	2	2	2	#NULL!	17	1	7	4	203	#NULL!	#NULL!	11.8	0.07	#NULL!	#NULL!	61.5	36.8	83	6.19	45	0.83	2.71	#NULL!	465	#NULL!	2+	+	+	+	+	+	+
1370925	张强	11	1	3	3	2	#NULL!	34	1	6	30	500	#NULL!	#NULL!	26	0.14	55.64	#NULL!	#NULL!	#NULL!	#NULL!	12.3	120	1.58	#NULL!	#NULL!	436	#NULL!	1+	-	-	+	-	-	+
1370629	何建	11	1	3	3	2	#NULL!	37	1	7	7	312	#NULL!	#NULL!	17.1	0.2	2.3	#NULL!	63.7	29.6	73	8.32	57	0.96	3.35	#NULL!	394	1.902	3+	-	+	+	-	+	+
1368371	卢小宝	10	1	3	3	2	#NULL!	28	1	8	10	315	#NULL!	#NULL!	14.2	0.22	#NULL!	#NULL!	#NULL!	#NULL!	282	9.16	68	0.94	#NULL!	#NULL!	1180	#NULL!	-	-	+	+	-	+	+
1368193	罗轩	9	1	3	3	1	#NULL!	27	1	7	30	186	#NULL!	#NULL!	12.8	0.621	86.79	#NULL!	#NULL!	#NULL!	#NULL!	4.22	49	0.8	#NULL!	#NULL!	25	#NULL!	-	+	+	+	-	+	+
1365165	李晨雨	12	1	3	4	2	#NULL!	33	1	11	4	433	#NULL!	#NULL!	21.4	0.06	13.84	#NULL!	67.8	28	92	8.75	55	0.71	3.4	#NULL!	583	0.404	2+	-	-	+	-	+	+
1358369	田宇迪	6	1	2	2	2	#NULL!	15	1	25	6	21	3.19	#NULL!	9.94	0.19	167.44	#NULL!	51.6	25.8	47	24.16	110	2.02	2.73	#NULL!	66.1	#NULL!	2+	+	+	+	-	+	+
1356283	张小春	13	1	4	4	2	#NULL!	60	1	34	30	299	6.33	#NULL!	18.4	1.23	0.55	#NULL!	79	33.7	356	10.66	355	2.2	5.32	#NULL!	1000	2.491	3+	-	+	+	-	+	+
1354731	黄亚行	12	2	3	4	2	#NULL!	38	1	10	20	334	#NULL!	#NULL!	10.3	0.49	#NULL!	#NULL!	54	30.6	264	3.58	39	0.59	4.67	#NULL!	455	#NULL!	2+	+	+	+	-	+	+
1348363	余志豪	9	1	3	3	2	#NULL!	25	1	7	2	159	#NULL!	#NULL!	9.74	0.11	0.186	#NULL!	56.1	32.4	98	13.2	84	1.4	3.54	#NULL!	288	0.325	-	+	+	+	-	+	+
1348171	冉清锋	13	1	4	4	2	#NULL!	38.5	1	7	10	305	#NULL!	#NULL!	11.6	0.3	0.018	#NULL!	58.7	34.7	202	8.32	58	1.27	3.28	#NULL!	104	0.082	-	+	+	+	-	+	+
1336795	杨文轩	3	1	1	1	1	#NULL!	11	1	7	20	292	#NULL!	#NULL!	6.73	0.45	122.538	#NULL!	70.6	43.8	175	4.51	31	1.02	4.01	#NULL!	207	0.052	-	+	+	+	-	+	+
1327347	苏梓钥	7		2	2	2	#NULL!	20	1	7	4	268	#NULL!	#NULL!	13.2	0.74	#NULL!	#NULL!	67.5	42.4	84	2.65	37	0.61	#NULL!	#NULL!	151	#NULL!	-	+	+	+	-	+	+
1318140	王杰谣	12	1	3	4	2	#NULL!	30	1	5	15	263	#NULL!	#NULL!	13.9	0.09	0.702	#NULL!	33.8	33.8	143	7.53	89	1.08	3.65	#NULL!	533	#NULL!	-	+	+	+	-	+	+
1315297	王宇晨	13	1	4	4	1	#NULL!	50	1	10	4	197	#NULL!	#NULL!	15.2	0.08	3.571	#NULL!	71.4	31.5	258	7.3	79	1.26	1.89	#NULL!	48.5	#NULL!	3+	-	+	+	-	+	+
1307082	田康康	9	1	3	3	2	#NULL!	40	1	9	3	226	#NULL!	#NULL!	20.7	0.11	99.484	#NULL!	68.9	37.2	219	7.24	52	1.3	#NULL!	#NULL!	714	#NULL!	2+	-	-	+	-	+	+
1306534	卢梦羽	11	1	3	3	2	#NULL!	33	1	7	7	253	#NULL!	#NULL!	14.9	0.38	131.917	#NULL!	#NULL!	#NULL!	#NULL!	8.21	68	0.94	#NULL!	#NULL!	204	#NULL!	-	-	+	+	-	+	+
1303805	马丹丹	10	2	3	3	2	#NULL!	33	1	7	10	313	#NULL!	#NULL!	19	0.08	#NULL!	#NULL!	66	32.8	158	11.83	81	1.55	4.02	#NULL!	639	#NULL!	-	-	+	+	-	+	+
1298972	吴佳豪	12	1	3	4	2	#NULL!	32	1	6	6	217	#NULL!	#NULL!	12	0.09	0.375	#NULL!	61.7	34.2	210	2.61	52	0.97	3.93	#NULL!	979.9	#NULL!	2+	+	+	+	-	+	+
1295694	田原	8	1	3	3	2	#NULL!	13	1	7	10	219	#NULL!	#NULL!	12.2	0.07	#NULL!	#NULL!	57.3	32	85	8.49	59	1.14	3.1	#NULL!	608	#NULL!	2+	+	+	+	-	+	+
1292701	王子	10	1	3	3	2	#NULL!	31	1	7	5	222	#NULL!	#NULL!	10.6	0.07	0.504	#NULL!	65.8	29.9	234	14.86	84	1.41	3.33	#NULL!	157	#NULL!	3+	+	+	+	-	+	+
1289914	罗林	7	1	2	2	2	#NULL!	28	1	6	5	392	#NULL!	#NULL!	13.7	0.09	2.221	#NULL!	58.6	32.2	128	6.07	94	1.26	#NULL!	#NULL!	351	#NULL!	2+	+	+	+	-	+	+
1288639	杨自力	9	1	3	3	2	#NULL!	25.5	1	9	4	249	#NULL!	#NULL!	16.3	0.22	3.458	#NULL!	70.1	37.4	183	3.88	67	0.89	3.78	#NULL!	979	0.936	1+	-	+	+	-	+	+
1283173	王仕成	14	1	4	4	2	#NULL!	50	1	13	7	237	#NULL!	#NULL!	18.7	0.23	0.001	#NULL!	56.9	16	360	7.81	119	1.98	5.77	#NULL!	149	3.555	3+	+	+	-	+	+	+
1282889	李睿	10	1	3	3	2	#NULL!	35	1	14	1	243	2.52	#NULL!	9.03	0.82	3.689	#NULL!	60.9	37	123	4.61	49	0.52	#NULL!	#NULL!	87.5	7.713	3+	+	+	+	+	+	+
1282737	罗吉林	10	1	3	3	1	#NULL!	37	1	8	10	237	#NULL!	#NULL!	12	0.23	21.255	#NULL!	58.2	24.5	255	9.95	70	1.21	5.41	#NULL!	880	6.475	±	+	+	+	+	+	+
1281880	郑乾航	13	1	4	4	2	#NULL!	37.5	1	5	4	189	#NULL!	#NULL!	9.68	0.06	1.084	#NULL!	#NULL!	37.4	#NULL!	7.7	69	1	2.68	#NULL!	126	#NULL!	-	+	+	+	-	+	+
1280675	王世欧	11	1	3	3	1	#NULL!	29	1	7	26	350	#NULL!	#NULL!	11.7	0.99	#NULL!	#NULL!	#NULL!	41.1	#NULL!	4.42	42	0.85	4.52	#NULL!	137	0.518	2+	+	+	+	-	+	+
1280461	梁滔	11	1	3	3	2	#NULL!	33	1	7	10	364	#NULL!	#NULL!	8.27	0.39	#NULL!	#NULL!	51.7	28.1	127	5.23	56	0.92	4.32	#NULL!	209	3.081	1+	+	+	+	-	+	+
1279160	黄吉	12	1	3	4	2	#NULL!	48	1	7	18	251	#NULL!	#NULL!	13.6	0.13	0.218	#NULL!	#NULL!	#NULL!	#NULL!	#NULL!	#NULL!	#NULL!	#NULL!	#NULL!	171	#NULL!	2+	+	+	+	-	+	+
1278279	天顺双	12	2	3	4	2	#NULL!	50	1	13	11	316	#NULL!	#NULL!	12.1	0.17	1.034	#NULL!	45.8	19.7	128	7.56	110	1.49	6.59	#NULL!	328	5.725	3+	+	+	+	-	+	+
1274322	龚德均	12	1	3	4	1	#NULL!	38	1	17	10	388	#NULL!	#NULL!	11.2	0.28	#NULL!	#NULL!	#NULL!	29.9	#NULL!	5.56	58	#NULL!	5.4	#NULL!	171	0.318	2+	+	+	+	-	+	+
1273212	蒲建成	7	1	2	2	2	#NULL!	27	1	14	13	#NULL!	#NULL!	#NULL!	18.4	0.76	#NULL!	#NULL!	#NULL!	49.5	#NULL!	5.82	61	1.27	5.22	#NULL!	462	#NULL!	-	-	+	+	-	+	+
1266181	秦琴	12	2	3	4	2	#NULL!	35.5	1	26	12	189	4.55	#NULL!	10.1	0.59	13.284	#NULL!	63.5	35.1	102	21.72	515	5.93	3.75	#NULL!	749	#NULL!	3+	+	+	+	-	+	+
1264798	邹远涛	11	1	3	3	2	#NULL!	46	1	16	6	243	#NULL!	#NULL!	10.9	0.08	0.01	#NULL!	57.4	33.7	129	8.34	76	1.32	3.15	#NULL!	175	0.158	3+	+	+	+	-	+	+
1259353	张锋	12	1	3	4	2	#NULL!	36	1	9	24	237	#NULL!	#NULL!	14.6	0.64	8.874	#NULL!	#NULL!	38.2	#NULL!	#NULL!	#NULL!	#NULL!	3.76	#NULL!	785	#NULL!	-	-	+	+	-	+	+
1259320	李文杰	8	1	3	3	2	#NULL!	25	1	18	5	326	#NULL!	#NULL!	16.2	0.07	19.84	#NULL!	68.5	23.2	209	18.62	222	1.55	4.47	#NULL!	3720	5.339	2+	-	+	+	-	+	+
1259013	冉浩天	12	1	3	4	2	#NULL!	51	1	11	12	272	#NULL!	#NULL!	10.5	0.07	#NULL!	#NULL!	55.3	30.7	159	4.73	42	1.1	3.58	#NULL!	74.1	#NULL!	3+	+	+	+	-	+	+
1255779	夏银豪	12	1	3	4	2	#NULL!	45	1	9	5	178	3.27	#NULL!	13.8	0.06	6.002	#NULL!	65.7	35.2	124	12.57	73	1.56	2.67	#NULL!	300	#NULL!	3+	+	+	+	-	+	+
1250261	罗玉竹	11	2	3	3	2	#NULL!	38	1	6	14	208	#NULL!	#NULL!	13.6	0.86	21.739	#NULL!	68.3	46.6	202	2.78	42	1.15	3.34	#NULL!	25	#NULL!	-	+	+	+	-	+	+
1249910	何浚浚	6	1	2	2	2	#NULL!	36	1	5	10	205	1.8	16.116	5.68	0.71	172.43	11.957	55.1	33	218	3.44	38	0.72	6.52	#NULL!	396.5	1.49	2+	+	+	+	-	+	+
1248989	郑远东	8	1	3	3	2	#NULL!	29	1	15	1	236	#NULL!	#NULL!	8.42	0.06	15.397	#NULL!	54.1	30.1	116	14.39	93	1.91	2.96	#NULL!	138	#NULL!	-	+	+	+	-	+	+
1247858	郭骏锋	13	1	4	4	2	#NULL!	55	1	9	60	275	#NULL!	#NULL!	16.4	0.46	0.699	#NULL!	68.2	37.6	132	3.88	51	1.19	2.7	#NULL!	459	#NULL!	-	-	+	+	-	+	+
1246540	刘洪海	8	1	3	3	2	#NULL!	26	1	9	6	107	#NULL!	#NULL!	9.35	0.08	0.336	#NULL!	58.3	34.2	119	12.28	60	1.39	3.25	#NULL!	237	1.138	2+	+	+	+	-	+	+
1239537	田庆	10	2	3	3	2	#NULL!	28	1	5	5	289	#NULL!	#NULL!	14.3	0.43	0.84	#NULL!	66.5	39.6	179	4.2	57	1.04	4.22	#NULL!	1660	#NULL!	-	+	-	+	-	-	+
1238135	魏臣均	10	1	3	3	2	#NULL!	31.5	1	12	5	204	#NULL!	#NULL!	10.8	0.17	91.046	#NULL!	56.3	32.8	134	14.65	61	#NULL!	3.31	#NULL!	144	#NULL!	3+	+	+	+	-	+	+
1234633	胡明民	11	1	3	3	1	#NULL!	32	1	4	1	274	#NULL!	#NULL!	10.3	0.06	0.087	#NULL!	59.8	38.2	142	3.74	56	0.7	3.69	#NULL!	1620	0.337	-	+	+	+	-	+	+
1228231	胡文浩	8	1	3	3	2	#NULL!	28	1	7	3	295	#NULL!	#NULL!	8.47	0.09	0.01	#NULL!	58.1	33.9	124	9.64	62	1.07	3.04	#NULL!	430	#NULL!	2+	+	+	+	-	+	+
1227787	杨克	14	1	4	4	2	#NULL!	53	1	11	35	212	#NULL!	#NULL!	16.1	0.06	40.331	#NULL!	58.9	29	207	5.48	63	1.11	2.9	#NULL!	55.3	2.903	3+	-	+	+	-	+	+
1227418	易磊	13	1	4	4	2	#NULL!	42	1	7	120	240	#NULL!	#NULL!	10.7	1.05	4.208	#NULL!	#NULL!	#NULL!	#NULL!	4.43	58	1.58	#NULL!	#NULL!	569	#NULL!	-	+	+	+	-	+	+
1226592	梁佳佳	10	2	3	3	2	#NULL!	35	1	7	30	380	#NULL!	#NULL!	7.83	0.75	#NULL!	#NULL!	66.5	39.1	344	3.29	38	0.92	4.65	#NULL!	25	2.449	2+	+	+	+	-	+	+
1220711	骆忠明	12	1	3	4	2	#NULL!	37	1	8	35	305	#NULL!	#NULL!	14.7	0.38	0.046	#NULL!	77.5	42.2	325	5.83	60	1.14	2.9	#NULL!	163	1.019	-	-	+	+	-	+	+
1218264	秦元元	13	1	4	4	2	#NULL!	48	1	7	4	124	#NULL!	#NULL!	12.3	0.21	0.01	#NULL!	#NULL!	#NULL!	#NULL!	5.03	83	1.24	#NULL!	#NULL!	780	#NULL!	2+	+	+	+	-	+	+
1215523	杨佳恩	7	1	2	2	2	#NULL!	20	1	7	5	289	2.2	#NULL!	10.8	0.12	17.65	#NULL!	63.5	33.9	132	4.56	40	0.99	4.26	#NULL!	512	#NULL!	±	+	-	+	-	-	+
1211039	杨松松	10	1	3	3	1	#NULL!	26	1	8	1	259	#NULL!	#NULL!	14.2	0.71	0.133	#NULL!	#NULL!	#NULL!	#NULL!	9.28	52	0.77	#NULL!	#NULL!	134	#NULL!	-	-	+	+	-	+	+
1209376	徐顺	10	1	3	3	2	#NULL!	32	1	11	7	218	#NULL!	#NULL!	11.8	0.57	#NULL!	#NULL!	53.4	28	112	22.04	99.5	2.65	4.92	#NULL!	761	#NULL!	3+	+	+	+	-	+	+
1205235	田绍平	12	1	3	4	2	#NULL!	75	1	18	5	280	3.74	#NULL!	15	0.07	4.73	#NULL!	64.3	31	183	4.85	64	1.12	4.48	#NULL!	506	4.227	3+	-	+	+	-	+	+
1200976	刘舒云	8	2	3	3	2	#NULL!	24	1	6	4	279	#NULL!	#NULL!	11.8	0.28	#NULL!	#NULL!	68.2	40.8	263	3.81	50	0.95	4.23	#NULL!	595	#NULL!	-	+	+	+	-	+	+
1194612	权丽丽	4	2	2	2	2	#NULL!	17	1	6	1	297	#NULL!	#NULL!	17.5	0.43	17.71	#NULL!	#NULL!	#NULL!	#NULL!	2.31	30	#NULL!	#NULL!	#NULL!	973	#NULL!	-	-	+	+	-	+	+
1193854	石茂琦	7	1	2	2	2	#NULL!	23	1	7	30	332	2.22	#NULL!	11	0.19	0.15	#NULL!	#NULL!	#NULL!	#NULL!	#NULL!	#NULL!	#NULL!	#NULL!	#NULL!	367	2.08	2+	+	+	+	-	+	+
1185306	韩磊	11	1	3	3	2	#NULL!	33	1	7	10	333	#NULL!	#NULL!	10.8	0.4	7	#NULL!	74.7	44.2	284	5.22	46	0.72	#NULL!	#NULL!	148	0.076	-	+	+	+	-	+	+
1184718	黎芳	12	2	3	4	2	#NULL!	39	1	7	10	311	1.73	#NULL!	11.5	0.29	69.41	#NULL!	69.3	44	201	6.45	55	1.29	4.72	#NULL!	199	#NULL!	-	+	+	+	-	+	+
1184066	王喜欢	11	1	3	3	2	#NULL!	44	1	14	4	141	3.66	#NULL!	18.2	0.1	0.35	#NULL!	82.9	43.4	328	13.06	152	1.92	#NULL!	#NULL!	739	0.245	-	-	+	+	-	+	+
1181360	黄高飞	14	1	4	4	2	#NULL!	43.5	1	9	7	187	2.39	#NULL!	12.5	0.13	553.36	#NULL!	58.8	31.5	219	4.24	104	1.32	3.21	#NULL!	73.3	1.234	1+	+	+	+	-	+	+
1180875	舒红青	14	2	4	4	2	#NULL!	37	1	13	7	399	4.17	#NULL!	14.8	0.06	18.66	#NULL!	71.6	35.4	246	10.33	112	1.22	#NULL!	#NULL!	1140	1.585	-	-	+	+	-	+	+
1180748	何道容	10	2	3	3	2	#NULL!	30	1	8	7	264	3.38	#NULL!	14.1	0.08	9.56	#NULL!	62.1	30	153	10.09	66	1.53	5.31	#NULL!	787	2.377	2+	+	+	+	-	+	+
1180739	辜高琴	13	2	4	4	2	#NULL!	53	1	4	11	386	2.77	#NULL!	15.1	0.34	0.88	#NULL!	#NULL!	39.3	#NULL!	3.38	45	0.84	3.51	#NULL!	757	#NULL!	±	-	+	+	+	+	+
1180131	彭祖洪	11	1	3	3	2	#NULL!	52	1	7	5	157	3.15	#NULL!	11.6	0.06	3.49	#NULL!	62.9	35.9	208	10.54	72	1.28	#NULL!	#NULL!	436	1.858	-	+	+	+	-	+	+
1179212	孟俊杰	9	1	3	3	2	#NULL!	35	1	8	4	123	2.5	#NULL!	16.5	0.06	7.52	#NULL!	59.6	31.6	151	13.23	80	1.4	3.09	#NULL!	220	0.177	2+	-	+	+	-	+	+
1178003	严铭卓	7	1	2	2	2	#NULL!	26.5	1	9	6	270	#NULL!	#NULL!	12.1	0.2	23.73	#NULL!	61.3	33.5	128	8.46	39	1.11	3.48	#NULL!	619	#NULL!	2+	+	+	+	-	+	+
1176010	穆永亮	12	1	3	4	2	#NULL!	33	1	5	4	336	#NULL!	#NULL!	8.59	0.06	11.27	#NULL!	#NULL!	#NULL!	#NULL!	9.09	58	1.18	3.62	#NULL!	242	#NULL!	±	+	+	+	-	+	+
1171890	刘灿	8	2	3	3	2	#NULL!	27	1	7	12	214	#NULL!	#NULL!	13.7	0.09	33.77	#NULL!	#NULL!	#NULL!	#NULL!	6.39	109	2.03	#NULL!	#NULL!	785	1.22	2+	+	+	+	-	+	+
1169350	龙鑫	7	1	2	2	2	#NULL!	22	1	12	3	184	#NULL!	#NULL!	8.58	1.36	#NULL!	#NULL!	60.5	34.7	129	3.52	48	1.27	4.09	#NULL!	25	0.993	1+	+	+	+	-	+	+
1166316	李耀辉	11	1	3	3	1	#NULL!	33	1	7	4	293	#NULL!	#NULL!	10.5	0.29	25.67	#NULL!	57.9	35.1	167	4.68	60	1.17	#NULL!	#NULL!	543	#NULL!	±	+	+	+	-	+	+
1161496	龙鑫	7	1	2	2	2	#NULL!	22	1	7	3	173	#NULL!	#NULL!	6.23	0.92	#NULL!	#NULL!	48.1	3.58	200	30.4	50	1.04	#NULL!	#NULL!	25	#NULL!	2+	+	+	+	-	+	+
1159244	袁敏敏	12	2	3	4	2	#NULL!	35	1	13	10	193	#NULL!	#NULL!	9.09	0.21	0.06	#NULL!	64.2	38	217	4.48	63	1.29	3.17	#NULL!	256	#NULL!	-	+	+	+	-	+	+
1154989	杨胜元	14	1	4	4	2	#NULL!	40	1	11	14	327	#NULL!	#NULL!	21	0.37	0.01	#NULL!	72.8	30.3	198	3.26	60	0.85	5.6	#NULL!	1950	#NULL!	-	-	-	+	-	+	+
1153735	周豪	12	1	3	4	2	#NULL!	29	1	9	11	320	#NULL!	#NULL!	14.1	0.44	1.4	#NULL!	67.3	39.3	178	5.25	53	1.02	3.83	#NULL!	284	#NULL!	-	+	+	+	-	+	+
1150046	杨军	5	1	2	2	2	#NULL!	19	1	7	7	337	#NULL!	#NULL!	7.69	0.6	7.38	#NULL!	60.8	35.3	237	2.43	32	0.74	4.36	#NULL!	25	#NULL!	-	+	+	+	-	+	+
1144955	王兴伟	11	1	3	3	1	#NULL!	28	1	9	10	262	#NULL!	#NULL!	17.1	0.08	0.01	#NULL!	71.8	44.8	185	4.99	71	1.31	3.64	#NULL!	1130	#NULL!	-	-	+	+	-	+	+
1141931	廖明成	12	1	3	4	2	#NULL!	31	1	18	13	261	#NULL!	#NULL!	15.2	0.07	801.56	#NULL!	68.8	31.2	143	4.81	59	0.88	#NULL!	#NULL!	198	#NULL!	-	-	+	+	-	+	+
1140690	赵红江	13	1	4	4	2	#NULL!	44	1	11	12	269	#NULL!	#NULL!	16.1	0.26	#NULL!	#NULL!	#NULL!	31.4	#NULL!	27.92	206	2.97	4.69	#NULL!	616	#NULL!	3+	-	-	+	-	+	+
1136072	张润松	11	1	3	3	2	#NULL!	28	1	7	7	261	#NULL!	#NULL!	14.1	0.48	#NULL!	#NULL!	67.2	40.5	190	2.75	48	1.17	4.27	#NULL!	862	0.145	-	+	+	+	-	+	+
1135955	申钟炜	7	1	2	2	2	#NULL!	22	1	8	10	378	#NULL!	#NULL!	12.2	0.31	2.64	#NULL!	68.4	41.9	174	5.6	41	0.94	3.5	#NULL!	243	#NULL!	±	+	+	+	-	+	+
1122219	龙庭	11	1	3	3	2	#NULL!	40	1	8	32	213	3.85	#NULL!	9.58	0.08	#NULL!	#NULL!	63.2	36.5	91	8.34	84	1.6	#NULL!	#NULL!	159	#NULL!	2+	+	+	+	-	+	+
1117099	吴丹丹	11	2	3	3	2	#NULL!	28	1	2	14	304	#NULL!	#NULL!	14.8	0.07	#NULL!	#NULL!	#NULL!	#NULL!	#NULL!	#NULL!	#NULL!	#NULL!	5.06	#NULL!	1218.3	#NULL!	2+	-	+	+	-	+	+
